# Supplementary material for: M. orygis hypervirulence provides new insights into tuberculosis pathogenesis
Source: Research Square preprint supplement (doi:10.21203/rs.3.rs-3911791/v1), 2024-02-07
Supplement: Supplementary file 1 [file 044aa82b1773b3494adb1fb9.xlsx]

## Sheet: Sheet1
Protein	N_Bovis_Filtrate_1	N_Bovis_Filtrate_2	N_Bovis_Filtrate_3	N_MTB_super_1	N_MTB_super_2	N_Orygis_filtrate_1	N_Orygis_filtrate_2	N_Orygis_filtrate_3
CFP10	29.3205	29.623	31.7359	24.1954	22.4883	24.7651	25.0831	28.2493
ESAT-6	39.6405	39.4523	37.6379	32.2457	34.2319	14.821	16.5903	18.8386
MPT70	6.2244	5.9003	5.63995	0.133059	0.0806017	18.2487	17.0036	14.9207
HSP65	5.78448	5.30947	5.87603	14.9611	14.8664	15.612	16.2521	14.383
MPT83	2.02678	1.8361	1.89899	-0.103716	-0.148382	13.9923	12.8324	11.3869
PPE_Family	1.42188	1.29898	1.24523	1.84968	2.43587	11.1673	10.991	9.15908
HSP70	2.705	2.7313	2.78883	8.00584	4.92198	9.24624	9.26242	8.16039
MetE	2.97995	2.89244	3.35179	7.05874	5.73978	9.13324	8.84905	7.77629
EF-TU	3.16325	3.01776	3.24283	4.543	3.15553	8.22923	7.98474	7.08489
ESP-A	5.50952	5.34528	5.44019	2.73759	1.51993	6.91088	6.14338	6.39349
MPT64	3.69483	4.25314	4.09635	7.65068	4.88926	7.51356	8.21021	6.0862
GroeS	2.24674	2.14047	2.66171	4.6022	5.67435	5.06519	5.39181	5.24116
ESX-N	2.1001	2.22999	2.22587	12.3566	13.5579	3.85985	5.39181	4.16566
GroeL	1.18358	1.11994	1.11811	2.29363	2.04332	3.93518	3.88866	3.2438
FadB	0.578686	0.708152	0.627791	1.28734	1.45451	3.63384	2.16004	3.09015
ESX-K	1.38522	1.58545	1.53579	6.70358	5.73978	3.14417	3.77592	3.01333
KatG	0.780319	0.797672	0.845711	2.14565	3.28638	2.4285	2.16004	3.01333
RpoC	0.15709	0.206841	0.391711	1.43532	1.06196	0.921811	0.769627	3.01333
Rv2940c	-0.062873	-0.0975261	-0.025969	0.843385	0.70213	-0.208203	0.0180529	2.47558
Mbt32A	1.25691	1.46012	1.48131	0.636207	0.571282	3.03117	2.91161	2.32193
FixB	1.14692	1.04833	0.918351	2.73759	2.20688	2.4285	2.38551	2.24511
RpoA	0.816979	0.958808	0.918351	1.58331	1.42179	2.84283	3.13709	2.24511
Rv1475c	0.358723	0.529112	0.718591	2.5896	2.17417	1.93882	1.82183	2.24511
Rv0248c	0.743658	0.74396	0.518831	0.488222	0.767553	2.31549	2.27278	2.24511
Double hotdog Hydratase	0.652007	0.618632	0.591471	-0.16291	0.0478897	2.72983	2.91161	2.16829
Rv2525c	1.03694	1.20946	1.08179	0.281044	0.276874	2.5415	2.68614	2.09147
RpsA-S1 subunit	0.780319	0.618632	0.555151	1.43532	1.45451	2.5415	2.38551	2.09147
Ag85C	1.18358	0.869288	0.754911	0.784192	0.767553	2.24016	2.61098	2.01465
Aminopeptidase N	0.468704	0.278457	0.391711	0.488222	1.06196	1.93882	1.82183	2.01465
MoxR	0.578686	0.332169	0.464351	0.192253	0.0806017	1.71282	2.0473	1.93782
Ag85A	1.60518	1.76449	1.73555	3.74388	1.87976	2.5415	2.68614	1.861
CFP-2	1.25691	1.24527	1.11811	7.05874	6.623	2.01416	1.40847	1.861
Rv3717	0.85364	0.923	0.882031	1.79049	1.06196	2.24016	2.27278	1.861
Citrate Synthase	0.816979	0.797672	0.845711	2.5896	2.40315	2.24016	2.0473	1.861
Rv3676	0.542025	0.74396	0.791231	0.488222	0.342298	2.12716	2.38551	1.861
