# Supplementary material for: M. orygis hypervirulence provides new insights into tuberculosis pathogenesis
Source: Research Square preprint supplement (doi:10.21203/rs.3.rs-3911791/v1), 2024-02-07
Supplement: Supplementary file 2 [file fda001d62ebf3c82844bbeae.xlsx]

## Sheet: Sheet1
Bio View:2998 Proteins in 2675 Clusters	Accession Number	Molecular Weight	Bovis_1	Bovis_Filtrate_2	Bovis_Filtrate_3	MTB_super_1	MTB_super_2	Orygis_filtrate_1	Orygis_filtrate_2	Orygis_filtrate_3
ESAT-6-like protein EsxB [Mycobacterium tuberculosis H37Rv]	NP_218391.1 (+3)	11 kDa	1605	1660	1753	823	693	663	673	741
major secreted immunogenic protein Mpt70 [Mycobacterium tuberculosis H37Rv]	NP_217391.1 (+3)	19 kDa	345	335	316	10	8	490	458	394
60 KDA CHAPERONIN 2 GROEL2 (PROTEIN CPN60-2) (GROEL PROTEIN 2) (65 KDA ANTIGEN) (HEAT SHOCK PROTEIN 65) (CELL WALL PROTEIN A) (ANTIGEN A) [Mycobacterium tuberculosis variant bovis AF2122/97]	CAB5248154.1 (+3)	57 kDa	321	302	329	511	460	420	438	380
type VII secretion system ESX-1 WXG100 family target ESAT-6 [Mycobacterium orygis]	QOY48810.1 (+3)	10 kDa	2168	2209	2078	1095	1052	399	447	496
cell surface lipoprotein [Mycobacterium tuberculosis H37Rv]	NP_217389.1 (+3)	22 kDa	116	108	110	2	1	377	347	302
Cluster of PPE family protein [Mycobacterium orygis] (QOY49925.1)	QOY49925.1 [9]	39 kDa	83	78	74	68	80	302	298	244
PROBABLE CHAPERONE PROTEIN DNAK (HEAT SHOCK PROTEIN 70) (HEAT SHOCK 70 KDA PROTEIN) (HSP70) [Mycobacterium tuberculosis variant bovis AF2122/97]	CAB5248063.1 (+3)	67 kDa	153	158	159	276	156	251	252	218
5-methyltetrahydropteroyltriglutamate--homocysteine methyltransferase [Mycobacterium tuberculosis H37Rv]	NP_215649.1 (+3)	82 kDa	168	167	190	244	181	248	241	208
elongation factor Tu [Mycobacterium tuberculosis H37Rv]	NP_215199.1 (+3)	44 kDa	178	174	184	159	102	224	218	190
immunogenic protein Mpt64 [Mycobacterium tuberculosis H37Rv]	NP_216496.1 (+3)	25 kDa	207	243	231	264	155	205	224	164
ESX-1 secretion-associated protein EspA [Mycobacterium tuberculosis H37Rv]	NP_218133.1 (+3)	40 kDa	306	304	305	98	52	189	169	172
chaperonin GroES [Mycobacterium tuberculosis H37Rv]	NP_217935.1 (+3)	11 kDa	128	125	152	161	179	140	149	142
chaperonin GroEL [Mycobacterium tuberculosis H37Rv]	NP_217934.1 (+3)	56 kDa	70	68	67	83	68	110	109	90
Cluster of effector [Mycobacterium orygis] (QOY47470.1)	QOY47470.1 [13]	10 kDa	120	130	128	423	420	108	149	114
Cluster of fatty oxidation protein FadB [Mycobacterium tuberculosis H37Rv] (NP_215375.1)	NP_215375.1 [4]	76 kDa	37	45	40	49	50	102	63	86
Cluster of ESAT-6 like protein EsxK [Mycobacterium tuberculosis H37Rv] (NP_215713.1)	NP_215713.1 [14]	11 kDa	81	94	90	232	181	89	106	84
probable serine protease pepa (serine proteinase) (mtb32a) [Mycobacterium tuberculosis variant bovis AF2122/97]	CAB5247832.1 (+3)	35 kDa	74	87	87	27	23	86	83	66
DNA-directed RNA polymerase subunit alpha [Mycobacterium tuberculosis H37Rv]	NP_217974.1 (+3)	38 kDa	50	59	56	59	49	81	89	64
double hotdog hydratase [Mycobacterium tuberculosis variant bovis AF2122/97]	CAB5247928.1 (+3)	36 kDa	41	40	38	0	7	78	83	62
Cluster of PROBABLE 3-OXOACYL-[ACYL-CARRIER PROTEIN] REDUCTASE FABG4 (3-KETOACYL-ACYL CARRIER PROTEIN REDUCTASE) [Mycobacterium tuberculosis variant bovis AF2122/97] (CAB5247954.1)	CAB5247954.1 [4]	47 kDa	41	50	45	81	68	75	80	50
diacylglycerol acyltransferase/mycolyltransferase Ag85A [Mycobacterium tuberculosis H37Rv]	NP_218321.1 (+3)	36 kDa	93	104	101	132	63	73	77	54
probable iron-regulated phosphoenolpyruvate carboxykinase [gtp] pcka (phosphoenolpyruvate carboxylase) (pepck)(pep carboxykinase) [Mycobacterium tuberculosis variant bovis AF2122/97]	CAB5247923.1 (+3)	67 kDa	66	71	69	49	42	73	72	52
hypothetical protein Rv2525c [Mycobacterium tuberculosis H37Rv]	NP_217041.1 (+3)	25 kDa	62	73	65	15	14	73	77	60
Cluster of 30S ribosomal protein S1 [Mycobacterium tuberculosis H37Rv] (NP_216146.1)	NP_216146.1 [4]	53 kDa	48	40	36	54	50	73	69	60
Cluster of PROBABLE ELECTRON TRANSFER FLAVOPROTEIN (ALPHA-SUBUNIT) FIXB (ALPHA-ETF) (ELECTRON TRANSFER FLAVOPROTEIN LARGE SUBUNIT) (ETFLS) [Mycobacterium tuberculosis variant bovis AF2122/97] (SIU01678.1)	SIU01678.1 [2]	32 kDa	68	64	56	98	73	70	69	64
Cluster of catalase-peroxidase [Mycobacterium tuberculosis H37Rv] (NP_216424.1)	NP_216424.1 [4]	81 kDa	48	50	52	78	106	70	63	84
catalase-peroxidase [Mycobacterium tuberculosis H37Rv]	NP_216424.1	81 kDa	48	50	52	78	106	70	63	84
catalase/peroxidase HPI [Mycobacterium orygis]	QOY50559.1	81 kDa	48	50	52	78	79	70	63	84
CATALASE-PEROXIDASE-PEROXYNITRITASE T KATG [Mycobacterium tuberculosis variant bovis AF2122/97]	SIU00546.1 (+1)	81 kDa	48	50	52	78	79	70	63	84
PROBABLE SUCCINATE DEHYDROGENASE [IRON-SULFUR SUBUNIT] (SUCCINIC DEHYDROGENASE) [Mycobacterium tuberculosis variant bovis AF2122/97]	CAB5247960.1 (+3)	71 kDa	46	47	34	22	29	67	66	64
SECRETED ANTIGEN 85-C FBPC (85C) (ANTIGEN 85 COMPLEX C) (AG58C) (MYCOLYL TRANSFERASE 85C) (FIBRONECTIN-BINDING PROTEIN C) [Mycobacterium tuberculosis variant bovis AF2122/97]	CAB5247836.1 (+3)	37 kDa	70	54	47	32	29	65	75	58
immunogenic protein Mpt63 [Mycobacterium tuberculosis H37Rv]	NP_216442.1 (+3)	17 kDa	62	75	74	107	54	65	66	46
hypothetical protein Rv3717 [Mycobacterium tuberculosis H37Rv]	NP_218234.1 (+3)	25 kDa	52	57	54	66	38	65	66	54
Cluster of citrate synthase [Mycobacterium orygis] (QOY49660.1)	QOY49660.1 [4]	48 kDa	50	50	52	93	79	65	60	54
integration host factor [Mycobacterium orygis]	QOY50110.1 (+1)	12 kDa	46	42	52	34	23	62	54	44
cAMP receptor protein [Mycobacterium tuberculosis H37Rv]	NP_218193.1 (+3)	25 kDa	35	47	49	22	16	62	69	54
Cluster of NADP-dependent isocitrate dehydrogenase [Mycobacterium orygis] (QOY48917.1)	QOY48917.1 [4]	83 kDa	31	31	34	34	30	62	52	52
ESX-1 secretion-associated protein EspC [Mycobacterium tuberculosis H37Rv]	NP_218132.1 (+3)	11 kDa	105	125	123	32	11	59	69	46
POSSIBLE CONSERVED EXPORTED PROTEIN [Mycobacterium tuberculosis variant bovis AF2122/97]	CAB5248023.1 (+3)	23 kDa	77	71	78	61	39	59	54	46
low molecular weight antigen MTB12 [Mycobacterium tuberculosis H37Rv]	NP_216892.1 (+3)	17 kDa	74	75	67	244	208	59	43	54
malate dehydrogenase [Mycobacterium tuberculosis H37Rv]	NP_215756.1 (+3)	34 kDa	54	66	54	61	35	59	69	48
Cluster of PROBABLE ELONGATION FACTOR TSF (EF-TS) [Mycobacterium tuberculosis variant bovis AF2122/97] (SIU01534.1)	SIU01534.1 [2]	29 kDa	50	54	54	42	49	59	66	42
iron-regulated peptidyl-prolyl cis-trans isomerase PpiA [Mycobacterium tuberculosis H37Rv]	NP_214523.1 (+3)	19 kDa	43	47	38	37	30	57	52	52
thiosulfate sulfurtransferase CysA [Mycobacterium tuberculosis H37Rv]	NP_215330.1 (+5)	31 kDa	37	38	31	27	38	57	46	44
aminopeptidase N [Mycobacterium orygis]	QOY47571.1 (+3)	94 kDa	31	21	27	22	38	57	54	58
PROBABLE ENDOPEPTIDASE ATP BINDING PROTEIN (CHAIN B) CLPB (CLPB PROTEIN) (HEAT SHOCK PROTEIN F84.1) [Mycobacterium tuberculosis variant bovis AF2122/97]	CAB5248096.1 (+3)	93 kDa	27	33	38	64	52	57	63	54
iron-regulated aconitate hydratase [Mycobacterium tuberculosis H37Rv]	NP_215991.1 (+3)	102 kDa	25	35	45	93	72	57	54	64
diacylglycerol acyltransferase/mycolyltransferase Ag85B [Mycobacterium tuberculosis H37Rv]	NP_216402.1 (+3)	35 kDa	52	50	54	100	61	54	60	46
peptidoglycan endopeptidase RipA [Mycobacterium tuberculosis H37Rv]	NP_215993.1 (+3)	50 kDa	43	42	34	37	33	54	49	46
ATP synthase subunit beta [Mycobacterium tuberculosis H37Rv]	NP_215826.1 (+3)	53 kDa	41	42	40	37	23	54	49	40
malate synthase [Mycobacterium tuberculosis H37Rv]	NP_216353.1 (+3)	80 kDa	35	35	34	51	44	54	52	44
hypothetical protein Rv0831c [Mycobacterium tuberculosis H37Rv]	NP_215346.1 (+3)	30 kDa	31	40	36	37	37	54	66	34
Cluster of S-adenosylmethionine synthetase [Mycobacterium tuberculosis H37Rv] (NP_215908.1)	NP_215908.1 [3]	43 kDa	25	28	27	39	20	54	40	44
3-oxoacyl-ACP synthase 2 [Mycobacterium tuberculosis H37Rv]	NP_216762.1 (+1)	46 kDa	23	14	16	17	22	54	49	42
Cluster of aldo/keto reductase [Mycobacterium orygis] (QOY48017.1)	QOY48017.1 [4]	30 kDa	37	40	38	27	24	51	40	34
MoxR family ATPase [Mycobacterium orygis]	QOY50193.1 (+3)	41 kDa	37	24	31	12	8	51	60	56
Cluster of superoxide dismutase [Mycobacterium tuberculosis H37Rv] (NP_218363.1)	NP_218363.1 [4]	23 kDa	33	21	25	24	30	51	54	36
esterase family protein [Mycobacterium orygis]	QOY48741.1 (+3)	31 kDa	62	64	78	86	30	48	52	50
meromycolate extension acyl carrier protein [Mycobacterium tuberculosis H37Rv]	NP_216760.1 (+3)	13 kDa	52	52	49	56	53	48	57	46
Cluster of transaldolase [Mycobacterium orygis] (QOY50164.1)	QOY50164.1 [4]	41 kDa	27	19	27	39	37	48	37	30
iron-regulated universal stress protein [Mycobacterium tuberculosis H37Rv]	NP_216152.1 (+3)	15 kDa	41	45	47	24	22	46	54	48
glutamine synthetase [Mycobacterium tuberculosis H37Rv]	NP_216736.1 (+3)	54 kDa	31	28	31	66	41	46	29	38
acyltransferase [Mycobacterium tuberculosis H37Rv]	NP_215374.1 (+3)	42 kDa	27	24	22	20	20	46	29	38
chaperone protein HtpG [Mycobacterium tuberculosis H37Rv]	NP_216815.1 (+3)	73 kDa	25	19	29	49	45	46	37	34
lipoprotein LpqH [Mycobacterium tuberculosis H37Rv]	NP_218280.1 (+3)	15 kDa	25	24	25	20	19	46	34	32
enoyl-CoA hydratase EchA21 [Mycobacterium tuberculosis H37Rv]	NP_218291.1 (+3)	29 kDa	17	19	22	24	20	46	46	26
iron-regulated heparin binding hemagglutinin hbha (adhesin) [Mycobacterium tuberculosis variant bovis AF2122/97]	CAB5248192.1 (+3)	22 kDa	31	28	31	54	20	43	49	48
beta-ketoacyl CoA thiolase FadA [Mycobacterium tuberculosis H37Rv]	NP_215590.1 (+3)	43 kDa	31	40	45	37	37	43	60	48
3-hydroxyacyl-thioester dehydratase HtdY [Mycobacterium tuberculosis H37Rv]	NP_217906.1 (+2)	30 kDa	27	33	31	27	30	43	52	38
thioredoxin TrxC [Mycobacterium tuberculosis H37Rv]	NP_218431.1 (+3)	13 kDa	27	28	22	22	15	43	43	34
fumarate hydratase [Mycobacterium tuberculosis H37Rv]	NP_215614.1 (+3)	50 kDa	25	21	22	42	38	43	43	38
two component DNA-binding response regulator MtrA [Mycobacterium tuberculosis H37Rv]	NP_217763.1 (+3)	25 kDa	25	33	31	17	19	43	43	38
Cluster of 50S ribosomal protein L1 [Mycobacterium tuberculosis H37Rv] (NP_215155.1)	NP_215155.1 [4]	25 kDa	14	26	25	24	18	43	37	30
Cluster of isocitrate lyase family protein [Mycobacterium orygis] (QOY50565.1)	QOY50565.1 [4]	85 kDa	14	21	29	0	0	43	37	46
hypothetical protein Rv3463 [Mycobacterium tuberculosis H37Rv]	NP_217980.1 (+3)	31 kDa	8	7	9	5	8	43	52	42
cell wall synthesis protein Wag31 [Mycobacterium tuberculosis H37Rv]	NP_216661.1 (+3)	28 kDa	33	28	27	39	27	40	43	44
single-strand DNA-binding protein [Mycobacterium tuberculosis H37Rv]	NP_214568.1 (+3)	17 kDa	33	33	27	22	23	40	46	38
Cluster of hypothetical protein Rv3722c [Mycobacterium tuberculosis H37Rv] (NP_218239.2)	NP_218239.2 [4]	47 kDa	25	35	27	17	23	40	34	22
dihydrolipoamide dehydrogenase lpdc (lipoamide reductase (nadh)) (lipoyl dehydrogenase) (dihydrolipoyl dehydrogenase) (diaphorase) [Mycobacterium tuberculosis variant bovis AF2122/97]	CAB5248178.1 (+3)	49 kDa	23	19	20	42	56	40	32	34
ISOCITRATE LYASE ICL (ISOCITRASE) (ISOCITRATASE) [Mycobacterium tuberculosis variant bovis AF2122/97]	CAB5248183.1 (+3)	47 kDa	21	17	18	24	19	40	37	32
Cluster of DNA polymerase III subunit beta [Mycobacterium tuberculosis H37Rv] (NP_214516.1)	NP_214516.1 [4]	42 kDa	19	24	22	17	23	40	43	34
cytoplasmic peptidase PepQ [Mycobacterium tuberculosis H37Rv]	NP_217051.1 (+3)	39 kDa	17	14	13	12	11	40	34	30
Cluster of secreted esx-1 substrate protein b, espb. conserved alanine and glycine rich protein [Mycobacterium tuberculosis variant bovis AF2122/97] (SIU02543.1)	SIU02543.1 [4]	48 kDa	39	50	47	29	14	38	26	42
3-oxoacyl-ACP synthase 1 [Mycobacterium tuberculosis H37Rv]	NP_216761.1 (+3)	43 kDa	29	17	22	37	41	38	32	28
hypothetical protein Rv1754c [Mycobacterium tuberculosis H37Rv]	NP_216270.1 (+3)	61 kDa	29	38	34	12	12	38	46	52
POSSIBLE LYSOPHOSPHOLIPASE [Mycobacterium tuberculosis variant bovis AF2122/97]	CAB5247894.1 (+3)	30 kDa	27	17	20	29	29	38	37	26
indole-3-glycerol phosphate synthase [Mycobacterium tuberculosis H37Rv]	NP_216127.1 (+3)	28 kDa	27	33	36	7	11	38	40	40
50S ribosomal protein L7/L12 [Mycobacterium tuberculosis H37Rv]	NP_215166.1 (+3)	13 kDa	25	33	31	34	19	38	37	30
Cluster of serine hydroxymethyltransferase [Mycobacterium orygis] (QOY50671.1)	QOY50671.1 [4]	45 kDa	25	24	20	12	24	38	40	30
PROBABLE SHORT-CHAIN TYPE DEHYDROGENASE/REDUCTASE [Mycobacterium tuberculosis variant bovis AF2122/97]	CAB5247858.1 (+3)	30 kDa	23	24	22	24	23	38	23	38
hypothetical protein Rv1566c [Mycobacterium tuberculosis H37Rv]	NP_216082.1 (+3)	24 kDa	21	17	20	15	19	38	29	32
PROBABLE FRUCTOSE-BISPHOSPHATE ALDOLASE FBA [Mycobacterium tuberculosis variant bovis AF2122/97]	CAB5248075.1 (+3)	37 kDa	17	14	11	29	37	38	54	24
L,D-transpeptidase [Mycobacterium tuberculosis variant bovis AF2122/97]	CAB5247904.1 (+3)	37 kDa	46	31	40	0	0	35	23	32
CYCLOPROPANE-FATTY-ACYL-PHOSPHOLIPID SYNTHASE 2 CMAA2 (CYCLOPROPANE FATTY ACID SYNTHASE) (CFA SYNTHASE) (CYCLOPROPANE MYCOLIC ACID SYNTHASE 2) (MYCOLIC ACID TRANS-CYCLOPROPANE SYNTHETASE) [Mycobacterium tuberculosis variant bovis AF2122/97]	CAB5248223.1 (+3)	35 kDa	25	21	22	17	22	35	37	30
Cluster of ADP-forming succinate--CoA ligase subunit beta [Mycobacterium orygis] (QOY49716.1)	QOY49716.1 [4]	41 kDa	19	21	27	34	18	35	34	24
methanol dehydrogenase transcriptional regulator MoxR [Mycobacterium tuberculosis H37Rv]	NP_218209.1 (+3)	38 kDa	12	14	7	0	4	35	32	26
Cluster of glycogen phosphorylase [Mycobacterium tuberculosis H37Rv] (NP_215844.1)	NP_215844.1 [2]	96 kDa	6	5	4	44	37	35	34	34
PROBABLE ACYL-COA DEHYDROGENASE FADE4 [Mycobacterium tuberculosis variant bovis AF2122/97]	CAB5247942.1 (+3)	63 kDa	6	7	9	20	23	35	20	26
chitinase [Mycobacterium tuberculosis H37Rv]	NP_216503.1 (+3)	15 kDa	43	50	43	22	16	32	40	30
cutinase [Mycobacterium tuberculosis H37Rv]	NP_216500.1 (+3)	22 kDa	35	38	43	44	30	32	37	28
Cluster of trigger factor [Mycobacterium tuberculosis H37Rv] (NP_216978.1)	NP_216978.1 [4]	51 kDa	31	28	36	66	53	32	34	32
Cluster of PROBABLE D-3-PHOSPHOGLYCERATE DEHYDROGENASE SERA1 (PGDH) [Mycobacterium tuberculosis variant bovis AF2122/97] (SIU01644.1)	SIU01644.1 [4]	55 kDa	25	19	38	37	58	32	37	40
elongation factor G [Mycobacterium orygis]	QOY49475.1 (+3)	77 kDa	25	21	11	32	35	32	40	54
hypothetical protein Rv0036c [Mycobacterium tuberculosis H37Rv]	NP_214550.1 (+3)	28 kDa	23	28	29	15	11	32	37	22
cell division protein FtsZ [Mycobacterium tuberculosis H37Rv]	NP_216666.1 (+3)	39 kDa	8	9	11	2	7	32	29	16
bifunctional guanosine pentaphosphate synthetase/polyribonucleotide nucleotidyltransferase [Mycobacterium tuberculosis H37Rv]	NP_217299.1 (+3)	80 kDa	37	17	25	46	31	30	32	32
adenosylhomocysteinase [Mycobacterium tuberculosis H37Rv]	NP_217765.1 (+2)	54 kDa	33	38	36	39	44	30	46	32
Cluster of serine protease PepD [Mycobacterium tuberculosis H37Rv] (NP_215498.1)	NP_215498.1 [2]	46 kDa	31	26	18	37	48	30	23	18
electron transfer flavoprotein subunit beta [Mycobacterium tuberculosis H37Rv]	NP_217545.1 (+3)	28 kDa	27	28	22	44	33	30	32	32
hypothetical protein Rv2140c [Mycobacterium tuberculosis H37Rv]	NP_216656.1 (+3)	19 kDa	27	33	25	20	19	30	40	32
glycogen accumulation regulator GarA [Mycobacterium orygis]	QOY50482.1	18 kDa	23	24	22	27	24	30	26	26
Cluster of transketolase [Mycobacterium orygis] (QOY50165.1)	QOY50165.1 [4]	76 kDa	23	26	25	24	30	30	29	30
two component transcriptional regulator PrrA [Mycobacterium tuberculosis H37Rv]	NP_215418.1 (+3)	25 kDa	23	21	18	10	14	30	32	18
enoyl-CoA hydratase EchA6 [Mycobacterium tuberculosis H37Rv]	NP_215420.1 (+3)	26 kDa	21	31	20	17	22	30	32	24
ATP synthase subunit alpha [Mycobacterium tuberculosis H37Rv]	NP_215824.1 (+3)	59 kDa	19	21	16	27	24	30	23	24
lipoprotein LprA [Mycobacterium tuberculosis H37Rv]	NP_215786.1 (+2)	25 kDa	19	19	13	24	33	30	23	22
DNA-binding protein HU [Mycobacterium tuberculosis H37Rv]	NP_217502.1 (+3)	22 kDa	19	12	13	2	5	30	17	32
DNA-directed RNA polymerase subunit beta' [Mycobacterium tuberculosis H37Rv]	NP_215182.1 (+3)	147 kDa	14	17	27	54	38	30	26	84
acetohydroxyacid synthase large subunit [Mycobacterium tuberculosis H37Rv]	NP_218026.1 (+3)	52 kDa	14	14	20	20	16	30	11	16
hypothetical protein Rv2927c [Mycobacterium tuberculosis H37Rv]	NP_217443.1 (+3)	27 kDa	12	2	4	15	12	30	20	22
PE family protein [Mycobacterium orygis]	QOY48457.1 (+2)	10 kDa	8	12	11	42	22	30	32	32
acyl-CoA dehydrogenase FadE25 [Mycobacterium tuberculosis H37Rv]	NP_217791.1 (+3)	42 kDa	8	17	13	27	18	30	26	32
Cluster of FHA domain-containing protein FhaA [Mycobacterium tuberculosis H37Rv] (NP_214534.1)	NP_214534.1 [3]	57 kDa	6	9	9	15	24	30	14	32
transcriptional regulator [Mycobacterium tuberculosis H37Rv]	NP_216774.1 (+3)	38 kDa	0	0	0	10	15	30	26	24
soluble secreted antigen Mpt53 [Mycobacterium tuberculosis H37Rv]	NP_217394.1 (+3)	18 kDa	79	78	76	54	39	27	26	26
adenylate kinase [Mycobacterium tuberculosis H37Rv]	NP_215247.1 (+3)	20 kDa	31	38	34	27	24	27	34	36
lipoprotein LppX [Mycobacterium tuberculosis H37Rv]	NP_217461.1 (+3)	24 kDa	27	31	22	42	33	27	29	22
ATP-dependent protease ATP-binding subunit ClpC [Mycobacterium orygis]	QOY48566.1 (+3)	94 kDa	25	26	31	42	30	27	40	40
ATP-dependent CLP protease proteolytic subunit 2 [Mycobacterium tuberculosis H37Rv]	NP_216976.1 (+3)	24 kDa	23	26	25	15	16	27	26	24
Cluster of maltokinase mak [Mycobacterium tuberculosis variant bovis AF2122/97] (CAB5247834.1)	CAB5247834.1 [4]	50 kDa	23	12	11	7	8	27	46	32
Cluster of ESX-1 secretion system protein EccA1 [Mycobacterium tuberculosis H37Rv] (NP_218385.1)	NP_218385.1 [4]	62 kDa	21	12	16	7	14	27	17	22
Cluster of lipoprotein LpqE [Mycobacterium tuberculosis H37Rv] (NP_218101.1)	NP_218101.1 [4]	19 kDa	19	19	20	22	22	27	26	26
ketol-acid reductoisomerase [Mycobacterium tuberculosis H37Rv]	NP_217517.3 (+3)	36 kDa	19	14	16	12	10	27	17	20
Cluster of hydroxymycolate synthase MmaA4 [Mycobacterium orygis] (QOY50633.1)	QOY50633.1 [4]	35 kDa	19	17	20	10	14	27	26	20
hypothetical protein Rv1794 [Mycobacterium tuberculosis H37Rv]	NP_216310.1 (+3)	32 kDa	19	24	18	2	11	27	26	24
cold shock protein A [Mycobacterium tuberculosis H37Rv]	NP_218165.1 (+3)	7 kDa	17	21	20	15	12	27	23	24
Cluster of thiosulfate sulfurtransferase SseA [Mycobacterium tuberculosis H37Rv] (NP_217800.1)	NP_217800.1 [4]	33 kDa	14	12	13	29	22	27	37	32
ABC transporter ATP-binding protein [Mycobacterium tuberculosis H37Rv]	NP_215979.1 (+3)	29 kDa	10	5	11	7	7	27	23	18
propionyl-CoA carboxylase subunit beta [Mycobacterium tuberculosis H37Rv]	NP_217797.1 (+2)	59 kDa	8	9	13	17	27	27	26	18
Cluster of possible lipoprotein lpro [Mycobacterium tuberculosis variant bovis AF2122/97] (CAB5247890.1)	CAB5247890.1 [4]	39 kDa	6	14	9	2	4	27	29	32
hypothetical protein Rv3572 [Mycobacterium tuberculosis H37Rv]	NP_218089.1 (+3)	19 kDa	46	54	45	32	26	24	23	22
glyceraldehyde 3-phosphate dehydrogenase [Mycobacterium tuberculosis H37Rv]	NP_215952.1 (+3)	36 kDa	29	24	25	24	24	24	34	28
two-component system transcriptional regulator [Mycobacterium tuberculosis H37Rv]	NP_216142.1 (+3)	23 kDa	23	17	20	20	20	24	20	26
50S ribosomal protein L9 [Mycobacterium tuberculosis H37Rv]	NP_214570.1 (+3)	16 kDa	23	19	29	17	15	24	34	20
adenosine kinase [Mycobacterium tuberculosis H37Rv]	NP_216718.1 (+3)	34 kDa	21	17	7	17	24	24	29	26
methyltransferase [Mycobacterium tuberculosis H37Rv]	NP_216219.4 (+2)	27 kDa	21	12	18	5	16	24	29	24
enoyl-CoA hydratase EchA3 [Mycobacterium tuberculosis H37Rv]	NP_215146.1 (+3)	24 kDa	19	21	11	20	20	24	20	26
UPF0234 protein Yitk [Mycobacterium tuberculosis variant bovis AF2122/97]	CAB5248289.1 (+3)	18 kDa	17	19	25	29	23	24	32	20
hydrolase [Mycobacterium tuberculosis H37Rv]	NP_217917.1 (+3)	28 kDa	17	14	13	12	14	24	20	16
PROBABLE ACETYL-COA ACYLTRANSFERASE FADA2 (3-KETOACYL-COA THIOLASE) (BETA-KETOTHIOLASE) [Mycobacterium tuberculosis variant bovis AF2122/97]	CAB5247955.1 (+3)	46 kDa	14	7	9	15	12	24	20	26
putative membrane protein [Mycobacterium tuberculosis variant bovis AF2122/97]	CAB5248169.1 (+3)	17 kDa	52	68	60	5	5	22	20	16
ESAT-6-like protein EsxG [Mycobacterium tuberculosis variant bovis AF2122/97]	CAB5248001.1 (+3)	10 kDa	43	38	36	76	46	22	23	26
Cluster of phosphopyruvate hydratase [Mycobacterium orygis] (QOY49776.1)	QOY49776.1 [4]	45 kDa	25	19	16	49	46	22	14	20
pyruvate dehydrogenase E2 component dihydrolipoamide acyltransferase [Mycobacterium tuberculosis H37Rv]	NP_216731.1 (+3)	57 kDa	23	17	20	49	38	22	9	30
ribosome recycling factor [Mycobacterium tuberculosis H37Rv]	NP_217398.1 (+3)	21 kDa	23	24	27	24	16	22	26	22
Cluster of PROBABLE CONSERVED SECRETED PROTEIN TB22.2 [Mycobacterium tuberculosis variant bovis AF2122/97] (SIU01687.1)	SIU01687.1 [4]	24 kDa	21	21	22	34	22	22	17	12
bifunctional protein acetyl-/propionyl-CoA carboxylase subunit alpha AccA [Mycobacterium tuberculosis H37Rv]	NP_217802.1 (+3)	64 kDa	19	14	25	105	65	22	17	36
ATP-dependent CLP protease proteolytic subunit ClpP1 [Mycobacterium orygis]	QOY47565.1 (+3)	22 kDa	19	19	20	20	10	22	20	20
hypothetical protein Rv2185c [Mycobacterium tuberculosis H37Rv]	NP_216701.1 (+3)	16 kDa	19	24	25	20	16	22	26	24
pterin-4-alpha-carbinolamine dehydratase [Mycobacterium tuberculosis H37Rv]	NP_215499.1 (+3)	18 kDa	19	24	16	15	16	22	26	14
2,3,4,5-tetrahydropyridine-2,6-dicarboxylate N-succinyltransferase [Mycobacterium tuberculosis H37Rv]	NP_215717.1 (+3)	33 kDa	17	9	4	17	15	22	17	14
class 1b ribonucleoside-diphosphate reductase subunit beta [Mycobacterium orygis]	QOY47135.1 (+3)	37 kDa	17	19	13	0	1	22	23	24
30S ribosomal protein S7 [Mycobacterium tuberculosis H37Rv]	NP_215197.1 (+3)	18 kDa	14	9	18	20	8	22	23	20
acid phosphatase [Mycobacterium tuberculosis H37Rv]	NP_217827.1 (+3)	32 kDa	14	17	20	17	10	22	26	20
POSSIBLE PROTEIN TRANSPORT PROTEIN SECE2 [Mycobacterium tuberculosis variant bovis AF2122/97]	CAB5248091.1 (+3)	8 kDa	14	12	13	15	14	22	20	26
Cluster of long-chain-fatty-acid--AMP ligase FadD28 [Mycobacterium tuberculosis H37Rv] (NP_217457.1)	NP_217457.1 [4]	63 kDa	14	9	13	10	7	22	17	24
Cluster of succinate--CoA ligase subunit alpha [Mycobacterium orygis] (QOY49717.1)	QOY49717.1 [3]	31 kDa	12	14	16	27	19	22	29	22
hypothetical protein Rv2466c [Mycobacterium tuberculosis H37Rv]	NP_216982.1 (+3)	23 kDa	10	19	16	7	4	22	23	22
50S ribosomal protein L3 [Mycobacterium tuberculosis H37Rv]	NP_215215.1 (+3)	23 kDa	10	12	16	2	1	22	6	16
pyruvate dehydrogenase (acetyl-transferring), homodimeric type [Mycobacterium tuberculosis]	gnl|extdb|pgaptmp_002383	103 kDa	8	17	18	42	34	22	20	36
nucleoside diphosphate kinase [Mycobacterium tuberculosis H37Rv]	NP_216961.1 (+3)	15 kDa	8	7	11	10	7	22	26	20
2-oxoglutarate oxidoreductase subunit KorB [Mycobacterium tuberculosis H37Rv]	NP_216970.1 (+3)	40 kDa	6	2	4	12	11	22	14	20
1,4-beta-xylanase [Mycobacterium orygis]	QOY48132.1	43 kDa	4	5	4	20	19	22	17	12
triosephosphate isomerase [Mycobacterium tuberculosis H37Rv]	NP_215954.1 (+3)	27 kDa	4	7	7	12	12	22	14	12
NADP-dependent alcohol dehydrogenase [Mycobacterium tuberculosis H37Rv]	NP_217561.1 (+3)	37 kDa	43	54	47	10	29	19	14	28
Cluster of PROBABLE FATTY-ACID-COA LIGASE FADD2 (FATTY-ACID-COA SYNTHETASE) (FATTY-ACID-COA SYNTHASE) [Mycobacterium tuberculosis variant bovis AF2122/97] (CAB5247982.1)	CAB5247982.1 [4]	60 kDa	33	28	27	32	33	19	11	20
POSSIBLE SECRETED PROTEIN [Mycobacterium tuberculosis variant bovis AF2122/97]	CAB5248110.1 (+3)	22 kDa	29	35	31	24	20	19	23	16
NDMA-dependent alcohol dehydrogenase [Mycobacterium orygis]	QOY49549.1 (+3)	40 kDa	29	14	22	10	20	19	20	28
30S ribosomal protein S6 [Mycobacterium tuberculosis H37Rv]	NP_214567.1 (+3)	11 kDa	23	24	20	20	12	19	17	26
Cluster of reductase [Mycobacterium tuberculosis H37Rv] (NP_216385.1)	NP_216385.1 [4]	44 kDa	19	26	18	20	18	19	26	26
carboxylesterase B [Mycobacterium tuberculosis H37Rv]	NP_216739.1 (+3)	55 kDa	19	14	20	15	8	19	23	30
transcription elongation factor GreA [Mycobacterium tuberculosis H37Rv]	NP_215596.1 (+3)	18 kDa	19	19	25	10	10	19	32	18
macrolide ABC transporter ATP-binding protein [Mycobacterium tuberculosis H37Rv]	NP_216993.1 (+3)	62 kDa	19	14	16	7	11	19	20	20
beta-1,3-glucanase [Mycobacterium tuberculosis H37Rv]	NP_214829.1	32 kDa	17	24	18	32	27	19	11	14
cellulase CelA [Mycobacterium orygis]	QOY48912.1 (+3)	40 kDa	17	24	20	24	18	19	26	18
hypothetical protein Rv2204c [Mycobacterium tuberculosis H37Rv]	NP_216720.1 (+3)	13 kDa	17	28	22	17	20	19	26	22
possible s-adenosylmethionine-dependent methyltransferase [Mycobacterium tuberculosis variant bovis AF2122/97]	CAB5247995.1 (+3)	33 kDa	17	17	20	12	3	19	29	24
Cluster of hypothetical protein Rv1860 [Mycobacterium tuberculosis H37Rv] (YP_177849.1)	YP_177849.1 [4]	33 kDa	14	7	9	76	31	19	3	36
DUF3107 domain-containing protein [Mycobacterium orygis]	QOY50811.1 (+3)	9 kDa	14	17	18	34	15	19	20	18
thioredoxin [Mycobacterium tuberculosis H37Rv]	NP_215840.1 (+3)	32 kDa	14	12	16	29	44	19	20	28
lipoprotein LprG [Mycobacterium tuberculosis H37Rv]	NP_215927.1 (+3)	25 kDa	14	17	4	5	10	19	23	18
30S ribosomal protein S16 [Mycobacterium tuberculosis H37Rv]	NP_217425.1 (+3)	17 kDa	12	12	9	10	10	19	17	20
3-isopropylmalate dehydratase small subunit [Mycobacterium tuberculosis H37Rv]	NP_217503.1 (+3)	22 kDa	12	7	9	10	11	19	17	18
hypothetical protein Rv1558 [Mycobacterium tuberculosis H37Rv]	NP_216074.1 (+3)	16 kDa	12	12	11	5	12	19	29	22
Cluster of phosphoglycerate kinase [Mycobacterium tuberculosis H37Rv] (NP_215953.1)	NP_215953.1 [4]	43 kDa	10	19	9	20	16	19	20	22
PROBABLE CHAPERONE PROTEIN DNAJ1 [Mycobacterium tuberculosis variant bovis AF2122/97]	CAB5248065.1 (+3)	41 kDa	10	7	7	10	10	19	9	12
type VII secretion system ESX-5 target PPE26 [Mycobacterium orygis]	QOY50454.1 (+3)	39 kDa	10	7	7	0	0	19	20	22
Cluster of acetyl-CoA C-acetyltransferase [Mycobacterium orygis] (QOY50683.1)	QOY50683.1 [2]	40 kDa	8	0	0	12	26	19	20	10
phosphate ABC transporter substrate-binding protein PstS [Mycobacterium orygis]	QOY49699.1 (+3)	38 kDa	8	9	11	12	18	19	20	10
PPE family protein [Mycobacterium orygis]	QOY47538.1 (+3)	22 kDa	6	7	9	7	12	19	29	26
PROBABLE NAD(P) TRANSHYDROGENASE (SUBUNIT ALPHA) PNTAa [FIRST PART; CATALYTIC PART] (PYRIDINE NUCLEOTIDE TRANSHYDROGENASE SUBUNIT ALPHA) (NICOTINAMIDE NUCLEOTIDE TRANSHYDROGENASE SUBUNIT ALPHA) [Mycobacterium tuberculosis variant bovis AF2122/97]	CAB5247865.1 (+3)	38 kDa	4	7	4	22	20	19	14	18
TIGR02569 family protein [Mycobacterium orygis]	QOY48222.1 (+1)	31 kDa	4	12	9	5	11	19	14	12
Cluster of 4-hydroxy-3-methylbut-2-en-1-yl diphosphate synthase [Mycobacterium tuberculosis H37Rv] (NP_217384.1)	NP_217384.1 [3]	40 kDa	2	0	2	20	29	19	23	18
pe family protein pe5 [Mycobacterium tuberculosis variant bovis AF2122/97]	CAB5247999.1 (+3)	10 kDa	29	24	25	34	18	16	17	16
resuscitation-promoting factor RpfC [Mycobacterium tuberculosis H37Rv]	NP_216400.1 (+3)	18 kDa	29	33	38	22	10	16	14	14
membrane protein [Mycobacterium tuberculosis H37Rv]	NP_217092.1 (+3)	16 kDa	25	24	27	22	15	16	14	12
Cluster of elongation factor G-like protein EF-G2 [Mycobacterium orygis] (QOY48964.1)	QOY48964.1 [3]	76 kDa	21	5	13	12	11	16	14	20
phosphate ABC transporter substrate-binding protein PstS [Mycobacterium orygis]	QOY49695.1 (+3)	38 kDa	17	24	25	12	12	16	26	24
30S ribosomal protein S5 [Mycobacterium tuberculosis H37Rv]	NP_215235.1 (+3)	23 kDa	12	19	18	10	8	16	20	20
iron-regulated short-chain dehydrogenase/reductase [Mycobacterium tuberculosis H37Rv]	NP_217740.1 (+3)	30 kDa	10	14	11	22	27	16	11	18
Cluster of quinone-dependent L-lactate dehydrogenase [Mycobacterium orygis] (QOY50525.1)	QOY50525.1 [4]	45 kDa	10	17	7	15	10	16	20	12
phosphoserine aminotransferase [Mycobacterium tuberculosis H37Rv]	NP_215399.1 (+3)	40 kDa	8	5	4	20	31	16	14	14
quinone reductase [Mycobacterium tuberculosis H37Rv]	NP_215970.1 (+3)	34 kDa	8	2	4	17	22	16	11	10
S-adenosylmethionine-dependent methyltransferase [Mycobacterium tuberculosis H37Rv]	NP_215245.1 (+3)	35 kDa	8	19	13	12	8	16	17	16
30S ribosomal protein S10 [Mycobacterium tuberculosis H37Rv]	NP_215214.1 (+3)	11 kDa	8	12	9	12	10	16	11	12
3-hydroxybutyryl-coa dehydrogenase fadb2 (beta-hydroxybutyryl-coa dehydrogenase) (bhbd) [Mycobacterium tuberculosis variant bovis AF2122/97]	CAB5248184.1 (+3)	31 kDa	6	7	9	20	12	16	23	8
Cluster of acyl-CoA dehydrogenase FadE10 [Mycobacterium tuberculosis H37Rv] (NP_215388.1)	NP_215388.1 [4]	71 kDa	6	5	4	17	14	16	14	16
heme-degrading monooxygenase [Mycobacterium tuberculosis H37Rv]	NP_218109.1 (+3)	11 kDa	6	12	9	17	11	16	9	18
oxidoreductase [Mycobacterium tuberculosis H37Rv]	NP_215660.1 (+3)	26 kDa	6	2	9	15	22	16	14	14
50S ribosomal protein L15 [Mycobacterium tuberculosis H37Rv]	NP_215237.1 (+3)	16 kDa	6	7	2	12	8	16	11	14
beta-carbonic anhydrase [Mycobacterium tuberculosis H37Rv]	NP_215800.1 (+3)	18 kDa	6	5	7	10	10	16	17	14
hypothetical protein Rv2694c [Mycobacterium tuberculosis H37Rv]	NP_217210.1 (+1)	14 kDa	6	5	4	5	8	16	11	10
6-phosphofructokinase [Mycobacterium tuberculosis H37Rv]	NP_217526.1 (+3)	37 kDa	6	7	4	2	5	16	14	10
cystathionine beta-synthase [Mycobacterium orygis]	QOY49820.1 (+3)	49 kDa	4	5	4	15	20	16	11	12
Cluster of hypothetical protein Rv0925c [Mycobacterium tuberculosis H37Rv] (NP_215440.1)	NP_215440.1 [4]	27 kDa	2	5	9	20	16	16	9	10
FAD-binding oxidoreductase [Mycobacterium orygis]	QOY47407.1 (+2)	48 kDa	0	2	0	22	34	16	9	12
POSSIBLE EXPORTED ALANINE AND VALINE RICH PROTEIN [Mycobacterium tuberculosis variant bovis AF2122/97]	SIU01305.1	18 kDa	31	40	38	2	0	13	9	12
Cluster of type VII secretion system ESX-1 associated protein EspF [Mycobacterium orygis] (QOY48800.1)	QOY48800.1 [4]	11 kDa	21	21	16	15	5	13	17	16
tryptophan synthase subunit alpha [Mycobacterium tuberculosis H37Rv]	NP_216129.1 (+3)	28 kDa	21	14	9	10	7	13	14	14
peptidoglycan endopeptidase RipB [Mycobacterium tuberculosis H37Rv]	NP_215994.1 (+3)	25 kDa	19	17	22	20	12	13	23	18
Cluster of tryptophan synthase subunit beta [Mycobacterium orygis] (QOY50303.1)	QOY50303.1 [4]	45 kDa	14	7	16	10	14	13	11	12
PROBABLE PHOSPHOGLYCERATE MUTASE 1 GPM1 (PHOSPHOGLYCEROMUTASE) (PGAM) (BPG-DEPENDENT PGAM) [Mycobacterium tuberculosis variant bovis AF2122/97]	CAB5248206.1 (+3)	27 kDa	14	7	4	7	19	13	17	8
50S ribosomal protein L4 [Mycobacterium tuberculosis H37Rv]	NP_215216.1 (+3)	24 kDa	12	12	16	12	8	13	17	16
Cluster of class I SAM-dependent methyltransferase [Mycobacterium orygis] (QOY50591.1)	QOY50591.1 [12]	34 kDa	12	5	7	7	7	13	20	20
GCN5-like N-acetyltransferase [Mycobacterium tuberculosis H37Rv]	NP_215244.1 (+1)	26 kDa	12	9	11	7	10	13	17	16
ribose-5-phosphate isomerase [Mycobacterium orygis]	QOY47569.1 (+3)	17 kDa	12	12	9	2	8	13	20	10
POSSIBLE CONSERVED MEMBRANE PROTEIN [Mycobacterium tuberculosis variant bovis AF2122/97]	CAB5248239.1 (+1)	31 kDa	12	14	11	0	1	13	14	18
aspartate-semialdehyde dehydrogenase [Mycobacterium tuberculosis H37Rv]	NP_218225.1 (+3)	36 kDa	10	14	9	10	8	13	6	6
hypothetical protein Rv3099c [Mycobacterium tuberculosis H37Rv]	NP_217615.1 (+3)	31 kDa	10	14	16	7	5	13	14	16
TIGR03667 family PPOX class F420-dependent oxidoreductase [Mycobacterium orygis]	QOY48367.1 (+1)	15 kDa	10	12	13	7	8	13	11	10
mycoredoxin Mrx1 [Mycobacterium orygis]	QOY48214.1 (+3)	9 kDa	10	12	7	2	4	13	9	8
oxidoreductase [Mycobacterium tuberculosis H37Rv]	NP_216371.1 (+3)	33 kDa	10	7	4	2	10	13	20	14
bifunctional phosphoribosylaminoimidazolecarboxamide formyltransferase/inosinemonophosphate cyclohydrolase [Mycobacterium tuberculosis H37Rv]	NP_215472.1 (+3)	55 kDa	8	7	9	15	29	13	11	10
30S ribosomal protein S9 [Mycobacterium tuberculosis H37Rv]	NP_217959.1 (+3)	16 kDa	8	12	9	15	10	13	17	14
2-oxoglutarate oxidoreductase subunit KorA [Mycobacterium tuberculosis H37Rv]	NP_216971.1 (+3)	69 kDa	8	5	4	12	12	13	14	24
iron-dependent repressor and activator IdeR [Mycobacterium tuberculosis H37Rv]	NP_217227.1 (+3)	25 kDa	8	9	7	12	12	13	11	10
transcription termination/antitermination protein NusG [Mycobacterium tuberculosis H37Rv]	NP_215153.1 (+3)	25 kDa	8	12	7	10	8	13	11	14
Cluster of hypothetical protein Rv3718c [Mycobacterium tuberculosis H37Rv] (NP_218235.1)	NP_218235.1 [4]	16 kDa	8	5	7	7	8	13	17	20
MBL fold metallo-hydrolase [Mycobacterium orygis]	QOY50702.1 (+1)	24 kDa	8	9	7	5	20	13	11	8
Cluster of siderophore-interacting protein [Mycobacterium orygis] (QOY47948.1)	QOY47948.1 [4]	31 kDa	8	12	16	2	10	13	17	12
bifunctional oligoribonuclease/PAP phosphatase NrnA [Mycobacterium tuberculosis H37Rv]	NP_217353.1 (+3)	35 kDa	8	7	9	0	3	13	17	10
Cluster of 2-isopropylmalate synthase leua (alpha-isopropylmalate synthase) (alpha-ipm synthetase) (ipms) [Mycobacterium tuberculosis variant bovis AF2122/97] (SIU02366.1)	SIU02366.1 [2]	76 kDa	6	7	4	17	16	13	9	10
fumarylacetoacetate hydrolase family protein [Mycobacterium orygis]	QOY48037.1 (+1)	28 kDa	6	7	7	15	5	13	11	10
ESX-1 secretion-associated protein EspK [Mycobacterium tuberculosis H37Rv]	NP_218396.1 (+3)	74 kDa	6	9	13	12	7	13	9	34
30S ribosomal protein S13 [Mycobacterium tuberculosis H37Rv]	NP_217977.1 (+3)	14 kDa	6	9	9	7	5	13	17	10
peptide chain release factor PrfB [Mycobacterium tuberculosis H37Rv]	NP_217621.1 (+3)	42 kDa	6	2	4	5	10	13	6	6
enoyl-CoA hydratase EchA16 [Mycobacterium tuberculosis H37Rv]	NP_217347.1 (+2)	27 kDa	4	7	4	20	20	13	11	10
hypothetical protein Rv3688c [Mycobacterium tuberculosis H37Rv]	NP_218205.1 (+3)	17 kDa	4	9	11	7	4	13	14	12
UDP-glucose 4-epimerase [Mycobacterium tuberculosis H37Rv]	NP_215015.2 (+3)	34 kDa	4	9	7	5	10	13	9	4
hypothetical protein Rv0854 [Mycobacterium tuberculosis H37Rv]	NP_215369.1 (+3)	16 kDa	4	7	4	5	5	13	9	8
Cluster of DNA-directed RNA polymerase subunit beta [Mycobacterium tuberculosis H37Rv] (NP_215181.1)	NP_215181.1 [4]	129 kDa	2	2	11	39	16	13	11	44
50S ribosomal protein L20 [Mycobacterium tuberculosis H37Rv]	NP_216159.1 (+3)	15 kDa	2	5	4	17	10	13	11	10
6-phosphogluconate dehydrogenase [Mycobacterium tuberculosis H37Rv]	NP_215638.1 (+3)	36 kDa	2	0	0	10	14	13	6	6
PROBABLE SUCCINATE DEHYDROGENASE [IRON-SULFUR SUBUNIT] (SUCCINIC DEHYDROGENASE) [Mycobacterium tuberculosis variant bovis AF2122/97]	CAB5247959.1 (+3)	29 kDa	2	7	7	2	1	13	14	14
carbonic anhydrase [Mycobacterium tuberculosis H37Rv]	NP_218105.1 (+3)	22 kDa	2	7	4	0	4	13	14	10
Cluster of hypothetical protein Rv2696c [Mycobacterium tuberculosis H37Rv] (NP_217212.1)	NP_217212.1 [4]	27 kDa	0	0	0	7	5	13	11	10
adenylosuccinate lyase PurB [Mycobacterium tuberculosis H37Rv]	NP_215291.1 (+3)	51 kDa	0	0	0	0	3	13	0	2
cutinase [Mycobacterium tuberculosis H37Rv]	NP_216817.2 (+3)	24 kDa	31	31	31	37	22	11	17	18
probable zinc metalloprotease zmp1 [Mycobacterium tuberculosis variant bovis AF2122/97]	CAB5247910.1 (+3)	74 kDa	21	9	7	15	16	11	17	26
Cluster of thioredoxin-disulfide reductase [Mycobacterium orygis] (QOY48841.1)	QOY48841.1 [4]	36 kDa	21	19	16	10	10	11	17	12
Cluster of (3r)-hydroxyacyl-acp dehydratase subunit hadb [Mycobacterium tuberculosis variant bovis AF2122/97] (SIT99253.1)	SIT99253.1 [4]	15 kDa	19	28	27	22	19	11	23	18
cutinase family protein [Mycobacterium orygis]	QOY48677.1 (+2)	23 kDa	19	19	29	0	0	11	9	8
acyl-ACP desaturase DesA [Mycobacterium tuberculosis H37Rv]	NP_215610.1 (+3)	31 kDa	17	7	11	29	37	11	23	16
methoxy mycolic acid synthase MmaA3 [Mycobacterium tuberculosis H37Rv]	NP_215157.1 (+3)	33 kDa	17	19	16	5	5	11	20	12
Cluster of fatty-acid-amp ligase fadd32 (fatty-acid-amp synthetase) (fatty-acid-amp synthase). also shown to have acyl-acp ligase activity [Mycobacterium tuberculosis variant bovis AF2122/97] (SIU02460.1)	SIU02460.1 [3]	69 kDa	14	5	7	15	7	11	3	24
hypothetical protein Rv3651 [Mycobacterium tuberculosis H37Rv]	NP_218168.1 (+3)	38 kDa	14	14	13	15	8	11	0	8
thiol peroxidase [Mycobacterium tuberculosis H37Rv]	NP_216448.1 (+3)	17 kDa	12	12	13	37	26	11	11	16
pyruvate kinase [Mycobacterium tuberculosis H37Rv]	NP_216133.1 (+2)	51 kDa	12	9	9	27	27	11	6	8
hypothetical protein Rv2668 [Mycobacterium tuberculosis H37Rv]	NP_217184.1	18 kDa	12	24	20	17	10	11	6	6
30S ribosomal protein S3 [Mycobacterium tuberculosis H37Rv]	NP_215221.1 (+3)	30 kDa	12	9	16	10	3	11	9	12
hypothetical protein Rv2302 [Mycobacterium tuberculosis H37Rv]	NP_216818.1 (+3)	9 kDa	12	7	7	10	8	11	11	10
transcriptional regulator [Mycobacterium tuberculosis H37Rv]	NP_215920.1 (+3)	18 kDa	12	14	16	10	5	11	14	12
hypothetical protein Rv3699 [Mycobacterium tuberculosis H37Rv]	NP_218216.1 (+3)	25 kDa	12	9	13	7	7	11	11	12
FeIII-dicitrate-binding periplasmic lipoprotein [Mycobacterium tuberculosis H37Rv]	NP_217560.1 (+3)	37 kDa	12	9	4	7	11	11	3	6
transcription termination/antitermination protein NusA [Mycobacterium tuberculosis H37Rv]	NP_217357.1 (+3)	38 kDa	12	12	4	2	12	11	14	16
27 kDa antigen Cfp30B [Mycobacterium tuberculosis variant bovis AF2122/97]	CAB5248301.1 (+3)	27 kDa	10	2	4	22	14	11	6	8
50S ribosomal protein L11 [Mycobacterium tuberculosis H37Rv]	NP_215154.1 (+3)	15 kDa	10	9	7	7	8	11	14	6
glycine cleavage system aminomethyltransferase GcvT [Mycobacterium orygis]	QOY47343.1 (+1)	38 kDa	10	9	7	7	5	11	11	12
initiation factor IF-3 [Mycobacterium tuberculosis H37Rv]	NP_216157.1 (+3)	22 kDa	10	2	7	5	8	11	11	14
methionine--tRNA ligase [Mycobacterium orygis]	QOY49764.1 (+2)	58 kDa	10	12	7	5	20	11	14	16
haloalkane dehalogenase [Mycobacterium orygis]	QOY47670.1 (+2)	34 kDa	10	9	13	2	11	11	14	12
transmembrane protein [Mycobacterium tuberculosis H37Rv]	NP_215194.1 (+3)	13 kDa	10	17	18	2	1	11	11	6
Cluster of fatty-acid-amp ligase fadd26 (fatty-acid-amp synthetase) (fatty-acid-amp synthase) [Mycobacterium tuberculosis variant bovis AF2122/97] (SIU01576.1)	SIU01576.1 [3]	63 kDa	10	5	2	0	0	11	3	8
Cluster of transcription termination factor Rho [Mycobacterium tuberculosis H37Rv] (NP_215813.1)	NP_215813.1 [4]	65 kDa	8	5	7	12	12	11	11	14
PspA/IM30 family protein [Mycobacterium orygis]	QOY47813.1 (+2)	29 kDa	8	2	9	10	15	11	9	8
Cluster of class I SAM-dependent methyltransferase [Mycobacterium orygis] (QOY50634.1)	QOY50634.1 [4]	33 kDa	8	9	7	7	10	11	9	14
Cluster of hypothetical protein Rv2699c [Mycobacterium tuberculosis H37Rv] (NP_217215.1)	NP_217215.1 [4]	11 kDa	8	9	7	7	11	11	14	8
molybdenum cofactor guanylyltransferase [Mycobacterium tuberculosis H37Rv]	NP_216969.1 (+3)	21 kDa	8	12	13	5	11	11	14	16
Cluster of class I SAM-dependent methyltransferase [Mycobacterium orygis] (QOY48384.1)	QOY48384.1 [4]	32 kDa	8	9	7	2	5	11	6	4
Cluster of PUTATIVE TUBERCULIN RELATED PEPTIDE [Mycobacterium tuberculosis variant bovis AF2122/97] (CAB5248145.1)	CAB5248145.1 [2]	17 kDa	8	7	11	0	1	11	3	10
oxidoreductase [Mycobacterium tuberculosis H37Rv]	NP_217885.1 (+3)	24 kDa	8	5	7	0	1	11	9	8
PROBABLE GLUTAMINE-BINDING LIPOPROTEIN GLNH (GLNBP) [Mycobacterium tuberculosis variant bovis AF2122/97]	CAB5248125.1 (+3)	35 kDa	6	12	9	10	19	11	6	8
hypothetical protein Rv1780 [Mycobacterium tuberculosis H37Rv]	NP_216296.1 (+3)	20 kDa	6	2	4	7	3	11	11	12
Cluster of 30S ribosomal protein S11 [Mycobacterium orygis] (QOY48446.1)	QOY48446.1 [4]	15 kDa	6	5	0	5	3	11	9	8
Cluster of leucyl aminopeptidase [Mycobacterium orygis] (QOY47345.1)	QOY47345.1 [4]	53 kDa	6	9	11	2	7	11	9	10
aminotransferase [Mycobacterium tuberculosis H37Rv]	NP_218295.1 (+3)	42 kDa	6	9	4	0	5	11	9	12
Cluster of PROBABLE DIHYDROXY-ACID DEHYDRATASE ILVD (DAD) [Mycobacterium tuberculosis variant bovis AF2122/97] (CAB5247901.1)	CAB5247901.1 [4]	59 kDa	4	0	2	15	16	11	9	6
30S ribosomal protein S17 [Mycobacterium tuberculosis H37Rv]	NP_215224.1 (+3)	15 kDa	4	7	4	15	8	11	14	8
universal stress protein [Mycobacterium tuberculosis H37Rv]	NP_217139.1 (+3)	32 kDa	4	5	2	7	5	11	14	6
bacterioferritin BfrA [Mycobacterium tuberculosis H37Rv]	NP_216392.1 (+3)	18 kDa	4	5	7	5	1	11	11	10
50S ribosomal protein L17 [Mycobacterium tuberculosis H37Rv]	NP_217973.1 (+3)	19 kDa	4	5	7	5	8	11	9	12
30S ribosomal protein S20 [Mycobacterium tuberculosis H37Rv]	NP_216928.1 (+3)	9 kDa	4	2	2	5	3	11	11	6
3-isopropylmalate dehydratase large subunit [Mycobacterium orygis]	QOY48033.1 (+1)	50 kDa	4	5	7	0	3	11	6	12
glucose-6-phosphate isomerase [Mycobacterium tuberculosis H37Rv]	NP_215461.1 (+3)	60 kDa	2	2	2	27	23	11	6	12
enoyl-CoA hydratase EchA8 [Mycobacterium tuberculosis H37Rv]	NP_215586.1 (+3)	27 kDa	2	2	0	15	18	11	11	10
Cluster of oxidoreductase [Mycobacterium tuberculosis H37Rv] (NP_216372.1)	NP_216372.1 [4]	23 kDa	2	2	2	10	3	11	11	6
Cluster of proline--tRNA ligase [Mycobacterium tuberculosis H37Rv] (NP_217361.1)	NP_217361.1 [4]	63 kDa	2	0	0	7	12	11	9	12
hypothetical protein Rv2676c [Mycobacterium tuberculosis H37Rv]	NP_217192.1 (+3)	26 kDa	2	5	2	7	11	11	11	10
prephenate dehydrogenase [Mycobacterium orygis]	QOY48699.1	33 kDa	2	5	2	5	7	11	9	10
Cluster of zinc uptake transcriptional repressor Zur [Mycobacterium orygis] (QOY47475.1)	QOY47475.1 [2]	14 kDa	2	5	7	0	5	11	0	8
adenylyltransferase/sulfurtransferase MoeZ [Mycobacterium orygis]	QOY48223.1 (+3)	42 kDa	2	5	2	0	3	11	14	4
transport system kinase [Mycobacterium tuberculosis H37Rv]	NP_216012.1 (+3)	36 kDa	2	2	0	0	7	11	9	10
hypothetical protein Rv1769 [Mycobacterium tuberculosis H37Rv]	NP_216285.1 (+2)	45 kDa	0	2	2	5	5	11	3	2
unknown protein [Mycobacterium tuberculosis variant bovis AF2122/97]	SIT99633.1	61 kDa	0	0	0	0	3	11	3	6
Cluster of PROBABLE OXALYL-COA DECARBOXYLASE OXCA [Mycobacterium tuberculosis variant bovis AF2122/97] (CAB5247824.1)	CAB5247824.1 [4]	61 kDa	0	2	2	0	0	11	11	4
membrane protein [Mycobacterium tuberculosis H37Rv]	NP_217315.1 (+1)	23 kDa	31	31	29	7	8	8	6	2
hypothetical protein Rv0774c [Mycobacterium tuberculosis H37Rv]	NP_215288.2 (+3)	31 kDa	29	26	22	5	10	8	9	8
glycosyl hydrolase [Mycobacterium tuberculosis H37Rv]	NP_215612.1 (+3)	31 kDa	23	24	25	34	20	8	6	6
SRPBCC family protein [Mycobacterium orygis]	QOY49000.1 (+1)	16 kDa	17	14	13	2	3	8	9	10
thioesterase TesA [Mycobacterium tuberculosis H37Rv]	NP_217444.1 (+3)	29 kDa	14	7	11	5	14	8	3	16
Cluster of S-adenosylmethionine-dependent methyltransferase [Mycobacterium tuberculosis H37Rv] (NP_217916.1)	NP_217916.1 [2]	38 kDa	14	9	7	0	5	8	11	8
two component system response transcriptional positive regulator PhoP [Mycobacterium tuberculosis H37Rv]	NP_215271.1 (+3)	28 kDa	12	9	2	5	3	8	6	10
hypothetical protein Rv0814c [Mycobacterium tuberculosis H37Rv]	NP_215329.1 (+5)	10 kDa	10	9	9	37	45	8	9	8
NADP-dependent succinic semialdehyde dehydrogenase [Mycobacterium orygis]	QOY49066.1 (+1)	49 kDa	10	9	11	10	15	8	9	12
enoyl-CoA hydratase EchA9 [Mycobacterium tuberculosis H37Rv]	NP_215587.1 (+3)	36 kDa	10	12	9	10	14	8	17	10
MYCOLIC ACID SYNTHASE PCAA (CYCLOPROPANE SYNTHASE) [Mycobacterium tuberculosis variant bovis AF2122/97]	CAB5248186.1 (+3)	33 kDa	10	7	7	7	7	8	9	12
hypothetical protein Rv0040c [Mycobacterium tuberculosis H37Rv]	NP_214554.2 (+2)	32 kDa	8	14	11	17	20	8	0	8
50S ribosomal protein L6 [Mycobacterium tuberculosis H37Rv]	NP_215233.1 (+3)	19 kDa	8	2	4	12	11	8	6	8
ECF RNA polymerase sigma factor SigH [Mycobacterium tuberculosis H37Rv]	NP_217739.1 (+3)	24 kDa	8	0	2	12	11	8	0	2
cysteine desulfurase [Mycobacterium tuberculosis H37Rv]	NP_215980.1 (+3)	45 kDa	8	9	7	12	12	8	9	16
hypothetical protein Rv1352 [Mycobacterium tuberculosis H37Rv]	NP_215868.1 (+3)	13 kDa	8	9	11	12	7	8	9	8
Cluster of transmembrane protein [Mycobacterium tuberculosis H37Rv] (NP_216861.1)	NP_216861.1 [4]	70 kDa	8	7	11	10	11	8	6	8
uridylate kinase [Mycobacterium tuberculosis H37Rv]	NP_217399.1 (+3)	27 kDa	8	7	0	7	4	8	9	10
aspartokinase [Mycobacterium tuberculosis H37Rv]	NP_218226.1 (+3)	44 kDa	8	9	11	2	3	8	9	12
oxidoreductase [Mycobacterium tuberculosis H37Rv]	NP_214558.1 (+3)	29 kDa	8	5	4	2	4	8	11	6
acylphosphatase [Mycobacterium orygis]	QOY47972.1 (+3)	10 kDa	8	5	9	2	4	8	6	6
class 1b ribonucleoside-diphosphate reductase subunit beta [Mycobacterium orygis]	QOY48087.1 (+3)	37 kDa	8	7	4	0	7	8	11	10
hypoxanthine-guanine phosphoribosyltransferase [Mycobacterium tuberculosis H37Rv]	NP_218141.1 (+3)	24 kDa	8	12	7	0	5	8	14	6
hypothetical protein Rv3716c [Mycobacterium tuberculosis H37Rv]	NP_218233.1 (+3)	13 kDa	6	7	7	22	11	8	6	6
PROBABLE O-METHYLTRANSFERASE [Mycobacterium tuberculosis variant bovis AF2122/97]	CAB5247899.1 (+3)	23 kDa	6	2	7	10	8	8	14	8
PPE family protein [Mycobacterium orygis]	QOY50109.1 (+3)	55 kDa	6	7	7	10	7	8	3	2
arginine--tRNA ligase [Mycobacterium tuberculosis H37Rv]	NP_215808.1 (+3)	60 kDa	6	5	2	7	16	8	9	12
PROBABLE ACYL-COA DEHYDROGENASE FADE6 [Mycobacterium tuberculosis variant bovis AF2122/97]	CAB5247983.1 (+3)	78 kDa	6	2	4	5	7	8	6	6
type I methionyl aminopeptidase [Mycobacterium orygis]	QOY47916.1 (+3)	31 kDa	6	7	7	5	7	8	6	8
hypothetical protein Rv2114 [Mycobacterium tuberculosis H37Rv]	NP_216630.1 (+3)	23 kDa	6	5	4	2	8	8	9	8
chorismate synthase [Mycobacterium tuberculosis H37Rv]	NP_217056.1 (+3)	42 kDa	6	0	2	2	4	8	3	4
translation initiation factor IF-1 [Mycobacterium tuberculosis H37Rv]	NP_217979.1 (+3)	8 kDa	6	5	7	2	5	8	11	16
DegV domain-containing protein [Mycobacterium tuberculosis H37Rv]	NP_216933.1 (+3)	28 kDa	6	2	2	2	0	8	0	6
PROBABLE EXODEOXYRIBONUCLEASE III PROTEIN XTHA (EXONUCLEASE III) (EXO III) (AP ENDONUCLEASE VI) [Mycobacterium tuberculosis variant bovis AF2122/97]	CAB5248141.1 (+1)	32 kDa	6	7	0	2	5	8	3	2
lipoprotein LpqD [Mycobacterium tuberculosis H37Rv]	NP_217907.1 (+3)	25 kDa	6	0	2	0	4	8	9	8
dTDP-4-dehydrorhamnose 3,5-epimerase [Mycobacterium tuberculosis H37Rv]	NP_217982.1 (+3)	22 kDa	6	9	4	0	5	8	6	4
cytochrome c biogenesis protein DipZ [Mycobacterium orygis]	QOY47930.1 (+2)	62 kDa	6	2	2	0	0	8	6	10
signal recognition particle protein [Mycobacterium tuberculosis H37Rv]	NP_217432.1 (+3)	55 kDa	4	5	7	15	10	8	9	8
Cluster of 3-isopropylmalate dehydrogenase [Mycobacterium orygis] (QOY50797.1)	QOY50797.1 [4]	35 kDa	4	0	4	12	19	8	6	8
hypothetical protein Rv3780 [Mycobacterium tuberculosis H37Rv]	NP_218297.1 (+3)	20 kDa	4	7	7	12	5	8	6	6
NDP-sugar synthase [Mycobacterium orygis]	QOY48274.1 (+3)	38 kDa	4	5	2	7	5	8	9	4
Cluster of 4-hydroxy-tetrahydrodipicolinate reductase [Mycobacterium tuberculosis H37Rv] (NP_217289.1)	NP_217289.1 [4]	26 kDa	4	5	4	7	10	8	11	8
elongation factor P [Mycobacterium tuberculosis H37Rv]	NP_217050.1 (+3)	20 kDa	4	5	2	5	5	8	11	10
DUF5130 domain-containing protein [Mycobacterium orygis]	QOY47572.1 (+1)	16 kDa	4	5	2	5	7	8	9	4
50S ribosomal protein L21 [Mycobacterium tuberculosis H37Rv]	NP_216958.1 (+3)	11 kDa	4	5	4	5	1	8	6	4
protease [Mycobacterium tuberculosis H37Rv]	NP_217188.1 (+3)	54 kDa	4	2	0	5	11	8	9	4
hypothetical protein Rv2680 [Mycobacterium tuberculosis H37Rv]	NP_217196.1 (+3)	23 kDa	4	5	7	2	0	8	6	6
Cluster of 4-hydroxy-tetrahydrodipicolinate synthase [Mycobacterium tuberculosis H37Rv] (NP_217269.1)	NP_217269.1 [4]	31 kDa	4	7	7	2	16	8	14	6
malonyl CoA-acyl carrier protein transacylase [Mycobacterium tuberculosis H37Rv]	NP_216759.1 (+3)	31 kDa	4	0	0	0	4	8	9	8
ribonucleoside-diphosphate reductase subunit beta NrdB [Mycobacterium tuberculosis H37Rv]	NP_214747.1	36 kDa	4	5	4	0	0	8	9	8
phosphoribosylamine--glycine ligase [Mycobacterium tuberculosis H37Rv]	NP_215286.1 (+2)	44 kDa	4	2	0	0	1	8	6	8
hypothetical protein Rv2257c [Mycobacterium tuberculosis H37Rv]	NP_216773.1 (+3)	28 kDa	4	0	2	0	4	8	11	8
4a-hydroxytetrahydrobiopterin dehydratase [Mycobacterium orygis]	QOY49893.1 (+3)	10 kDa	4	2	9	0	1	8	11	10
leucine--tRNA ligase [Mycobacterium tuberculosis H37Rv]	NP_214555.1 (+3)	108 kDa	2	0	4	27	18	8	9	24
threonine--tRNA ligase [Mycobacterium tuberculosis H37Rv]	NP_217130.1 (+3)	77 kDa	2	2	2	15	12	8	6	14
gamma-glutamyl phosphate reductase [Mycobacterium tuberculosis H37Rv]	NP_216943.1 (+3)	44 kDa	2	2	2	12	16	8	6	4
hypothetical protein Rv2229c [Mycobacterium tuberculosis H37Rv]	NP_216745.1 (+2)	27 kDa	2	2	4	12	14	8	11	12
Cluster of 30S ribosomal protein S2 [Mycobacterium tuberculosis H37Rv] (NP_217406.1)	NP_217406.1 [4]	31 kDa	2	2	4	10	7	8	9	8
epoxide hydrolase [Mycobacterium tuberculosis H37Rv]	NP_217256.1 (+3)	17 kDa	2	2	2	10	7	8	11	6
alpha-crystallin [Mycobacterium tuberculosis H37Rv]	NP_216547.1 (+3)	16 kDa	2	0	0	10	16	8	3	6
Cluster of PROBABLE BIFUNCTIONAL PROTEIN FOLD: METHYLENETETRAHYDROFOLATE DEHYDROGENASE + METHENYLTETRAHYDROFOLATE CYCLOHYDROLASE [Mycobacterium tuberculosis variant bovis AF2122/97] (SIU02020.1)	SIU02020.1 [4]	29 kDa	2	5	4	7	11	8	6	8
30S ribosomal protein S4 [Mycobacterium tuberculosis H37Rv]	NP_217975.1 (+3)	23 kDa	2	5	0	2	1	8	0	6
deazaflavin-dependent nitroreductase [Mycobacterium tuberculosis H37Rv]	NP_218064.1 (+3)	17 kDa	2	0	2	0	3	8	6	4
NAD(P)/FAD-dependent oxidoreductase [Mycobacterium orygis]	QOY49580.1 (+2)	52 kDa	0	0	0	15	12	8	11	8
enoyl-CoA hydratase EchA15 [Mycobacterium tuberculosis H37Rv]	NP_217195.1 (+3)	30 kDa	0	2	2	5	8	8	6	4
transmembrane cation transporter [Mycobacterium tuberculosis H37Rv]	NP_217716.1 (+3)	38 kDa	0	2	4	5	5	8	3	8
adenosine deaminase [Mycobacterium tuberculosis H37Rv]	NP_217830.1 (+3)	40 kDa	0	0	2	2	5	8	6	4
Cluster of phosphoribosylglycinamide formyltransferase PurN [Mycobacterium tuberculosis H37Rv] (NP_215471.1)	NP_215471.1 [4]	22 kDa	0	2	2	2	3	8	3	6
50S ribosomal protein L18 [Mycobacterium tuberculosis H37Rv]	NP_215234.1 (+3)	13 kDa	0	0	2	0	1	8	9	6
Cluster of acyl-CoA dehydrogenase [Mycobacterium orygis] (QOY49734.1)	QOY49734.1 [4]	42 kDa	0	0	2	0	1	8	9	6
carboxylesterase A [Mycobacterium tuberculosis H37Rv]	NP_216740.1 (+3)	56 kDa	0	0	0	0	5	8	6	4
oxidoreductase [Mycobacterium tuberculosis H37Rv]	NP_216645.1 (+3)	31 kDa	0	0	0	0	5	8	3	8
hypothetical protein Rv1480 [Mycobacterium tuberculosis H37Rv]	NP_215996.1 (+3)	34 kDa	0	5	0	0	0	8	6	8
ribonuclease VapC35 [Mycobacterium tuberculosis H37Rv]	NP_216478.1 (+3)	15 kDa	0	0	0	0	0	8	11	10
molybdopterin converting factor subunit 1 [Mycobacterium orygis]	QOY48331.1 (+3)	24 kDa	0	7	7	0	0	8	6	2
PPE family protein [Mycobacterium orygis]	QOY48155.1 (+2)	38 kDa	0	0	2	0	0	8	0	6
hypothetical protein Rv3747 [Mycobacterium tuberculosis H37Rv]	NP_218264.1 (+3)	14 kDa	23	26	18	10	8	5	3	8
acyl-CoA dehydrogenase FadE5 [Mycobacterium tuberculosis H37Rv]	NP_214758.1 (+2)	66 kDa	14	7	9	15	11	5	9	8
UDP-N-acetylmuramoylalanyl-D-glutamate--2,6-diaminopimelate ligase [Mycobacterium tuberculosis H37Rv]	NP_216674.1 (+3)	55 kDa	14	2	2	10	16	5	11	10
possible mycolic acid synthase umaa [Mycobacterium tuberculosis variant bovis AF2122/97]	CAB5248185.1 (+2)	33 kDa	14	21	13	7	11	5	11	8
hypothetical protein Rv0738 [Mycobacterium tuberculosis H37Rv]	NP_215252.1 (+3)	19 kDa	14	9	7	2	7	5	14	6
D-alanyl-D-alanine carboxypeptidase DacB2 [Mycobacterium orygis]	QOY47962.1 (+3)	30 kDa	12	14	18	24	22	5	6	2
ATPase [Mycobacterium orygis]	QOY49572.1 (+1)	26 kDa	12	12	11	7	14	5	6	2
bacterioferritin BfrB [Mycobacterium tuberculosis H37Rv]	NP_218358.1 (+3)	20 kDa	10	12	13	15	19	5	3	6
PROBABLE CONSERVED LIPOPROTEIN LPQN [Mycobacterium tuberculosis variant bovis AF2122/97]	CAB5248307.1 (+3)	24 kDa	10	7	9	10	8	5	3	10
cutinase [Mycobacterium tuberculosis H37Rv]	NP_217968.2 (+3)	27 kDa	10	14	16	10	5	5	3	4
50S ribosomal protein L29 [Mycobacterium tuberculosis H37Rv]	NP_215223.1 (+3)	9 kDa	10	12	9	2	8	5	9	10
iron-regulated H-NS-like protein [Mycobacterium tuberculosis H37Rv]	NP_218114.1 (+3)	12 kDa	10	9	13	0	3	5	3	4
PROBABLE CONSERVED LIPOPROTEIN LPQI [Mycobacterium tuberculosis variant bovis AF2122/97]	CAB5247949.1 (+3)	40 kDa	8	12	11	20	23	5	6	8
Cluster of serine protease HtrA [Mycobacterium orygis] (QOY49948.1)	QOY49948.1 [3]	54 kDa	8	9	11	15	12	5	6	8
50S ribosomal protein L10 [Mycobacterium tuberculosis H37Rv]	NP_215165.1 (+3)	18 kDa	8	5	9	15	7	5	0	8
hypothetical protein Rv3678c [Mycobacterium tuberculosis H37Rv]	NP_218195.1 (+3)	15 kDa	8	7	9	7	15	5	9	8
Cluster of PPE family protein [Mycobacterium orygis] (QOY50714.1)	QOY50714.1 [4]	40 kDa	8	9	7	5	3	5	6	6
Cluster of serine/threonine-protein kinase PknD [Mycobacterium tuberculosis H37Rv] (NP_215446.1)	NP_215446.1 [5]	70 kDa	8	9	7	2	10	5	3	6
thioredoxin [Mycobacterium orygis]	QOY50184.1 (+3)	13 kDa	8	7	7	0	5	5	6	8
probable l,d-transpeptidase ldta [Mycobacterium tuberculosis variant bovis AF2122/97]	CAB5247822.1 (+3)	27 kDa	8	7	4	0	3	5	3	4
PE family protein [Mycobacterium orygis]	QOY47539.1 (+3)	11 kDa	6	5	7	22	27	5	14	10
Cluster of L-gulono-1,4-lactone dehydrogenase [Mycobacterium tuberculosis H37Rv] (NP_216287.1)	NP_216287.1 [4]	48 kDa	6	9	4	15	7	5	11	12
inorganic pyrophosphatase [Mycobacterium tuberculosis H37Rv]	NP_218145.1 (+3)	18 kDa	6	5	9	10	7	5	3	8
tryptophan--tRNA ligase [Mycobacterium tuberculosis H37Rv]	NP_217853.1 (+3)	36 kDa	6	2	0	10	16	5	3	4
hypothetical protein Rv2632c [Mycobacterium tuberculosis H37Rv]	NP_217148.1 (+3)	10 kDa	6	7	7	10	11	5	9	10
Cluster of cysteine synthase a cysk1 (o-acetylserine sulfhydrylase a) (o-acetylserine (thiol)-lyase a) (csase a) [Mycobacterium tuberculosis variant bovis AF2122/97] (SIU00974.1)	SIU00974.1 [4]	33 kDa	6	9	7	5	10	5	9	6
Cluster of lipid droplet-associated protein [Mycobacterium orygis] (QOY49847.1)	QOY49847.1 [4]	23 kDa	6	2	4	5	5	5	6	8
L-aparaginase [Mycobacterium tuberculosis H37Rv]	NP_216054.1 (+3)	33 kDa	6	2	4	5	3	5	11	8
mycolic acid methyltransferase MmaA1 [Mycobacterium tuberculosis H37Rv]	NP_215159.1 (+3)	33 kDa	6	7	4	5	4	5	9	4
hypothetical protein Rv3015c [Mycobacterium tuberculosis H37Rv]	NP_217531.1 (+3)	34 kDa	6	7	2	2	1	5	6	8
acetylornithine aminotransferase [Mycobacterium tuberculosis H37Rv]	NP_216171.1 (+3)	41 kDa	6	5	2	2	7	5	9	8
hypothetical protein Rv1810 [Mycobacterium tuberculosis H37Rv]	NP_216326.1 (+1)	12 kDa	6	5	4	2	5	5	3	4
hypothetical protein Rv3818 [Mycobacterium tuberculosis H37Rv]	NP_218335.1 (+3)	58 kDa	6	7	4	0	4	5	9	4
glutamate--tRNA ligase [Mycobacterium orygis]	QOY48036.1 (+3)	54 kDa	4	2	4	22	19	5	9	8
PROBABLE GRPE PROTEIN (HSP-70 COFACTOR) [Mycobacterium tuberculosis variant bovis AF2122/97]	CAB5248064.1 (+3)	25 kDa	4	5	4	12	45	5	6	14
hypothetical protein Rv2721c [Mycobacterium tuberculosis H37Rv]	NP_217237.1 (+3)	72 kDa	4	7	7	12	7	5	6	2
Cluster of TrkA family potassium uptake protein [Mycobacterium orygis] (QOY47765.1)	QOY47765.1 [4]	24 kDa	4	5	0	10	14	5	6	6
hypothetical protein Rv2731 [Mycobacterium tuberculosis H37Rv]	NP_217247.1 (+3)	50 kDa	4	5	9	5	12	5	6	6
Acyl-ACP thioesterase [Mycobacterium tuberculosis variant bovis AF2122/97]	CAB5248182.1 (+3)	30 kDa	4	0	4	5	8	5	6	2
Lactoylglutathione lyase and related lyases [Mycobacterium tuberculosis variant bovis AF2122/97]	CAB5248268.1 (+3)	14 kDa	4	5	2	5	5	5	6	4
glutamate decarboxylase GadB [Mycobacterium tuberculosis H37Rv]	NP_217949.1 (+3)	51 kDa	4	0	4	5	7	5	3	4
CCA tRNA nucleotidyltransferase [Mycobacterium orygis]	QOY48835.1 (+3)	53 kDa	4	5	4	2	4	5	6	4
ESX-1 secretion-associated protein EspL [Mycobacterium tuberculosis H37Rv]	NP_218397.1 (+3)	12 kDa	4	7	7	2	1	5	6	6
succinyl-diaminopimelate desuccinylase [Mycobacterium orygis]	QOY49930.1 (+3)	37 kDa	4	2	2	2	7	5	3	2
unknown protein [Mycobacterium tuberculosis variant bovis AF2122/97]	CAB5248046.1 (+3)	13 kDa	4	0	0	2	4	5	6	6
FAD-binding oxidoreductase [Mycobacterium orygis]	QOY50741.1 (+2)	56 kDa	4	0	0	2	8	5	3	2
hypothetical protein Rv3237c [Mycobacterium tuberculosis H37Rv]	NP_217754.1 (+3)	17 kDa	4	2	2	2	3	5	6	4
NADH-quinone oxidoreductase subunit F [Mycobacterium tuberculosis H37Rv]	NP_217666.1 (+3)	48 kDa	4	0	0	2	5	5	0	2
PROBABLE ALDEHYDE DEHYDROGENASE [Mycobacterium tuberculosis variant bovis AF2122/97]	CAB5248174.1 (+3)	55 kDa	4	0	0	0	11	5	3	6
link to FMN-binding protein [Mycobacterium tuberculosis variant bovis AF2122/97]	CAB5248157.1 (+3)	19 kDa	4	7	2	0	5	5	6	6
Cluster of NADPH-ferredoxin reductase FprA [Mycobacterium tuberculosis H37Rv] (NP_217622.1)	NP_217622.1 [4]	49 kDa	4	5	7	0	3	5	6	10
diacyglycerol O-acyltransferase [Mycobacterium tuberculosis H37Rv]	NP_218251.1 (+3)	49 kDa	4	2	2	0	0	5	3	4
phosphomannomutase PmmA [Mycobacterium tuberculosis H37Rv]	NP_217774.1 (+3)	49 kDa	4	5	2	0	0	5	9	18
(3R)-hydroxyacyl-ACP dehydratase subunit HadC [Mycobacterium tuberculosis H37Rv]	NP_215151.1 (+3)	19 kDa	4	2	2	0	4	5	6	6
ornithine carbamoyltransferase [Mycobacterium tuberculosis H37Rv]	NP_216172.1 (+3)	33 kDa	4	5	2	0	5	5	3	4
peptidoglycan editing factor PgeF [Mycobacterium orygis]	QOY47290.1 (+1)	24 kDa	4	0	2	0	3	5	6	6
DNA polymerase I [Mycobacterium tuberculosis H37Rv]	NP_216145.1 (+3)	98 kDa	2	0	0	22	18	5	14	12
hypothetical protein Rv1906c [Mycobacterium tuberculosis H37Rv]	NP_216422.1 (+3)	16 kDa	2	7	4	17	12	5	0	0
transcriptional regulator [Mycobacterium tuberculosis H37Rv]	NP_217119.1 (+3)	27 kDa	2	12	9	12	10	5	6	10
citrate (pro-3S)-lyase subunit beta [Mycobacterium tuberculosis H37Rv]	NP_217014.1 (+3)	29 kDa	2	0	0	12	16	5	11	10
Cluster of alanine--tRNA ligase [Mycobacterium orygis] (QOY47651.1)	QOY47651.1 [4]	97 kDa	2	5	7	10	11	5	6	6
transglycosylase/D,D-transpeptidase PonA2 [Mycobacterium orygis]	QOY48635.1 (+3)	85 kDa	2	5	4	10	12	5	0	4
Cluster of glutamyl-tRNA(GLN) amidotransferase subunit A [Mycobacterium tuberculosis H37Rv] (NP_217527.2)	NP_217527.2 [2]	51 kDa	2	0	2	7	8	5	3	6
Cluster of SRPBCC family protein [Mycobacterium orygis] (QOY48939.1)	QOY48939.1 [4]	17 kDa	2	0	0	7	10	5	6	6
50S ribosomal protein L25 [Mycobacterium tuberculosis H37Rv]	NP_215531.1 (+3)	22 kDa	2	0	0	7	10	5	6	4
Cluster of aminomethyl-transferring glycine dehydrogenase [Mycobacterium orygis] (QOY50486.1)	QOY50486.1 [3]	99 kDa	2	2	2	5	8	5	6	10
phosphoribosylformylglycinamidine synthase [Mycobacterium tuberculosis H37Rv]	NP_215303.1 (+3)	24 kDa	2	0	4	5	0	5	3	4
PROBABLE TRANSCRIPTIONAL REGULATORY PROTEIN (POSSIBLY ARSR-FAMILY) [Mycobacterium tuberculosis variant bovis AF2122/97]	CAB5248300.1 (+3)	46 kDa	2	0	2	5	7	5	3	4
hypothetical protein Rv0811c [Mycobacterium tuberculosis H37Rv]	NP_215326.1 (+3)	39 kDa	2	2	4	5	5	5	9	6
anthranilate synthase component I [Mycobacterium tuberculosis H37Rv]	NP_216125.1 (+3)	56 kDa	2	0	2	2	5	5	0	2
hypothetical protein Rv2411c [Mycobacterium tuberculosis H37Rv]	NP_216927.1 (+3)	61 kDa	2	2	2	2	1	5	3	2
50S ribosomal protein L22 [Mycobacterium tuberculosis H37Rv]	NP_215220.1 (+3)	20 kDa	2	0	0	2	3	5	6	4
hypothetical protein Rv0679c [Mycobacterium tuberculosis H37Rv]	NP_215193.1 (+3)	17 kDa	2	0	2	2	1	5	0	2
TetR/AcrR family transcriptional regulator [Mycobacterium orygis]	QOY50590.1 (+1)	23 kDa	2	2	2	2	4	5	11	4
long-chain-fatty-acid--CoA ligase FadD23 [Mycobacterium tuberculosis H37Rv]	NP_218343.1 (+3)	63 kDa	2	5	4	2	5	5	6	8
phosphoribosyl isomerase A [Mycobacterium tuberculosis H37Rv]	NP_216119.1 (+3)	26 kDa	2	2	7	2	5	5	6	12
hypothetical protein Rv2901c [Mycobacterium tuberculosis H37Rv]	NP_217417.1 (+3)	12 kDa	2	2	0	0	4	5	3	4
hypothetical protein Rv0786c [Mycobacterium tuberculosis H37Rv]	NP_215300.2 (+2)	23 kDa	2	0	2	0	1	5	3	4
fatty-acid--CoA ligase FadD14 [Mycobacterium tuberculosis H37Rv]	NP_215574.1 (+3)	60 kDa	2	5	0	0	4	5	3	4
Cluster of transcriptional regulator [Mycobacterium tuberculosis H37Rv] (NP_215333.1)	NP_215333.1 [4]	28 kDa	2	5	2	0	0	5	3	0
SDR family NAD(P)-dependent oxidoreductase [Mycobacterium orygis]	QOY48678.1 (+1)	34 kDa	2	5	2	0	0	5	3	4
PROBABLE PERIPLASMIC IRON-TRANSPORT LIPOPROTEIN [Mycobacterium tuberculosis variant bovis AF2122/97]	CAB5247977.1 (+3)	35 kDa	2	2	2	0	0	5	0	2
unknown protein [Mycobacterium tuberculosis variant bovis AF2122/97]	CAB5248021.1 (+3)	17 kDa	2	2	2	0	3	5	6	4
possible oxidoreductase [Mycobacterium tuberculosis variant bovis AF2122/97]	CAB5247872.1 (+3)	47 kDa	0	0	0	12	5	5	3	0
sulfite reductase SirA [Mycobacterium orygis]	QOY47505.1 (+1)	62 kDa	0	0	0	7	14	5	0	6
lipoprotein LpqB [Mycobacterium tuberculosis H37Rv]	NP_217761.1 (+3)	61 kDa	0	2	2	7	19	5	6	4
coenzyme F420-dependent oxidoreductase [Mycobacterium tuberculosis H37Rv]	NP_218037.1 (+3)	38 kDa	0	0	0	7	7	5	3	4
TldD/PmbA family protein [Mycobacterium orygis]	QOY47443.1	49 kDa	0	0	0	5	10	5	3	4
PROBABLE LIPOPROTEIN AMINOPEPTIDASE LPQL [Mycobacterium tuberculosis variant bovis AF2122/97]	CAB5248132.1 (+3)	52 kDa	0	2	0	5	11	5	3	4
TetR family transcriptional regulator [Mycobacterium tuberculosis H37Rv]	NP_217812.1 (+3)	25 kDa	0	0	2	5	10	5	9	4
50S ribosomal protein L2 [Mycobacterium tuberculosis H37Rv]	NP_215218.1 (+3)	31 kDa	0	0	2	2	5	5	9	10
ATP synthase subunit gamma [Mycobacterium tuberculosis H37Rv]	NP_215825.1 (+3)	34 kDa	0	2	4	2	11	5	6	0
class I SAM-dependent methyltransferase [Mycobacterium orygis]	QOY48673.1 (+1)	48 kDa	0	0	0	2	3	5	0	8
PROBABLE ADENYLOSUCCINATE SYNTHETASE PURA (IMP--ASPARTATE LIGASE) (ADSS) (AMPSASE) [Mycobacterium tuberculosis variant bovis AF2122/97]	CAB5248069.1 (+3)	47 kDa	0	0	0	2	5	5	0	6
4-aminobutyrate aminotransferase [Mycobacterium tuberculosis H37Rv]	NP_217105.1 (+3)	47 kDa	0	0	2	2	11	5	3	4
haloalkane dehalogenase [Mycobacterium tuberculosis H37Rv]	NP_216812.1 (+3)	33 kDa	0	2	0	2	5	5	9	4
30S ribosomal protein S18 [Mycobacterium orygis]	QOY48906.1 (+3)	10 kDa	0	0	2	2	1	5	3	4
hypothetical protein Rv2908c [Mycobacterium tuberculosis H37Rv]	NP_217424.1 (+3)	9 kDa	0	5	4	2	1	5	9	8
phosphoribosylformylglycinamidine cyclo-ligase PurM [Mycobacterium tuberculosis H37Rv]	NP_215324.1 (+3)	38 kDa	0	0	2	2	0	5	3	4
oxidoreductase [Mycobacterium tuberculosis H37Rv]	NP_215776.1 (+2)	41 kDa	0	0	0	2	4	5	3	8
hypothetical protein Rv1488 [Mycobacterium tuberculosis H37Rv]	NP_216004.1 (+3)	41 kDa	0	0	0	2	4	5	3	10
hypothetical protein RJtmp_002118 [Mycobacterium orygis]	QOY47204.1	22 kDa	0	0	2	2	1	5	3	0
fatty-acid--CoA ligase FadD25 [Mycobacterium tuberculosis H37Rv]	NP_216037.1 (+3)	63 kDa	0	2	4	2	0	5	6	6
AMP-binding protein [Mycobacterium orygis]	QOY50241.1	63 kDa	0	2	4	2	0	5	6	6
Exoenzymes regulatory protein AepA precursor [Mycobacterium tuberculosis variant bovis AF2122/97]	CAB5248275.1 (+3)	57 kDa	0	5	2	0	1	5	0	2
Cluster of 2-oxo acid dehydrogenase subunit E2 [Mycobacterium orygis] (QOY47591.1)	QOY47591.1 [2]	41 kDa	0	0	0	0	4	5	0	2
Cluster of NADP-dependent phosphogluconate dehydrogenase [Mycobacterium orygis] (QOY50498.1)	QOY50498.1 [4]	51 kDa	0	0	0	0	0	5	0	4
ABC transporter ATP-binding protein/permease [Mycobacterium tuberculosis H37Rv]	NP_216263.1 (+3)	92 kDa	0	0	0	0	1	5	3	6
acetyltransferase [Mycobacterium orygis]	QOY50218.1	24 kDa	0	0	0	0	0	5	6	2
SAM-dependent O-methyltransferase [Mycobacterium orygis]	QOY49945.1 (+1)	23 kDa	0	0	2	0	0	5	0	4
acetolactate synthase small subunit [Mycobacterium tuberculosis H37Rv]	NP_217518.1 (+3)	18 kDa	0	2	0	0	0	5	6	2
acyl-CoA thioesterase II [Mycobacterium orygis]	QOY50700.1 (+2)	33 kDa	0	0	0	0	0	5	0	2
oxidoreductase [Mycobacterium tuberculosis H37Rv]	NP_217297.1 (+3)	35 kDa	0	0	0	0	3	5	6	2
probable membrane-anchored mycosin mycp3 (serine protease) (subtilisin-like protease) (subtilase-like) (mycosin-3) [Mycobacterium tuberculosis variant bovis AF2122/97]	CAB5248005.1 (+3)	46 kDa	0	0	0	0	0	5	0	2
5-(carboxyamino)imidazole ribonucleotide mutase [Mycobacterium orygis]	QOY48283.1 (+2)	18 kDa	0	0	2	0	0	5	0	2
3-dehydroquinate synthase [Mycobacterium tuberculosis H37Rv]	NP_217054.1 (+3)	38 kDa	0	0	2	0	3	5	9	6
hypothetical protein Rv3856c [Mycobacterium tuberculosis H37Rv]	NP_218373.1 (+3)	37 kDa	0	0	0	0	1	5	3	4
alpha/beta hydrolase [Mycobacterium orygis]	QOY48455.1 (+1)	32 kDa	0	0	0	0	0	5	0	2
TWO COMPONENT SENSORY TRANSDUCTION PROTEIN REGX3 (TRANSCRIPTIONAL REGULATORY PROTEIN) (PROBABLY LUXR-FAMILY) [Mycobacterium tuberculosis variant bovis AF2122/97]	CAB5248208.1 (+3)	25 kDa	17	14	16	0	0	3	9	10
membrane protein [Mycobacterium tuberculosis H37Rv]	NP_218104.1 (+3)	27 kDa	14	12	9	24	16	3	0	4
hypothetical protein Rv1815 [Mycobacterium tuberculosis H37Rv]	NP_216331.1 (+3)	23 kDa	14	14	11	17	8	3	3	2
lipoprotein LppC [Mycobacterium tuberculosis H37Rv]	NP_216427.1 (+3)	20 kDa	12	12	9	49	19	3	0	6
PROBABLE GLUTAMATE-1-SEMIALDEHYDE 2,1-AMINOMUTASE HEML (GSA) (GLUTAMATE-1-SEMIALDEHYDE AMINOTRANSFERASE) (GSA-AT) [Mycobacterium tuberculosis variant bovis AF2122/97]	CAB5248244.1 (+3)	48 kDa	12	7	9	15	15	3	9	10
POSSIBLE EXPORTED PROTEIN [Mycobacterium tuberculosis variant bovis AF2122/97]	CAB5248238.1 (+3)	25 kDa	10	7	7	15	11	3	6	4
ribose-phosphate pyrophosphokinase [Mycobacterium tuberculosis H37Rv]	NP_215533.1 (+3)	35 kDa	10	5	11	7	5	3	6	6
hypothetical protein Rv3075c [Mycobacterium tuberculosis H37Rv]	NP_217591.1 (+3)	33 kDa	10	7	2	7	7	3	11	12
HYPOTHETICAL PROTEIN BQ2027_MB0081C [Mycobacterium tuberculosis variant bovis AF2122/97]	CAB5247783.1 (+3)	22 kDa	10	5	9	0	4	3	11	6
beta-lactamase [Mycobacterium tuberculosis H37Rv]	NP_216584.1 (+3)	33 kDa	8	12	11	27	42	3	6	8
POSSIBLE THIOREDOXIN PROTEIN (THIOL-DISULFIDE INTERCHANGE PROTEIN) [Mycobacterium tuberculosis variant bovis AF2122/97]	CAB5248246.1 (+1)	23 kDa	8	12	18	12	8	3	0	0
recombinase A [Mycobacterium tuberculosis H37Rv]	NP_217253.1 (+3)	85 kDa	8	7	9	0	0	3	0	6
Cluster of DNA gyrase subunit A [Mycobacterium tuberculosis H37Rv] (NP_214520.1)	NP_214520.1 [2]	92 kDa	6	5	7	12	29	3	9	24
hypothetical protein Rv2629 [Mycobacterium tuberculosis H37Rv]	NP_217145.1 (+3)	41 kDa	6	0	0	12	14	3	3	10
hypothetical protein Rv2240c [Mycobacterium tuberculosis H37Rv]	NP_216756.2 (+3)	20 kDa	6	12	9	10	8	3	3	4
hypothetical protein Rv3354 [Mycobacterium tuberculosis H37Rv]	NP_217871.1 (+2)	13 kDa	6	5	2	10	15	3	3	0
ATP synthase subunit epsilon [Mycobacterium tuberculosis H37Rv]	NP_215827.1 (+3)	13 kDa	6	5	2	7	1	3	3	2
Cluster of N-acetyl-gamma-glutamyl-phoshate reductase [Mycobacterium tuberculosis H37Rv] (NP_216168.1)	NP_216168.1 [4]	36 kDa	6	2	2	5	7	3	0	4
enoyl-ACP reductase FabI [Mycobacterium orygis]	QOY50198.1	29 kDa	6	2	2	5	3	3	0	2
(3R)-hydroxyacyl-ACP dehydratase subunit HadA [Mycobacterium tuberculosis H37Rv]	NP_215149.1 (+3)	17 kDa	6	2	7	5	10	3	3	8
hypothetical protein Rv0760c [Mycobacterium tuberculosis H37Rv]	NP_215274.1 (+3)	15 kDa	6	5	4	2	7	3	3	0
non-canonical purine NTP pyrophosphatase [Mycobacterium tuberculosis H37Rv]	NP_215857.1 (+3)	21 kDa	6	5	7	2	4	3	6	6
Cluster of 3-oxoacyl-ACP reductase FabG [Mycobacterium tuberculosis H37Rv] (NP_215999.1)	NP_215999.1 [4]	26 kDa	6	2	2	2	1	3	3	6
cold shock-like protein CspB [Mycobacterium tuberculosis H37Rv]	NP_215386.1 (+3)	15 kDa	6	5	7	0	3	3	6	4
cutinase [Mycobacterium tuberculosis H37Rv]	NP_217969.1 (+3)	23 kDa	6	7	7	0	1	3	0	2
Cluster of 3-deoxy-7-phosphoheptulonate synthase class II [Mycobacterium orygis] (QOY47316.1)	QOY47316.1 [4]	51 kDa	6	0	2	0	0	3	0	6
30S ribosomal protein S15 [Mycobacterium tuberculosis H37Rv]	NP_217301.1 (+3)	10 kDa	6	2	4	0	0	3	6	6
PE family protein [Mycobacterium orygis]	QOY50108.1 (+3)	10 kDa	4	12	11	24	16	3	6	8
translation initiation factor IF-2 [Mycobacterium tuberculosis H37Rv]	NP_217355.1 (+3)	94 kDa	4	5	2	17	10	3	6	12
Cluster of CYTH and CHAD domain-containing protein [Mycobacterium orygis] (QOY47359.1)	QOY47359.1 [2]	56 kDa	4	5	4	10	7	3	3	8
Cluster of lipoprotein LppZ [Mycobacterium tuberculosis H37Rv] (NP_217522.1)	NP_217522.1 [4]	39 kDa	4	5	4	10	16	3	0	6
M20/M25/M40 family metallo-hydrolase [Mycobacterium orygis]	QOY47282.1 (+3)	48 kDa	4	2	0	10	15	3	3	0
serine protease [Mycobacterium tuberculosis H37Rv]	NP_218188.1 (+3)	41 kDa	4	7	4	7	8	3	3	6
Cluster of phosphotriesterase [Mycobacterium tuberculosis H37Rv] (NP_214744.1)	NP_214744.1 [4]	36 kDa	4	2	0	7	10	3	3	4
type II toxin-antitoxin system VapB family antitoxin [Mycobacterium orygis]	QOY49429.1 (+3)	8 kDa	4	2	4	7	7	3	11	4
hydrolase [Mycobacterium tuberculosis H37Rv]	NP_217281.1 (+3)	26 kDa	4	0	2	7	8	3	6	4
low molecular weight T-cell antigen [Mycobacterium tuberculosis H37Rv]	NP_215690.1 (+3)	11 kDa	4	7	7	7	7	3	3	2
GMP synthase [Mycobacterium tuberculosis H37Rv]	NP_217913.1 (+3)	56 kDa	4	2	2	5	11	3	0	4
diaminopimelate epimerase [Mycobacterium tuberculosis H37Rv]	NP_217242.1 (+3)	30 kDa	4	2	0	5	4	3	6	4
hypothetical protein Rv1546 [Mycobacterium tuberculosis H37Rv]	NP_216062.1 (+3)	15 kDa	4	0	2	2	5	3	0	2
hypothetical protein Rv2716 [Mycobacterium tuberculosis H37Rv]	NP_217232.1 (+3)	25 kDa	4	2	0	2	4	3	0	0
pyridoxine biosynthesis protein [Mycobacterium tuberculosis H37Rv]	NP_217122.1 (+3)	31 kDa	4	2	2	2	7	3	3	8
hypothetical protein Rv3705c [Mycobacterium tuberculosis H37Rv]	NP_218222.1 (+3)	22 kDa	4	2	2	2	5	3	3	2
ppe family protein ppe4 [Mycobacterium tuberculosis variant bovis AF2122/97]	CAB5248000.1 (+3)	52 kDa	4	2	4	2	3	3	3	2
1D-myo-inositol 2-acetamido-2-deoxy-alpha-D-glucopyranoside deacetylase [Mycobacterium tuberculosis H37Rv]	NP_215686.1 (+3)	32 kDa	4	5	4	2	5	3	3	2
Cluster of FOG- CBS domain [Mycobacterium tuberculosis variant bovis AF2122/97] (SIU01320.1)	SIU01320.1 [2]	18 kDa	4	2	4	2	4	3	3	4
ferredoxin FdxC [Mycobacterium tuberculosis H37Rv]	NP_215693.1 (+3)	12 kDa	4	0	4	2	3	3	0	4
transcription antitermination factor NusB [Mycobacterium orygis]	QOY47629.1 (+2)	17 kDa	4	5	2	2	4	3	0	0
hypothetical protein Rv1061 [Mycobacterium tuberculosis H37Rv]	NP_215577.1 (+3)	32 kDa	4	2	4	2	3	3	3	6
NADH-quinone oxidoreductase subunit C [Mycobacterium tuberculosis H37Rv]	NP_217663.1 (+3)	27 kDa	4	2	9	2	5	3	3	6
TREHALOSE SYNTHASE TRES [Mycobacterium tuberculosis variant bovis AF2122/97]	CAB5247833.1 (+3)	69 kDa	4	2	4	2	5	3	3	12
POSSIBLE PEROXIDASE BPOC (NON-HAEM PEROXIDASE) [Mycobacterium tuberculosis variant bovis AF2122/97]	CAB5248277.1 (+3)	28 kDa	4	2	4	0	5	3	6	0
Cluster of PPOX class F420-dependent oxidoreductase [Mycobacterium orygis] (QOY49886.1)	QOY49886.1 [4]	16 kDa	4	2	2	0	1	3	6	4
ATPases involved in chromosome partitioning [Mycobacterium tuberculosis variant bovis AF2122/97]	CAB5248250.1 (+2)	43 kDa	4	2	0	0	0	3	0	4
pup deamidase/depupylase [Mycobacterium tuberculosis H37Rv]	NP_216628.1 (+3)	60 kDa	4	5	4	0	1	3	3	6
50S ribosomal protein L13 [Mycobacterium tuberculosis H37Rv]	NP_217960.1 (+3)	16 kDa	4	7	2	0	0	3	6	8
crotonase/enoyl-CoA hydratase family protein [Mycobacterium orygis]	QOY49469.1 (+3)	27 kDa	4	2	2	0	3	3	6	6
phosphoserine/threonine phosphatase PstP [Mycobacterium tuberculosis H37Rv]	NP_214532.1 (+3)	54 kDa	4	5	4	0	1	3	3	2
chorismate pyruvate-lyase [Mycobacterium tuberculosis H37Rv]	NP_217465.1 (+3)	23 kDa	4	5	0	0	1	3	6	4
hypothetical protein Rv1732c [Mycobacterium tuberculosis H37Rv]	NP_216248.1 (+3)	19 kDa	4	2	0	0	3	3	3	2
peroxiredoxin [Mycobacterium tuberculosis H37Rv]	NP_216754.1 (+3)	17 kDa	4	0	0	0	1	3	3	4
conserved protein [Mycobacterium tuberculosis variant bovis AF2122/97]	CAB5247962.1 (+3)	11 kDa	2	2	4	32	20	3	0	6
Cluster of DNA gyrase subunit B [Mycobacterium tuberculosis H37Rv] (NP_214519.2)	NP_214519.2 [3]	74 kDa	2	5	2	22	30	3	0	0
cystathionine gamma-synthase [Mycobacterium tuberculosis H37Rv]	NP_215595.1 (+3)	41 kDa	2	0	0	17	7	3	3	0
Cluster of PROBABLE PYRROLINE-5-CARBOXYLATE REDUCTASE PROC (P5CR) (P5C REDUCTASE) [Mycobacterium tuberculosis variant bovis AF2122/97] (CAB5248218.1)	CAB5248218.1 [2]	30 kDa	2	0	2	17	16	3	0	0
threonine synthase [Mycobacterium tuberculosis H37Rv]	NP_215811.1 (+3)	37 kDa	2	0	7	12	23	3	3	4
acyl-ACP desaturase DesA1 [Mycobacterium orygis]	QOY49603.1 (+3)	39 kDa	2	0	0	10	15	3	6	6
citrate synthase 2 [Mycobacterium tuberculosis H37Rv]	NP_215404.1 (+3)	40 kDa	2	2	2	10	10	3	9	4
deoxyuridine 5'-triphosphate nucleotidohydrolase [Mycobacterium tuberculosis H37Rv]	NP_217213.1 (+3)	16 kDa	2	0	0	10	4	3	3	2
20-beta-hydroxysteroid dehydrogenase [Mycobacterium tuberculosis H37Rv]	NP_216518.1 (+3)	27 kDa	2	2	2	7	3	3	3	2
3-phosphoshikimate 1-carboxyvinyltransferase [Mycobacterium tuberculosis H37Rv]	NP_217744.1 (+3)	46 kDa	2	2	7	7	14	3	6	6
1,4-dihydroxy-2-naphthoyl-CoA synthase [Mycobacterium orygis]	QOY49354.1 (+1)	33 kDa	2	0	7	5	15	3	3	6
PROBABLE RESTRICTION SYSTEM PROTEIN MRR [Mycobacterium tuberculosis variant bovis AF2122/97]	SIU01173.1	34 kDa	2	0	2	5	11	3	3	6
Cluster of acetyl-/propionyl-CoA carboxylase subunit beta [Mycobacterium tuberculosis H37Rv] (NP_216763.1)	NP_216763.1 [4]	50 kDa	2	2	4	5	5	3	3	10
Cluster of transferase [Mycobacterium tuberculosis H37Rv] (NP_215893.1)	NP_215893.1 [4]	23 kDa	2	7	7	5	8	3	3	8
alternative rna polymerase sigma factor sigk [Mycobacterium tuberculosis variant bovis AF2122/97]	CAB5248159.1 (+3)	21 kDa	2	2	2	5	5	3	0	0
Carboxylate-amine ligase [Mycobacterium tuberculosis variant bovis AF2122/97]	CAB5248147.1 (+3)	42 kDa	2	2	2	5	3	3	3	4
Cluster of maleylpyruvate isomerase family mycothiol-dependent enzyme [Mycobacterium orygis] (QOY49154.1)	QOY49154.1 [3]	28 kDa	2	0	0	5	1	3	3	2
branched-chain amino acid aminotransferase [Mycobacterium tuberculosis H37Rv]	NP_216726.1 (+3)	40 kDa	2	0	0	5	3	3	3	0
pyridoxine/pyridoxamine 5'-phosphate oxidase [Mycobacterium tuberculosis H37Rv]	NP_217123.1 (+3)	25 kDa	2	2	4	5	5	3	3	2
HIT family protein [Mycobacterium tuberculosis]	gnl|extdb|pgaptmp_000808	15 kDa	2	0	4	5	4	3	0	2
ESX-1 secretion-associated protein EspH [Mycobacterium tuberculosis H37Rv]	NP_218384.1 (+3)	20 kDa	2	0	2	5	5	3	3	4
phosphoribosylformylglycinamidine synthase subunit PurS [Mycobacterium orygis]	QOY49573.1 (+3)	9 kDa	2	2	2	5	3	3	0	2
riboflavin synthase [Mycobacterium tuberculosis H37Rv]	NP_215928.1 (+3)	21 kDa	2	7	4	2	3	3	9	4
conserved protein [Mycobacterium tuberculosis variant bovis AF2122/97]	CAB5248072.1 (+3)	15 kDa	2	2	2	2	5	3	6	8
PROBABLE O-SUCCINYLHOMOSERINE SULFHYDRYLASE METZ (OSH SULFHYDRYLASE) [Mycobacterium tuberculosis variant bovis AF2122/97]	CAB5248102.1 (+3)	43 kDa	2	0	2	2	7	3	3	6
membrane protein MmpS3 [Mycobacterium tuberculosis H37Rv]	NP_216714.1 (+3)	31 kDa	2	5	4	2	1	3	0	2
4-(cytidine 5'-diphospho)-2-C-methyl-D-erythritol kinase [Mycobacterium orygis]	QOY49768.1 (+1)	33 kDa	2	0	2	2	5	3	3	2
MarR family transcriptional regulator [Mycobacterium orygis]	QOY48893.1 (+1)	18 kDa	2	5	2	2	3	3	3	0
conserved protein [Mycobacterium tuberculosis variant bovis AF2122/97]	CAB5248304.1 (+3)	18 kDa	2	0	0	2	5	3	0	6
hypothetical protein Rv1893 [Mycobacterium tuberculosis H37Rv]	NP_216409.1 (+3)	7 kDa	2	2	2	2	3	3	3	4
Cluster of GCN5-like N-acetyltransferase [Mycobacterium tuberculosis H37Rv] (NP_214942.1)	NP_214942.1 [4]	33 kDa	2	0	4	2	5	3	6	2
phosphoribosylformylglycinamidine synthase 2 [Mycobacterium tuberculosis H37Rv]	NP_215318.1 (+3)	80 kDa	2	2	2	2	5	3	3	4
lipase/esterase LipN [Mycobacterium tuberculosis H37Rv]	NP_217486.1 (+3)	40 kDa	2	0	0	2	1	3	0	2
ubiquinol-cytochrome C reductase cytochrome subunit C [Mycobacterium tuberculosis H37Rv]	NP_216710.1 (+3)	29 kDa	2	2	2	2	1	3	3	2
TetR family transcriptional regulator [Mycobacterium tuberculosis H37Rv]	NP_217724.1 (+3)	25 kDa	2	0	0	2	1	3	3	0
single-stranded DNA-binding protein [Mycobacterium orygis]	QOY48848.1 (+1)	21 kDa	2	12	9	2	4	3	6	10
Cluster of PROBABLE ACYL-COA THIOESTERASE II TESB2 (TEII) [Mycobacterium tuberculosis variant bovis AF2122/97] (SIU01255.1)	SIU01255.1 [4]	32 kDa	2	2	0	2	5	3	0	0
aspartyl/glutamyl-tRNA(Asn/Gln) amidotransferase subunit B [Mycobacterium tuberculosis H37Rv]	NP_217525.1 (+3)	55 kDa	2	2	2	2	3	3	3	6
glutamine synthetase [Mycobacterium tuberculosis H37Rv]	NP_216738.1 (+3)	50 kDa	2	2	2	2	7	3	3	4
ribonuclease III [Mycobacterium tuberculosis H37Rv]	NP_217441.1 (+3)	25 kDa	2	0	0	2	3	3	0	2
ribonuclease PH [Mycobacterium tuberculosis H37Rv]	NP_215856.1 (+3)	27 kDa	2	0	0	2	8	3	3	0
glycine cleavage system protein H [Mycobacterium tuberculosis H37Rv]	NP_216342.1 (+3)	14 kDa	2	5	4	2	0	3	3	4
Cluster of HEAT SHOCK PROTEIN HSP (HEAT-STRESS-INDUCED RIBOSOME-BINDING PROTEIN A) [Mycobacterium tuberculosis variant bovis AF2122/97] (CAB5247963.1)	CAB5247963.1 [4]	18 kDa	2	2	2	2	3	3	0	2
hypothetical protein Rv2969c [Mycobacterium tuberculosis H37Rv]	NP_217485.1 (+3)	27 kDa	2	0	0	0	3	3	3	2
NADPH quinone oxidoreductase FadB [Mycobacterium tuberculosis H37Rv]	NP_217657.1 (+3)	34 kDa	2	5	4	0	0	3	0	2
PROBABLE PORPHOBILINOGEN DEAMINASE HEMC (PBG) (HYDROXYMETHYLBILANE SYNTHASE) (HMBS) (PRE-UROPORPHYRINOGEN SYNTHASE) [Mycobacterium tuberculosis variant bovis AF2122/97]	CAB5248230.1 (+3)	32 kDa	2	2	4	0	5	3	6	4
50S ribosomal protein L16 [Mycobacterium tuberculosis H37Rv]	NP_215222.1 (+3)	16 kDa	2	2	2	0	0	3	0	2
membrane protein [Mycobacterium tuberculosis H37Rv]	NP_216607.1 (+3)	26 kDa	2	0	2	0	0	3	3	0
30S ribosomal protein S12 [Mycobacterium tuberculosis H37Rv]	NP_215196.1 (+3)	14 kDa	2	2	0	0	1	3	0	2
hypothetical protein Rv3755c [Mycobacterium tuberculosis H37Rv]	NP_218272.1 (+3)	22 kDa	2	0	2	0	4	3	6	4
Cluster of PROBABLE PHOSPHOSERINE PHOSPHATASE SERB2 (PSP) (O-PHOSPHOSERINE PHOSPHOHYDROLASE) (PSPASE) [Mycobacterium tuberculosis variant bovis AF2122/97] (SIU01693.1)	SIU01693.1 [2]	43 kDa	2	0	4	0	1	3	3	4
Cluster of repressor LexA [Mycobacterium tuberculosis H37Rv] (NP_217236.2)	NP_217236.2 [4]	25 kDa	2	0	0	0	8	3	0	2
periplasmic superoxide dismutase [cu-zn] sodc [Mycobacterium tuberculosis variant bovis AF2122/97]	CAB5248146.1 (+3)	24 kDa	2	2	2	0	0	3	0	0
PROBABLE POLYPRENYL-DIPHOSPHATE SYNTHASE GRCC1 (POLYPRENYL PYROPHOSPHATE SYNTHETASE) [Mycobacterium tuberculosis variant bovis AF2122/97]	CAB5248285.1 (+3)	36 kDa	2	0	2	0	3	3	3	0
SDR family oxidoreductase [Mycobacterium orygis]	QOY47833.1 (+3)	27 kDa	2	2	0	0	0	3	3	2
hypothetical protein Rv3311 [Mycobacterium tuberculosis H37Rv]	NP_217828.1 (+3)	46 kDa	2	0	2	0	0	3	0	4
conserved protein [Mycobacterium tuberculosis variant bovis AF2122/97]	CAB5248180.1 (+3)	21 kDa	2	0	2	0	0	3	3	2
acyltransferase [Mycobacterium tuberculosis H37Rv]	NP_218333.1 (+3)	28 kDa	2	2	2	0	3	3	0	2
membrane protein [Mycobacterium tuberculosis H37Rv]	NP_218319.1 (+3)	35 kDa	2	2	2	0	3	3	0	2
ESX-1 secretion-associated protein EspG [Mycobacterium tuberculosis H37Rv]	NP_218383.1 (+3)	30 kDa	2	2	4	0	0	3	0	2
50S ribosomal protein L14 [Mycobacterium tuberculosis H37Rv]	NP_215228.1 (+3)	13 kDa	2	0	4	0	0	3	0	2
proteasome accessory factor C [Mycobacterium tuberculosis H37Rv]	NP_216611.1 (+3)	34 kDa	2	0	0	0	3	3	3	2
transcriptional regulator NrdR [Mycobacterium tuberculosis H37Rv]	NP_217234.1 (+3)	17 kDa	2	0	0	0	0	3	0	2
mycothiol acetyltransferase [Mycobacterium tuberculosis H37Rv]	NP_215334.1 (+3)	34 kDa	2	0	0	0	1	3	0	2
steroid C26-monooxygenase Cyp125 [Mycobacterium orygis]	QOY48517.1 (+1)	47 kDa	2	2	2	0	0	3	0	2
oxidoreductase [Mycobacterium tuberculosis H37Rv]	NP_215455.1 (+3)	32 kDa	2	0	0	0	3	3	0	0
bifunctional pyrimidine operon regulatory protein/uracil phosphoribosyltransferase [Mycobacterium tuberculosis H37Rv]	NP_215895.1 (+3)	21 kDa	2	0	0	0	3	3	3	2
DNA-binding protein [Mycobacterium tuberculosis H37Rv]	NP_216691.1 (+2)	16 kDa	2	0	4	0	1	3	3	6
peptide methionine sulfoxide reductase MsrB [Mycobacterium tuberculosis H37Rv]	NP_217190.1 (+3)	15 kDa	2	2	2	0	1	3	0	4
tRNA (guanine-N1)-methyltransferase [Mycobacterium tuberculosis H37Rv]	NP_217422.1 (+2)	25 kDa	2	0	2	0	1	3	3	0
possible oxidoreductase [Mycobacterium tuberculosis variant bovis AF2122/97]	CAB5247957.1 (+3)	17 kDa	2	0	2	0	0	3	0	2
tRNA adenosine deaminase-associated protein [Mycobacterium orygis]	QOY48698.1 (+2)	19 kDa	2	2	2	0	0	3	3	2
dihydroneopterin aldolase [Mycobacterium orygis]	QOY48576.1 (+3)	15 kDa	2	0	2	0	1	3	6	0
hypothetical protein Rv1062 [Mycobacterium tuberculosis H37Rv]	NP_215578.1 (+3)	29 kDa	2	2	2	0	3	3	3	4
Glyoxalase family protein [Mycobacterium tuberculosis variant bovis AF2122/97]	CAB5247986.1 (+3)	21 kDa	2	0	0	0	1	3	0	0
Propionyl-CoA thioesterase activity [Mycobacterium tuberculosis variant bovis AF2122/97]	CAB5247874.1 (+3)	17 kDa	2	0	0	0	0	3	3	0
anti-sigma-D factor RsdA [Mycobacterium tuberculosis H37Rv]	NP_217930.1 (+3)	31 kDa	0	0	0	10	3	3	3	2
GDP-D-mannose dehydratase GmdA [Mycobacterium tuberculosis H37Rv]	NP_216027.1 (+2)	38 kDa	0	0	0	7	14	3	3	0
acyl-CoA dehydrogenase FadE8 [Mycobacterium tuberculosis H37Rv]	NP_215186.1 (+3)	59 kDa	0	0	0	7	3	3	0	2
acetyl-CoA acetyltransferase FadA [Mycobacterium tuberculosis H37Rv]	NP_218073.1 (+3)	41 kDa	0	0	0	7	8	3	0	4
ubiquitin-like protein Pup [Mycobacterium tuberculosis H37Rv]	NP_216627.1 (+3)	7 kDa	0	0	0	7	4	3	6	4
hypothetical protein Rv3127 [Mycobacterium tuberculosis H37Rv]	NP_217643.1 (+2)	39 kDa	0	0	0	5	10	3	0	0
POSSIBLE SECRETED PROTEIN [Mycobacterium tuberculosis variant bovis AF2122/97]	CAB5248105.1 (+3)	25 kDa	0	2	2	5	5	3	3	2
hypothetical protein Rv3169 [Mycobacterium tuberculosis H37Rv]	NP_217685.1 (+3)	42 kDa	0	0	0	5	7	3	3	6
acid phosphatase [Mycobacterium orygis]	QOY48230.1 (+3)	22 kDa	0	2	2	5	4	3	0	2
tRNA (adenine(58)-N(1))-methyltransferase [Mycobacterium tuberculosis H37Rv]	NP_216634.1 (+3)	30 kDa	0	0	2	2	10	3	0	0
ABC transporter ATP-binding protein [Mycobacterium orygis]	QOY49449.1 (+1)	37 kDa	0	0	2	2	3	3	0	2
branched-chain keto acid dehydrogenase E1 component subunit alpha [Mycobacterium tuberculosis H37Rv]	NP_217013.1 (+3)	41 kDa	0	0	0	2	4	3	0	6
PROBABLE SULFATASE [Mycobacterium tuberculosis variant bovis AF2122/97]	CAB5248010.1 (+3)	52 kDa	0	5	2	2	5	3	3	2
Cluster of alpha-keto-acid decarboxylase [Mycobacterium tuberculosis H37Rv] (NP_215368.1)	NP_215368.1 [4]	60 kDa	0	0	0	2	4	3	3	6
Xaa-Pro dipeptidase (EC [Mycobacterium tuberculosis variant bovis AF2122/97]	CAB5247778.1 (+3)	43 kDa	0	0	0	2	0	3	0	2
GTP cyclohydrolase [Mycobacterium tuberculosis H37Rv]	NP_216746.1 (+3)	40 kDa	0	0	0	2	0	3	3	2
phosphoglucomutase PgmA [Mycobacterium tuberculosis H37Rv]	NP_217584.1 (+3)	58 kDa	0	0	0	2	4	3	0	4
alpha-1,4-glucan:maltose-1-phosphate maltosyltransferase [Mycobacterium tuberculosis H37Rv]	NP_215843.2 (+3)	79 kDa	0	0	0	2	16	3	0	4
hypothetical protein Rv2035 [Mycobacterium tuberculosis H37Rv]	NP_216551.1 (+3)	19 kDa	0	5	2	2	3	3	0	4
YggS family pyridoxal phosphate-dependent enzyme [Mycobacterium orygis]	QOY50732.1 (+3)	28 kDa	0	0	0	2	3	3	3	6
DUF3090 domain-containing protein [Mycobacterium orygis]	QOY47276.1	21 kDa	0	2	2	2	4	3	3	2
PROBABLE PEPTIDASE [Mycobacterium tuberculosis variant bovis AF2122/97]	CAB5248173.1 (+3)	75 kDa	0	0	0	2	4	3	3	4
PROBABLE TRANSPOSASE [Mycobacterium tuberculosis variant bovis AF2122/97]	SIU01458.1	12 kDa	0	0	0	2	3	3	0	0
HYPOTHETICAL METHLYTRANSFERASE (METHYLASE) [Mycobacterium tuberculosis variant bovis AF2122/97]	CAB5247920.1 (+3)	29 kDa	0	0	2	2	5	3	0	2
DNA-directed RNA polymerase subunit omega [Mycobacterium tuberculosis H37Rv]	NP_215906.1 (+3)	12 kDa	0	0	2	2	5	3	0	2
50S ribosomal protein L19 [Mycobacterium tuberculosis H37Rv]	NP_217420.1 (+3)	13 kDa	0	0	4	2	1	3	0	4
N5-carboxyaminoimidazole ribonucleotide synthase [Mycobacterium tuberculosis H37Rv]	NP_217793.1 (+3)	46 kDa	0	0	0	0	11	3	0	2
long chain-fatty-acid--CoA ligase FadD13 [Mycobacterium tuberculosis H37Rv]	NP_217605.1 (+3)	54 kDa	0	0	2	0	11	3	3	0
PROBABLE DIHYDROOROTASE PYRC (DHOase) [Mycobacterium tuberculosis variant bovis AF2122/97]	SIU00019.1	45 kDa	0	0	2	0	7	3	0	2
histidinol dehydrogenase [Mycobacterium tuberculosis H37Rv]	NP_216115.1 (+3)	45 kDa	0	0	0	0	3	3	0	0
aldehyde dehydrogenase family protein [Mycobacterium orygis]	QOY50592.1 (+1)	53 kDa	0	0	2	0	0	3	0	0
anti-anti-sigma factor RsfB [Mycobacterium tuberculosis H37Rv]	NP_218204.1 (+3)	13 kDa	0	0	0	0	0	3	6	2
oxidoreductase [Mycobacterium tuberculosis H37Rv]	NP_218294.1 (+3)	34 kDa	0	0	0	0	3	3	0	0
POSSIBLE CONSERVED MEMBRANE PROTEIN [Mycobacterium tuberculosis variant bovis AF2122/97]	CAB5248260.1 (+3)	55 kDa	0	0	0	0	1	3	0	2
NAD(P)H-quinone dehydrogenase [Mycobacterium orygis]	QOY48310.1 (+1)	49 kDa	0	0	2	0	3	3	0	2
Cluster of type VII secretion system ESX-1 associated protein EspE [Mycobacterium orygis] (QOY48799.1)	QOY48799.1 [4]	44 kDa	0	2	2	0	0	3	0	8
hypothetical protein Rv2410c [Mycobacterium tuberculosis H37Rv]	NP_216926.1 (+3)	36 kDa	0	0	2	0	1	3	0	2
hypothetical protein Rv2260 [Mycobacterium tuberculosis H37Rv]	NP_216776.1 (+3)	22 kDa	0	2	2	0	0	3	3	2
Cluster of biotin--[acetyl-CoA-carboxylase] ligase [Mycobacterium orygis] (QOY48287.1)	QOY48287.1 [4]	28 kDa	0	0	0	0	4	3	0	2
Cluster of bifunctional diaminohydroxyphosphoribosylaminopyrimidine deaminase/5-amino-6-(5-phosphoribosylamino)uracil reductase RibD [Mycobacterium orygis] (QOY50128.1)	QOY50128.1 [4]	35 kDa	0	0	0	0	0	3	0	0
Cluster of molecular chaperone DnaJ [Mycobacterium orygis] (QOY47487.1)	QOY47487.1 [4]	40 kDa	0	2	4	0	1	3	0	0
lysine--tRNA ligase [Mycobacterium tuberculosis H37Rv]	NP_218115.1 (+3)	56 kDa	0	0	0	0	0	3	0	0
Cluster of acyl-CoA synthetase [Mycobacterium orygis] (QOY48490.1)	QOY48490.1 [6]	60 kDa	0	0	0	0	1	3	0	4
Cluster of class I SAM-dependent methyltransferase [Mycobacterium orygis] (QOY50692.1)	QOY50692.1 [4]	29 kDa	0	0	0	0	3	3	0	0
Cluster of short-chain type dehydrogenase/reductase [Mycobacterium tuberculosis H37Rv] (NP_218065.1)	NP_218065.1 [4]	31 kDa	0	0	0	0	1	3	0	2
Cluster of type II toxin-antitoxin system Phd/YefM family antitoxin [Mycobacterium orygis] (QOY47129.1)	QOY47129.1 [4]	10 kDa	0	0	0	0	0	3	0	4
ATP synthase subunit b/delta [Mycobacterium tuberculosis H37Rv]	NP_215823.1 (+3)	49 kDa	0	2	2	0	0	3	0	4
fatty-acid--CoA ligase FadD6 [Mycobacterium tuberculosis H37Rv]	NP_215722.1 (+3)	64 kDa	0	0	2	0	0	3	0	2
amidase AmiC [Mycobacterium tuberculosis H37Rv]	NP_217404.1 (+3)	51 kDa	0	0	0	0	4	3	9	12
magnesium chelatase [Mycobacterium tuberculosis H37Rv]	NP_215473.1 (+3)	50 kDa	0	2	0	0	0	3	0	2
PLP-dependent cysteine synthase family protein [Mycobacterium orygis]	QOY48637.1 (+1)	40 kDa	0	2	0	0	4	3	9	0
hypothetical protein Rv2315c [Mycobacterium tuberculosis H37Rv]	NP_216831.1 (+3)	55 kDa	0	0	0	0	4	3	3	6
cysteine--tRNA ligase [Mycobacterium orygis]	QOY48551.1	52 kDa	0	0	0	0	0	3	0	4
hypothetical protein Rv3292 [Mycobacterium tuberculosis H37Rv]	NP_217809.1 (+3)	45 kDa	0	0	0	0	1	3	0	2
histidinol-phosphate transaminase [Mycobacterium orygis]	QOY50292.1 (+3)	41 kDa	0	0	0	0	1	3	0	0
hypothetical protein Rv3256c [Mycobacterium tuberculosis H37Rv]	NP_217773.1 (+3)	35 kDa	0	0	0	0	3	3	0	2
1,4-alpha-glucan branching protein GlgB [Mycobacterium orygis]	QOY50049.1 (+2)	82 kDa	0	0	0	0	4	3	3	2
D-alanine--D-alanine ligase [Mycobacterium tuberculosis H37Rv]	NP_217497.1 (+3)	40 kDa	0	5	2	0	0	3	0	4
isochorismate synthase [Mycobacterium tuberculosis H37Rv]	NP_217731.1 (+3)	39 kDa	0	0	0	0	0	3	0	0
argininosuccinate lyase [Mycobacterium tuberculosis H37Rv]	NP_216175.1 (+3)	50 kDa	0	0	0	0	5	3	0	0
isocitrate dehydrogenase [Mycobacterium tuberculosis H37Rv]	NP_217856.1 (+3)	46 kDa	0	0	0	0	3	3	3	4
cob(I)yrinic acid a,c-diamide adenosyltransferase [Mycobacterium tuberculosis H37Rv]	NP_215830.1 (+3)	21 kDa	0	0	2	0	4	3	0	4
hydrolase [Mycobacterium tuberculosis H37Rv]	NP_214559.1 (+3)	32 kDa	0	0	2	0	0	3	0	2
hypothetical protein Rv1598c [Mycobacterium tuberculosis H37Rv]	NP_216114.1 (+3)	15 kDa	0	0	2	0	0	3	0	2
short-chain type dehydrogenase/reductase [Mycobacterium tuberculosis H37Rv]	NP_217373.1 (+3)	27 kDa	0	0	0	0	1	3	3	2
hypothetical protein Rv0712 [Mycobacterium tuberculosis H37Rv]	NP_215226.1 (+3)	33 kDa	0	0	0	0	0	3	0	6
Holliday junction resolvase [Mycobacterium tuberculosis H37Rv]	NP_217070.1 (+3)	18 kDa	0	0	0	0	0	3	0	2
membrane protein [Mycobacterium tuberculosis H37Rv]	NP_217036.1 (+3)	8 kDa	0	0	2	0	0	3	6	2
guanylate kinase [Mycobacterium tuberculosis H37Rv]	NP_215905.1 (+3)	22 kDa	0	2	0	0	1	3	0	0
RNA-splicing ligase RtcB [Mycobacterium orygis]	QOY47723.1 (+1)	50 kDa	0	0	0	0	0	3	0	0
acetyltransferase [Mycobacterium tuberculosis H37Rv]	NP_215513.1 (+3)	36 kDa	0	0	0	0	0	3	0	2
hypothetical protein Rv2052c [Mycobacterium tuberculosis H37Rv]	NP_216568.1 (+3)	56 kDa	0	0	0	0	1	3	6	4
hypothetical protein Rv1778c [Mycobacterium tuberculosis H37Rv]	NP_216294.1 (+3)	16 kDa	0	0	0	0	1	3	6	2
phosphopantetheine adenylyltransferase [Mycobacterium tuberculosis H37Rv]	NP_217481.1 (+3)	18 kDa	0	0	0	0	1	3	0	4
hypothetical protein Rv0678 [Mycobacterium tuberculosis H37Rv]	NP_215192.1 (+3)	18 kDa	0	0	0	0	0	3	3	2
cyclic pyranopterin monophosphate synthase accessory protein [Mycobacterium tuberculosis H37Rv]	NP_217841.3 (+3)	19 kDa	0	0	2	0	0	3	0	2
anti-sigma factor RsbW [Mycobacterium tuberculosis H37Rv]	NP_217804.4 (+3)	16 kDa	0	0	0	0	0	3	3	2
hypothetical protein Rv0807 [Mycobacterium tuberculosis H37Rv]	NP_215322.1 (+3)	13 kDa	0	0	0	0	1	3	3	0
hypothetical protein Rv1466 [Mycobacterium tuberculosis H37Rv]	NP_215982.1 (+3)	12 kDa	0	2	2	0	3	3	3	4
Bile acid 7-alpha dehydratase BaiE (EC [Mycobacterium tuberculosis variant bovis AF2122/97]	CAB5248024.1 (+3)	18 kDa	0	0	2	0	1	3	6	2
hypothetical protein Rv2556c [Mycobacterium tuberculosis H37Rv]	NP_217072.1 (+3)	14 kDa	0	0	2	0	0	3	3	2
glutamine amidotransferase SnoP [Mycobacterium tuberculosis H37Rv]	NP_217120.1 (+3)	21 kDa	0	0	0	0	0	3	0	2
oxidoreductase [Mycobacterium tuberculosis H37Rv]	NP_215876.1 (+3)	37 kDa	0	0	0	0	1	3	0	0
cyclic pyranopterin monophosphate synthase accessory protein [Mycobacterium tuberculosis H37Rv]	NP_215379.1 (+2)	18 kDa	0	0	0	0	1	3	3	2
toxin MazF5 [Mycobacterium tuberculosis H37Rv]	NP_216458.1 (+3)	12 kDa	0	0	0	0	1	3	3	2
PPE family protein [Mycobacterium orygis]	QOY48156.1 (+3)	38 kDa	81	94	83	5	5	0	0	0
oxidoreductase [Mycobacterium tuberculosis H37Rv]	NP_214577.1 (+2)	49 kDa	41	52	45	15	15	0	0	0
POSSIBLE CONSERVED SECRETED PROTEIN [Mycobacterium tuberculosis variant bovis AF2122/97]	CAB5248194.1 (+3)	16 kDa	14	9	11	5	0	0	0	6
Cluster of two-component response regulator MrpA [Mycobacterium tuberculosis H37Rv] (NP_215496.2)	NP_215496.2 [2]	26 kDa	12	17	13	2	4	0	0	2
hypothetical protein Rv1910c [Mycobacterium tuberculosis H37Rv]	NP_216426.1 (+3)	20 kDa	10	9	4	12	11	0	0	4
hypothetical protein Rv0888 [Mycobacterium tuberculosis H37Rv]	NP_215403.1 (+2)	52 kDa	10	14	11	10	5	0	0	0
POSSIBLE CONSERVED SECRETED PROTEIN [Mycobacterium tuberculosis variant bovis AF2122/97]	CAB5248282.1 (+3)	12 kDa	10	14	13	5	4	0	3	4
hypothetical protein Rv1875 [Mycobacterium tuberculosis H37Rv]	NP_216391.1 (+2)	16 kDa	8	17	13	7	8	0	0	0
6-phosphogluconolactonase [Mycobacterium tuberculosis H37Rv]	NP_215961.1 (+2)	26 kDa	8	7	4	2	3	0	3	2
Cluster of PROBABLE PHOSPHOLIPASE C 4 PLCD [Mycobacterium tuberculosis variant bovis AF2122/97] (SIU00387.1)	SIU00387.1 [7]	56 kDa	8	7	4	2	4	0	0	0
Cluster of probable polyketide synthase pks15 [Mycobacterium tuberculosis variant bovis AF2122/97] (SIU01593.1)	SIU01593.1 [2]	218 kDa	8	2	7	0	0	0	6	22
mannose-6-phosphate isomerase [Mycobacterium tuberculosis H37Rv]	NP_217772.1 (+3)	43 kDa	6	0	4	15	16	0	3	6
hypothetical protein Rv1269c [Mycobacterium tuberculosis H37Rv]	NP_215785.1 (+3)	13 kDa	6	2	0	5	4	0	6	2
protease [Mycobacterium tuberculosis H37Rv]	NP_218185.1 (+3)	23 kDa	6	7	4	5	4	0	0	2
peptidoglycan-binding protein ArfA [Mycobacterium tuberculosis H37Rv]	NP_215414.1 (+3)	34 kDa	6	2	2	5	5	0	0	2
hypothetical protein Rv3269 [Mycobacterium tuberculosis H37Rv]	NP_217786.1 (+3)	10 kDa	6	7	9	2	4	0	0	4
phosphate-transport system transcriptional regulator PhoY2 [Mycobacterium tuberculosis H37Rv]	NP_215336.1 (+3)	24 kDa	6	0	0	2	10	0	6	6
argininosuccinate synthase [Mycobacterium tuberculosis H37Rv]	NP_216174.1 (+3)	44 kDa	6	2	0	0	0	0	6	6
phosphoglucosamine mutase [Mycobacterium tuberculosis H37Rv]	NP_217958.1 (+3)	46 kDa	6	2	4	0	1	0	9	6
hypothetical protein Rv0060 [Mycobacterium tuberculosis H37Rv]	NP_214574.1 (+3)	39 kDa	6	2	2	0	0	0	0	0
Cluster of inositol-3-phosphate synthase [Mycobacterium orygis] (QOY48897.1)	QOY48897.1 [4]	40 kDa	4	2	4	15	22	0	0	2
hypothetical protein Rv3267 [Mycobacterium tuberculosis H37Rv]	NP_217784.1 (+3)	51 kDa	4	9	4	12	5	0	0	4
Cluster of peroxiredoxin [Mycobacterium tuberculosis H37Rv] (NP_217037.1)	NP_217037.1 [4]	17 kDa	4	0	0	7	12	0	0	6
hypothetical protein Rv0801 [Mycobacterium tuberculosis H37Rv]	NP_215316.1 (+2)	13 kDa	4	7	7	7	5	0	0	0
RNA polymerase-binding transcription factor CarD [Mycobacterium tuberculosis H37Rv]	NP_218100.1 (+3)	18 kDa	4	0	2	5	10	0	0	6
conserved protein [Mycobacterium tuberculosis variant bovis AF2122/97]	CAB5248292.1 (+3)	10 kDa	4	2	2	5	8	0	0	2
lipoprotein LprF [Mycobacterium tuberculosis H37Rv]	NP_215884.1 (+3)	27 kDa	4	7	7	5	8	0	0	2
hypothetical protein Rv0898c [Mycobacterium tuberculosis H37Rv]	NP_215413.1 (+3)	10 kDa	4	5	4	5	0	0	0	6
ppe family protein ppe2 [Mycobacterium tuberculosis variant bovis AF2122/97]	CAB5247968.1 (+3)	57 kDa	4	5	7	5	3	0	0	0
membrane protein MmpS5 [Mycobacterium tuberculosis H37Rv]	NP_215191.1 (+3)	15 kDa	4	7	4	5	5	0	0	0
glutamine amidotransferase [Mycobacterium tuberculosis H37Rv]	NP_217375.1 (+3)	32 kDa	4	5	0	5	3	0	0	0
Metal-sensitive transcriptional repressor [Mycobacterium tuberculosis variant bovis AF2122/97]	CAB5247902.1 (+3)	10 kDa	4	5	4	2	3	0	3	2
glutamate synthase subunit beta [Mycobacterium orygis]	QOY48793.1 (+1)	53 kDa	4	2	4	2	7	0	0	4
PROBABLE POLYPEPTIDE DEFORMYLASE DEF (PDF) (FORMYLMETHIONINE DEFORMYLASE) [Mycobacterium tuberculosis variant bovis AF2122/97]	CAB5248143.1 (+3)	21 kDa	4	5	2	2	1	0	3	0
Cluster of ferredoxin reductase [Mycobacterium tuberculosis H37Rv] (NP_215202.1)	NP_215202.1 [4]	43 kDa	4	2	0	2	3	0	3	4
nitrate/nitrite response transcriptional regulator NarL [Mycobacterium tuberculosis H37Rv]	NP_215359.1 (+2)	23 kDa	4	0	0	2	4	0	0	2
ribosome maturation factor RimP [Mycobacterium tuberculosis H37Rv]	NP_217358.1 (+3)	20 kDa	4	5	2	2	4	0	3	4
S-adenosyl-L-methionine-dependent methyltransferase [Mycobacterium tuberculosis H37Rv]	NP_216412.1 (+3)	33 kDa	4	0	0	2	0	0	3	2
universal stress protein [Mycobacterium tuberculosis H37Rv]	NP_216521.1 (+3)	31 kDa	4	0	2	2	0	0	0	2
ISONIAZID INDUCTIBLE GENE PROTEIN INIB [Mycobacterium tuberculosis variant bovis AF2122/97]	CAB5248054.1 (+2)	44 kDa	4	5	7	2	3	0	0	0
Cluster of methionyl-tRNA formyltransferase [Mycobacterium tuberculosis H37Rv] (NP_215922.1)	NP_215922.1 [4]	33 kDa	4	0	0	0	1	0	0	2
hypothetical protein Rv2406c [Mycobacterium tuberculosis H37Rv]	NP_216922.1 (+3)	15 kDa	4	2	0	0	1	0	3	2
phosphoribosylaminoimidazole-succinocarboxamide synthase [Mycobacterium tuberculosis H37Rv]	NP_215294.1 (+3)	33 kDa	4	5	2	0	1	0	3	4
3'-phosphoadenosine 5'-phosphate phosphatase [Mycobacterium tuberculosis H37Rv]	NP_216647.1 (+3)	28 kDa	4	5	2	0	3	0	3	2
nitrogen regulatory protein P-II [Mycobacterium tuberculosis H37Rv]	NP_217435.1 (+3)	12 kDa	4	2	2	0	4	0	3	4
UDP-N-acetylmuramoyl-tripeptide--D-alanyl-D-alanine ligase [Mycobacterium tuberculosis H37Rv]	NP_216673.1 (+3)	52 kDa	4	2	0	0	0	0	0	0
Cluster of hypothetical protein RJtmp_002438 [Mycobacterium orygis] (QOY47476.1)	QOY47476.1 [4]	15 kDa	4	0	0	0	0	0	3	0
M28 family metallopeptidase [Mycobacterium tuberculosis]	gnl|extdb|pgaptmp_001884	43 kDa	4	2	0	0	3	0	0	0
phosphate transport system transcriptional regulator PhoY [Mycobacterium tuberculosis H37Rv]	NP_217818.1 (+3)	25 kDa	4	2	2	0	3	0	0	2
acetyl-CoAsynthetase [Mycobacterium tuberculosis H37Rv]	NP_218184.1 (+2)	71 kDa	4	5	0	0	0	0	0	0
uracil-DNA glycosylase [Mycobacterium tuberculosis H37Rv]	NP_217492.1 (+3)	24 kDa	4	2	0	0	0	0	0	0
Holliday junction ATP-dependent DNA helicase RuvA [Mycobacterium tuberculosis H37Rv]	NP_217109.1 (+3)	20 kDa	4	7	2	0	0	0	0	0
hypothetical protein Rv3013 [Mycobacterium tuberculosis H37Rv]	NP_217529.1 (+3)	23 kDa	4	0	0	0	0	0	6	2
Ketosteroid isomerase-related protein [Mycobacterium tuberculosis variant bovis AF2122/97]	CAB5247851.1 (+3)	15 kDa	4	0	0	0	1	0	0	8
two component transcriptional regulator TrcR [Mycobacterium tuberculosis H37Rv]	NP_215549.1 (+3)	29 kDa	4	0	2	0	1	0	0	2
DJ-1/PfpI family protein [Mycobacterium tuberculosis]	gnl|extdb|pgaptmp_000057	23 kDa	4	0	4	0	3	0	0	0
membrane protein [Mycobacterium tuberculosis H37Rv]	NP_217091.1 (+2)	31 kDa	4	2	7	0	10	0	0	0
probable bifunctional mta/sah nucleosidase mtn: 5'-methylthioadenosine nucleosidase (methylthioadenosine methylthioribohydrolase) + s-adenosylhomocysteine nucleosidase (s-adenosyl-l-homocysteine homocysteinylribohydrolase) [Mycobacterium tuberculosis variant bovis AF2122/97]	CAB5247797.1 (+3)	27 kDa	4	0	0	0	0	0	0	0
oxidoreductase [Mycobacterium tuberculosis H37Rv]	NP_216290.1 (+2)	48 kDa	4	2	4	0	3	0	0	0
hypothetical protein Rv3268 [Mycobacterium tuberculosis H37Rv]	NP_217785.3 (+3)	24 kDa	4	5	4	0	0	0	0	4
hypothetical protein Rv3748 [Mycobacterium tuberculosis H37Rv]	NP_218265.1 (+3)	13 kDa	4	0	2	0	0	0	3	4
glycerolphosphodiesterase [Mycobacterium tuberculosis H37Rv]	NP_216793.1 (+2)	32 kDa	4	0	2	0	0	0	3	6
lipoprotein LppW [Mycobacterium tuberculosis H37Rv]	NP_217421.1 (+2)	33 kDa	4	5	0	0	7	0	0	0
Cluster of phosphate ABC transporter substrate-binding lipoprotein PstS [Mycobacterium tuberculosis H37Rv] (YP_177770.1)	YP_177770.1 [4]	38 kDa	2	5	2	73	49	0	3	2
multifunctional mycocerosic acid synthase [Mycobacterium tuberculosis H37Rv]	NP_217456.1 (+2)	224 kDa	2	0	4	34	27	0	6	70
lipoprotein LpqR [Mycobacterium tuberculosis H37Rv]	NP_215353.1 (+3)	27 kDa	2	5	2	17	20	0	0	0
Cluster of NADH-quinone oxidoreductase subunit G [Mycobacterium tuberculosis H37Rv] (NP_217667.1)	NP_217667.1 [3]	85 kDa	2	0	0	15	26	0	0	4
proteasome subunit beta [Mycobacterium tuberculosis H37Rv]	NP_216626.1 (+3)	30 kDa	2	2	0	15	15	0	0	0
Cluster of DNA topoisomerase I [Mycobacterium tuberculosis H37Rv] (NP_218163.1)	NP_218163.1 [4]	102 kDa	2	0	2	10	7	0	0	4
hypothetical protein Rv1836c [Mycobacterium tuberculosis H37Rv]	NP_216352.1 (+2)	70 kDa	2	2	2	7	7	0	3	6
chorismate mutase [Mycobacterium tuberculosis H37Rv]	NP_216401.1 (+3)	22 kDa	2	0	0	7	8	0	0	0
50S ribosomal protein L23 [Mycobacterium tuberculosis H37Rv]	NP_215217.1 (+3)	11 kDa	2	2	2	7	1	0	3	2
hypothetical protein Rv0813c [Mycobacterium tuberculosis H37Rv]	NP_215328.1 (+3)	24 kDa	2	2	2	7	10	0	3	4
NADH-quinone oxidoreductase subunit D [Mycobacterium tuberculosis H37Rv]	NP_217664.1 (+3)	48 kDa	2	0	2	7	0	0	0	0
polyphosphate kinase [Mycobacterium tuberculosis H37Rv]	NP_217500.1 (+3)	83 kDa	2	0	0	5	5	0	3	0
oxidoreductase [Mycobacterium tuberculosis H37Rv]	NP_217927.1 (+3)	39 kDa	2	0	2	5	8	0	3	0
probable short-chain type oxidoreductase [Mycobacterium tuberculosis variant bovis AF2122/97]	CAB5248201.1 (+3)	26 kDa	2	2	0	5	12	0	0	6
hypothetical protein Rv1157c [Mycobacterium tuberculosis H37Rv]	NP_215673.1 (+3)	36 kDa	2	2	0	5	0	0	3	4
Cluster of transcriptional repressor SirR [Mycobacterium tuberculosis H37Rv] (NP_217304.1)	NP_217304.1 [4]	25 kDa	2	2	0	5	7	0	3	2
hypothetical protein Rv3788 [Mycobacterium tuberculosis H37Rv]	NP_218305.1 (+3)	17 kDa	2	5	4	5	3	0	3	2
hypothetical protein Rv1419 [Mycobacterium tuberculosis H37Rv]	NP_215935.1 (+3)	17 kDa	2	0	2	5	5	0	0	0
penicillin-binding protein DacB [Mycobacterium tuberculosis H37Rv]	NP_217847.1 (+3)	42 kDa	2	2	0	5	4	0	0	2
two component transcriptional regulator DevR [Mycobacterium tuberculosis H37Rv]	NP_217649.1 (+3)	23 kDa	2	2	2	5	5	0	3	2
hypothetical protein Rv0613c [Mycobacterium tuberculosis H37Rv]	NP_215127.1 (+2)	93 kDa	2	2	4	2	7	0	0	0
serine/threonine protein kinase PknG [Mycobacterium orygis]	QOY49224.1 (+3)	82 kDa	2	0	0	2	3	0	0	0
class 1b ribonucleoside-diphosphate reductase subunit alpha [Mycobacterium orygis]	QOY48090.1 (+1)	82 kDa	2	0	0	2	7	0	0	2
hypothetical protein Rv3046c [Mycobacterium tuberculosis H37Rv]	NP_217562.1 (+3)	13 kDa	2	0	0	2	1	0	0	0
PROBABLE PEPTIDE METHIONINE SULFOXIDE REDUCTASE MSRA (PROTEIN-METHIONINE-S-OXIDE REDUCTASE) (PEPTIDE MET(O) REDUCTASE) [Mycobacterium tuberculosis variant bovis AF2122/97]	CAB5247847.1 (+3)	20 kDa	2	0	0	2	3	0	0	0
ESX-1 secretion-associated protein EspD [Mycobacterium tuberculosis H37Rv]	NP_218131.1 (+3)	20 kDa	2	2	2	2	5	0	0	0
response regulator [Mycobacterium tuberculosis H37Rv]	NP_217659.1 (+3)	14 kDa	2	9	4	2	5	0	3	2
4-hydroxy-2-oxovalerate aldolase [Mycobacterium tuberculosis H37Rv]	NP_218051.1 (+3)	36 kDa	2	2	2	2	5	0	0	0
hypothetical protein Rv1433 [Mycobacterium tuberculosis H37Rv]	NP_215949.1 (+3)	29 kDa	2	5	0	2	0	0	0	0
RNase E regulator RraA [Mycobacterium tuberculosis H37Rv]	NP_218370.1 (+3)	16 kDa	2	2	4	2	4	0	3	2
hypothetical protein Rv1156 [Mycobacterium tuberculosis H37Rv]	NP_215672.1 (+3)	21 kDa	2	0	0	2	4	0	3	0
hypothetical protein Rv1829 [Mycobacterium tuberculosis H37Rv]	NP_216345.1 (+2)	18 kDa	2	0	0	2	4	0	6	4
ESX-5 type VII secretion system protein EccB5 [Mycobacterium tuberculosis H37Rv]	NP_216298.1 (+3)	54 kDa	2	0	0	2	5	0	0	0
hypothetical protein RJtmp_000066 [Mycobacterium orygis]	QOY48911.1 (+3)	12 kDa	2	2	2	2	3	0	0	2
flavin-dependent monooxygenase oxygenase subunit HsaA [Mycobacterium tuberculosis H37Rv]	NP_218087.1	43 kDa	2	0	0	2	8	0	0	0
hypothetical protein Rv0038 [Mycobacterium tuberculosis H37Rv]	NP_214552.1 (+3)	22 kDa	2	0	0	2	1	0	0	0
fructose 1,6-bisphosphatase [Mycobacterium tuberculosis H37Rv]	NP_215615.3 (+3)	38 kDa	2	2	0	2	3	0	0	0
chalcone synthase [Mycobacterium tuberculosis H37Rv]	NP_216181.1 (+3)	38 kDa	2	5	4	2	4	0	0	0
hypothetical protein Rv0999 [Mycobacterium tuberculosis H37Rv]	NP_215514.1 (+3)	26 kDa	2	0	0	2	5	0	3	0
epoxide hydrolase EphB [Mycobacterium tuberculosis H37Rv]	NP_216454.1 (+2)	39 kDa	2	0	0	2	1	0	0	0
phenylalanine--tRNA ligase subunit alpha [Mycobacterium orygis]	QOY50335.1 (+2)	39 kDa	2	0	0	2	1	0	0	0
Cluster of D-alanyl-D-alanine carboxypeptidase/D-alanyl-D-alanine-endopeptidase [Mycobacterium orygis] (QOY48588.1)	QOY48588.1 [3]	47 kDa	2	0	0	2	12	0	0	0
2C-methyl-D-erythritol 2,4-cyclodiphosphate synthase [Mycobacterium tuberculosis H37Rv]	NP_218098.1 (+3)	16 kDa	2	0	0	2	3	0	0	0
TIGR04255 family protein [Mycobacterium orygis]	QOY50608.1 (+1)	30 kDa	2	5	0	2	5	0	0	0
PROBABLE CONSERVED TRANSMEMBRANE TRANSPORT PROTEIN MMPL4 [Mycobacterium tuberculosis variant bovis AF2122/97]	CAB5248164.1 (+3)	105 kDa	2	2	2	2	1	0	0	0
Conserved protein [Mycobacterium tuberculosis variant bovis AF2122/97]	CAB5248109.1 (+3)	9 kDa	2	2	0	2	3	0	0	2
hypoxic response protein [Mycobacterium tuberculosis H37Rv]	NP_217142.1 (+3)	16 kDa	2	0	2	2	5	0	0	2
PROBABLE TRANSCRIPTIONAL REGULATORY PROTEIN [Mycobacterium tuberculosis variant bovis AF2122/97]	CAB5247787.1 (+3)	12 kDa	2	0	0	2	4	0	0	0
hypothetical protein Rv3040c [Mycobacterium tuberculosis H37Rv]	NP_217556.1 (+3)	31 kDa	2	0	0	2	3	0	0	0
anion transporter ATPase [Mycobacterium tuberculosis H37Rv]	NP_218196.1 (+3)	36 kDa	2	0	2	2	3	0	0	0
hypothetical protein Rv3491 [Mycobacterium tuberculosis H37Rv]	NP_218008.1 (+3)	20 kDa	2	0	0	0	0	0	3	0
endonuclease IV [Mycobacterium tuberculosis H37Rv]	NP_215184.1 (+3)	27 kDa	2	2	2	0	4	0	3	6
methylmalonyl-CoA mutase small subunit [Mycobacterium tuberculosis H37Rv]	NP_216008.1 (+3)	65 kDa	2	2	4	0	8	0	0	0
nucleoside triphosphate pyrophosphohydrolase [Mycobacterium tuberculosis H37Rv]	NP_215537.1 (+3)	35 kDa	2	2	0	0	1	0	9	2
Cluster of FAD-dependent oxidoreductase [Mycobacterium orygis] (QOY50557.1)	QOY50557.1 [4]	34 kDa	2	0	0	0	1	0	0	2
hypothetical protein Rv2749 [Mycobacterium tuberculosis H37Rv]	NP_217265.1 (+3)	11 kDa	2	2	0	0	3	0	3	2
PROBABLE DEOXYRIBOSE-PHOSPHATE ALDOLASE DEOC (PHOSPHODEOXYRIBOALDOLASE) (DEOXYRIBOALDOLASE) [Mycobacterium tuberculosis variant bovis AF2122/97]	CAB5248195.1 (+3)	22 kDa	2	0	0	0	0	0	0	2
amidohydrolase [Mycobacterium tuberculosis H37Rv]	NP_214994.2 (+2)	29 kDa	2	0	2	0	0	0	3	2
Cluster of pknH1 [Mycobacterium tuberculosis variant bovis AF2122/97] (SIT99898.1)	SIT99898.1 [3]	64 kDa	2	5	4	0	3	0	0	0
hypothetical protein Rv2557 [Mycobacterium tuberculosis H37Rv]	NP_217073.1 (+2)	24 kDa	2	2	2	0	1	0	0	2
hypothetical protein RJtmp_003496 [Mycobacterium orygis]	QOY48388.1 (+3)	25 kDa	2	0	0	0	0	0	0	0
4,5:9,10-diseco-3-hydroxy-5,9,17-trioxoandrosta-1(10),2-diene-4-oate hydrolase [Mycobacterium tuberculosis H37Rv]	NP_218086.1 (+3)	32 kDa	2	0	0	0	10	0	0	2
LacI family transcriptional regulator [Mycobacterium tuberculosis H37Rv]	NP_218092.1 (+3)	38 kDa	2	0	0	0	0	0	0	0
protein translocase subunit SecA [Mycobacterium tuberculosis H37Rv]	NP_216337.1 (+3)	89 kDa	2	5	0	0	0	0	0	8
hypothetical protein Rv3033 [Mycobacterium tuberculosis H37Rv]	NP_217549.1 (+3)	19 kDa	2	2	0	0	0	0	0	2
Cluster of S-nitrosomycothiol reductase MscR [Mycobacterium tuberculosis H37Rv] (NP_216775.1)	NP_216775.1 [4]	38 kDa	2	2	0	0	7	0	0	0
4-carboxymuconolactone decarboxylase [Mycobacterium tuberculosis H37Rv]	NP_215285.1 (+3)	16 kDa	2	0	0	0	1	0	0	0
Cluster of inosine-5'-monophosphate dehydrogenase [Mycobacterium tuberculosis H37Rv] (NP_217928.1)	NP_217928.1 [4]	55 kDa	2	2	2	0	0	0	0	2
Cluster of f420-dependent glucose-6-phosphate dehydrogenase fgd1 [Mycobacterium tuberculosis variant bovis AF2122/97] (CAB5248121.1)	CAB5248121.1 [4]	37 kDa	2	0	0	0	0	0	0	0
Cluster of transcriptional regulator WhiA [Mycobacterium tuberculosis H37Rv] (NP_215939.1)	NP_215939.1 [4]	35 kDa	2	0	0	0	1	0	0	4
Cluster of glucose-6-phosphate dehydrogenase assembly protein OpcA [Mycobacterium orygis] (QOY50162.1)	QOY50162.1 [4]	33 kDa	2	5	0	0	0	0	0	0
Cluster of ParA family protein [Mycobacterium orygis] (QOY48229.1)	QOY48229.1 [4]	29 kDa	2	0	0	0	0	0	0	0
Cluster of signal recognition particle receptor FtsY [Mycobacterium tuberculosis H37Rv] (NP_217437.1)	NP_217437.1 [4]	44 kDa	2	0	0	0	1	0	0	0
Cluster of DIHYDROPTEROATE SYNTHASE 1 FOLP (DHPS 1) (DIHYDROPTEROATE PYROPHOSPHORYLASE 1) (DIHYDROPTEROATE DIPHOSPHORYLASE 1) [Mycobacterium tuberculosis variant bovis AF2122/97] (SIU02266.1)	SIU02266.1 [4]	29 kDa	2	0	2	0	0	0	0	0
glucosamine--fructose-6-phosphate aminotransferase [Mycobacterium tuberculosis H37Rv]	NP_217953.1 (+3)	68 kDa	2	0	0	0	1	0	0	0
50S ribosomal protein L5 [Mycobacterium tuberculosis H37Rv]	NP_215230.1 (+3)	21 kDa	2	0	0	0	1	0	0	0
glycine--tRNA ligase [Mycobacterium tuberculosis H37Rv]	NP_216873.1 (+3)	53 kDa	2	0	0	0	3	0	0	0
membrane protein [Mycobacterium tuberculosis H37Rv]	NP_214741.1	46 kDa	2	0	0	0	0	0	0	0
PROBABLE ACYL-CoA DEHYDROGENASE FADE2 [Mycobacterium tuberculosis variant bovis AF2122/97]	CAB5247864.1 (+3)	44 kDa	2	0	0	0	4	0	0	0
chromosome partitioning protein ParB [Mycobacterium tuberculosis H37Rv]	NP_218435.2 (+3)	37 kDa	2	0	0	0	0	0	0	0
O-acetylhomoserine sulfhydrylase [Mycobacterium tuberculosis H37Rv]	NP_217857.1 (+2)	47 kDa	2	0	2	0	4	0	3	2
PUTATIVE CONSERVED ATPASE [Mycobacterium tuberculosis variant bovis AF2122/97]	CAB5248149.1 (+3)	75 kDa	2	0	0	0	0	0	0	0
fatty-acid--CoA ligase FadD36 [Mycobacterium tuberculosis H37Rv]	NP_215709.1 (+3)	50 kDa	2	0	0	0	0	0	0	2
folylpolyglutamate synthase FolC [Mycobacterium tuberculosis H37Rv]	NP_216963.1 (+2)	51 kDa	2	0	0	0	0	0	0	0
methyltransferase [Mycobacterium tuberculosis H37Rv]	NP_217138.1 (+3)	30 kDa	2	2	2	0	0	0	0	0
hypothetical protein Rv2172c [Mycobacterium tuberculosis H37Rv]	NP_216688.1 (+3)	33 kDa	2	0	0	0	3	0	0	2
urease accessory protein UreG [Mycobacterium tuberculosis H37Rv]	NP_216368.1 (+3)	23 kDa	2	0	0	0	0	0	0	2
polyphosphate glucokinase [Mycobacterium tuberculosis H37Rv]	NP_217218.1	27 kDa	2	2	2	0	0	0	3	4
PROBABLE ACYL-CoA DEHYDROGENASE FADE1 [Mycobacterium tuberculosis variant bovis AF2122/97]	CAB5247838.1 (+3)	50 kDa	2	0	0	0	1	0	0	2
cell division protein FtsQ [Mycobacterium tuberculosis H37Rv]	NP_216667.1 (+3)	34 kDa	2	0	0	0	1	0	0	0
membrane-anchored mycosin MycP [Mycobacterium tuberculosis H37Rv]	NP_216312.1 (+3)	60 kDa	2	0	2	0	4	0	0	2
O-phosphoserine sulfhydrylase [Mycobacterium tuberculosis H37Rv]	NP_215852.1 (+3)	34 kDa	2	2	0	0	1	0	3	2
conserved protein [Mycobacterium tuberculosis variant bovis AF2122/97]	CAB5248243.1 (+3)	15 kDa	2	0	0	0	0	0	0	0
hypothetical protein Rv2135c [Mycobacterium tuberculosis H37Rv]	NP_216651.1 (+3)	25 kDa	2	0	0	0	4	0	0	2
short-chain type dehydrogenase/reductase [Mycobacterium tuberculosis H37Rv]	NP_218019.1 (+3)	33 kDa	2	2	0	0	0	0	0	0
ATP phosphoribosyltransferase [Mycobacterium tuberculosis H37Rv]	NP_216637.1 (+3)	30 kDa	2	0	0	0	1	0	0	0
inositol-1-monophosphatase SuhB [Mycobacterium tuberculosis H37Rv]	NP_217217.1 (+3)	30 kDa	2	0	0	0	0	0	0	2
hypothetical protein Rv1871c [Mycobacterium tuberculosis H37Rv]	NP_216387.1 (+3)	15 kDa	2	0	0	0	1	0	0	0
S9 family peptidase [Mycobacterium orygis]	QOY49568.1 (+2)	80 kDa	2	0	2	0	0	0	0	2
benzoquinone methyltransferase [Mycobacterium orygis]	QOY49365.1 (+1)	24 kDa	2	2	2	0	1	0	0	4
adenylyl cyclase [Mycobacterium tuberculosis H37Rv]	NP_216728.1 (+3)	40 kDa	2	2	0	0	1	0	6	2
PROBABLE CONSERVED MEMBRANE PROTEIN [Mycobacterium tuberculosis variant bovis AF2122/97]	CAB5247911.1 (+3)	24 kDa	2	0	0	0	0	0	3	2
hypothetical protein Rv3079c [Mycobacterium tuberculosis H37Rv]	NP_217595.1 (+3)	30 kDa	2	0	0	0	3	0	0	0
lipase LipV [Mycobacterium orygis]	QOY48220.1 (+2)	28 kDa	2	0	0	0	0	0	0	0
hypothetical protein Rv2675c [Mycobacterium tuberculosis H37Rv]	NP_217191.1 (+3)	28 kDa	2	0	2	0	5	0	0	2
hypothetical protein Rv3786c [Mycobacterium tuberculosis H37Rv]	NP_218303.1 (+3)	45 kDa	2	0	0	0	0	0	0	2
HTH-type transcriptional regulator SmtB [Mycobacterium tuberculosis H37Rv]	NP_216874.1 (+3)	14 kDa	2	2	2	0	1	0	3	4
bifunctional glutamate N-acetyltransferase/amino-acid acetyltransferase [Mycobacterium tuberculosis H37Rv]	NP_216169.1 (+3)	41 kDa	2	0	2	0	4	0	0	2
phosphoglycerate mutase [Mycobacterium tuberculosis H37Rv]	NP_218354.1 (+2)	25 kDa	2	2	0	0	0	0	0	0
POSSIBLE TRANSCRIPTIONAL REGULATORY PROTEIN [Mycobacterium tuberculosis variant bovis AF2122/97]	CAB5247845.1 (+3)	22 kDa	2	0	0	0	1	0	0	2
conserved protein [Mycobacterium tuberculosis variant bovis AF2122/97]	CAB5248265.1 (+3)	11 kDa	2	0	0	0	1	0	0	2
type VII secretion system ESX-1 target PPE68 [Mycobacterium orygis]	QOY48808.1 (+3)	37 kDa	2	2	2	0	0	0	0	0
ribulose-phosphate 3-epimerase [Mycobacterium tuberculosis H37Rv]	NP_215924.1 (+3)	24 kDa	2	0	0	0	0	0	0	0
enoyl-CoA hydratase EchA17 [Mycobacterium tuberculosis H37Rv]	NP_217555.1 (+3)	27 kDa	2	0	0	0	5	0	0	2
hypothetical protein Rv1126c [Mycobacterium tuberculosis H37Rv]	NP_215642.1 (+3)	22 kDa	2	2	0	0	5	0	0	2
ribonuclease Z [Mycobacterium tuberculosis H37Rv]	NP_216923.1 (+3)	29 kDa	2	2	2	0	0	0	0	0
lipoprotein LppM [Mycobacterium tuberculosis H37Rv]	NP_216687.1 (+3)	24 kDa	2	2	0	0	1	0	0	0
8-oxo-dGTP diphosphatase [Mycobacterium tuberculosis H37Rv]	NP_215676.1 (+3)	15 kDa	2	0	0	0	3	0	0	2
POSSIBLE TRANSCRIPTIONAL REGULATORY PROTEIN (PROBABLY TETR-FAMILY) [Mycobacterium tuberculosis variant bovis AF2122/97]	CAB5247950.1 (+3)	22 kDa	2	0	2	0	0	0	0	2
hypothetical protein Rv2619c [Mycobacterium tuberculosis H37Rv]	NP_217135.1 (+3)	12 kDa	2	0	4	0	0	0	0	0
hypothetical protein Rv0887c [Mycobacterium tuberculosis H37Rv]	NP_215402.1 (+3)	16 kDa	2	0	0	0	1	0	3	0
EthD domain-containing protein [Mycobacterium tuberculosis]	gnl|extdb|pgaptmp_001987	26 kDa	2	2	0	0	0	0	0	0
molybdopterin synthase catalytic subunit 2 [Mycobacterium tuberculosis H37Rv]	NP_215381.1 (+3)	15 kDa	2	0	0	0	4	0	0	0
FMN binding protein [Mycobacterium tuberculosis variant bovis AF2122/97]	CAB5248155.1 (+3)	15 kDa	2	2	0	0	1	0	0	0
hydrolase [Mycobacterium tuberculosis H37Rv]	NP_218108.1 (+3)	29 kDa	2	0	0	0	0	0	0	0
lipoprotein LpqA [Mycobacterium tuberculosis H37Rv]	NP_217532.1 (+3)	22 kDa	2	0	0	0	0	0	0	0
possible s-adenosylmethionine-dependent methyltransferase [Mycobacterium tuberculosis variant bovis AF2122/97]	CAB5247855.1 (+2)	34 kDa	2	0	0	0	0	0	0	0
esx-1 secretion-associated protein espj. conserved alanine rich protein [Mycobacterium tuberculosis variant bovis AF2122/97]	SIU02540.1	27 kDa	2	2	0	0	0	0	0	0
chorismate mutase [Mycobacterium tuberculosis H37Rv]	NP_215463.1 (+3)	12 kDa	2	0	0	0	0	0	0	0
type VII secretion system ESX-1 target PE35 [Mycobacterium orygis]	QOY48807.1 (+3)	10 kDa	2	2	2	0	1	0	0	2
hypothetical protein Rv0907 [Mycobacterium tuberculosis H37Rv]	NP_215422.1 (+2)	57 kDa	2	0	0	0	0	0	0	0
polyketide synthase [Mycobacterium tuberculosis H37Rv]	NP_218317.1 (+1)	186 kDa	0	0	0	49	52	0	0	42
Cluster of inosine-5'-monophosphate dehydrogenase [Mycobacterium tuberculosis H37Rv] (NP_216359.1)	NP_216359.1 [3]	50 kDa	0	0	0	29	33	0	0	0
hypothetical protein Rv1891 [Mycobacterium tuberculosis H37Rv]	NP_216407.1 (+3)	14 kDa	0	0	0	20	14	0	0	0
CDP-diacylglycerol pyrophosphatase [Mycobacterium tuberculosis H37Rv]	NP_216805.1 (+3)	29 kDa	0	0	0	15	16	0	0	2
L-alanine dehydrogenase [Mycobacterium tuberculosis H37Rv]	NP_217296.1 (+1)	39 kDa	0	0	0	15	24	0	0	0
enoyl-CoA hydratase EchA1 [Mycobacterium tuberculosis H37Rv]	NP_214736.1 (+1)	27 kDa	0	0	0	15	19	0	0	0
Cluster of PROBABLE NAD-DEPENDENT GLUTAMATE DEHYDROGENASE GDH (NAD-GDH) (NAD-DEPENDENT GLUTAMIC DEHYDROGENASE) [Mycobacterium tuberculosis variant bovis AF2122/97] (SIU01119.1)	SIU01119.1 [2]	177 kDa	0	0	4	12	22	0	0	8
Cluster of phenylalanine--tRNA ligase subunit beta [Mycobacterium orygis] (QOY50336.1)	QOY50336.1 [4]	88 kDa	0	0	2	12	7	0	0	2
hypothetical protein Rv2159c [Mycobacterium tuberculosis H37Rv]	NP_216675.1 (+2)	36 kDa	0	0	0	12	22	0	0	0
nicotinate-nucleotide pyrophosphatase [Mycobacterium tuberculosis H37Rv]	NP_216112.1	30 kDa	0	0	0	12	14	0	3	2
lipoprotein LppD [Mycobacterium tuberculosis H37Rv]	NP_216415.1	35 kDa	0	2	2	12	10	0	11	8
DUF3117 domain-containing protein [Mycobacterium orygis]	QOY49937.1 (+1)	6 kDa	0	0	0	12	12	0	0	2
hypothetical protein Rv1498A [Mycobacterium tuberculosis H37Rv]	YP_177647.1 (+1)	8 kDa	0	2	0	12	7	0	0	0
fatty-acid--CoA ligase FadD31 [Mycobacterium tuberculosis H37Rv]	NP_216441.2 (+3)	66 kDa	0	0	0	10	5	0	0	0
CTP synthase [Mycobacterium tuberculosis H37Rv]	NP_216215.1 (+3)	64 kDa	0	0	0	10	5	0	0	0
Cluster of dioxygenase [Mycobacterium tuberculosis H37Rv] (NP_217677.1)	NP_217677.1 [2]	43 kDa	0	0	0	10	18	0	0	0
arginine deiminase [Mycobacterium tuberculosis H37Rv]	NP_215517.1 (+3)	43 kDa	0	0	0	10	12	0	0	2
hypothetical protein Rv3835 [Mycobacterium tuberculosis H37Rv]	NP_218352.1 (+3)	47 kDa	0	0	0	10	5	0	0	0
DUF2695 domain-containing protein [Mycobacterium orygis]	QOY47401.1	12 kDa	0	0	2	10	5	0	0	0
ribonuclease E [Mycobacterium tuberculosis H37Rv]	NP_216960.1 (+3)	103 kDa	0	0	0	7	12	0	0	6
Cluster of acyl-CoA dehydrogenase FadE23 [Mycobacterium tuberculosis H37Rv] (NP_217656.1)	NP_217656.1 [4]	43 kDa	0	0	0	7	5	0	0	0
Cluster of phthiocerol synthesis polyketide synthase type I PpsE [Mycobacterium tuberculosis H37Rv] (NP_217451.1)	NP_217451.1 [4]	159 kDa	0	0	0	7	8	0	0	22
Cluster of oxidoreductase [Mycobacterium tuberculosis H37Rv] (NP_216814.1)	NP_216814.1 [4]	35 kDa	0	0	2	7	10	0	6	6
Cluster of proteasome subunit alpha [Mycobacterium orygis] (QOY47254.1)	QOY47254.1 [2]	27 kDa	0	0	0	7	10	0	0	0
Cluster of phosphomethylpyrimidine synthase ThiC [Mycobacterium orygis] (QOY49238.1)	QOY49238.1 [4]	60 kDa	0	0	0	7	14	0	0	0
cytidine deaminase [Mycobacterium tuberculosis H37Rv]	NP_217832.1 (+3)	14 kDa	0	0	2	7	4	0	3	4
alkyl hydroperoxide reductase subunit AhpC [Mycobacterium tuberculosis H37Rv]	NP_216944.1 (+3)	22 kDa	0	0	0	7	8	0	0	0
Cluster of threonylcarbamoyl-AMP synthase [Mycobacterium tuberculosis H37Rv] (NP_215817.1)	NP_215817.1 [4]	23 kDa	0	2	4	7	5	0	6	6
DUF3152 domain-containing protein [Mycobacterium tuberculosis]	gnl|extdb|pgaptmp_003412	38 kDa	0	0	0	5	10	0	0	2
Cluster of glycine betaine/carnitine/choline/L-proline ABC transporter substrate-binding lipoprotein ProX [Mycobacterium tuberculosis H37Rv] (NP_218276.1)	NP_218276.1 [3]	33 kDa	0	0	2	5	5	0	0	0
DNA ligase A [Mycobacterium tuberculosis H37Rv]	NP_217530.1 (+3)	75 kDa	0	0	0	5	11	0	0	2
peptide chain release factor PrfA [Mycobacterium tuberculosis H37Rv]	NP_215815.1 (+3)	39 kDa	0	2	0	5	5	0	3	4
pyridoxamine 5'-phosphate oxidase [Mycobacterium tuberculosis H37Rv]	NP_216590.1 (+1)	15 kDa	0	0	0	5	4	0	0	0
ppe family protein ppe10 [Mycobacterium tuberculosis variant bovis AF2122/97]	CAB5248156.1 (+3)	46 kDa	0	0	0	5	4	0	0	0
valine--tRNA ligase [Mycobacterium orygis]	QOY47553.1 (+1)	99 kDa	0	0	0	5	16	0	0	2
acyl-CoA dehydrogenase FadE24 [Mycobacterium tuberculosis H37Rv]	NP_217655.1 (+3)	50 kDa	0	0	0	5	1	0	0	0
propionyl-CoA carboxylase subunit beta AccD [Mycobacterium tuberculosis H37Rv]	NP_218316.2 (+3)	57 kDa	0	0	0	5	11	0	0	0
type II toxin-antitoxin system Phd/YefM family antitoxin [Mycobacterium tuberculosis]	gnl|extdb|pgaptmp_003621 (+2)	10 kDa	0	0	0	5	1	0	0	0
50S ribosomal protein L24 [Mycobacterium tuberculosis H37Rv]	NP_215229.1 (+3)	11 kDa	0	5	11	5	5	0	3	6
RNA polymerase sigma factor SigA [Mycobacterium tuberculosis H37Rv]	NP_217219.1 (+3)	58 kDa	0	0	2	5	1	0	0	4
Cluster of POSSIBLE CONSERVED TRANSMEMBRANE TRANSPORT PROTEIN MMPL3 [Mycobacterium tuberculosis variant bovis AF2122/97] (CAB5247918.1)	CAB5247918.1 [4]	101 kDa	0	0	0	5	3	0	0	2
GTP-binding protein LepA [Mycobacterium tuberculosis H37Rv]	NP_216920.1 (+3)	72 kDa	0	0	0	5	5	0	0	0
hypothetical protein Rv2510c [Mycobacterium tuberculosis H37Rv]	NP_217026.1 (+3)	57 kDa	0	0	0	5	3	0	0	0
hypothetical protein RJtmp_003291 [Mycobacterium orygis]	QOY48210.1 (+3)	6 kDa	0	0	0	5	8	0	3	4
CAP domain-containing protein [Mycobacterium tuberculosis]	gnl|extdb|pgaptmp_002091 (+1)	24 kDa	0	0	0	5	1	0	0	0
homoserine dehydrogenase [Mycobacterium tuberculosis H37Rv]	NP_215810.1 (+3)	46 kDa	0	2	0	5	3	0	0	4
hypothetical protein Rv2067c [Mycobacterium tuberculosis H37Rv]	NP_216583.1 (+2)	46 kDa	0	0	0	5	3	0	0	0
Cluster of multifunctional 2-oxoglutarate dehydrogenase E1 component /2-oxoglutarate dehydrogenase dihydrolipoyllysine-residue succinyltransferase [Mycobacterium tuberculosis H37Rv] (NP_215764.2)	NP_215764.2 [4]	136 kDa	0	0	0	5	1	0	3	14
Cluster of NAD(P)H nitroreductase [Mycobacterium tuberculosis H37Rv] (NP_216548.1)	NP_216548.1 [4]	37 kDa	0	0	0	5	3	0	0	0
Cluster of oligoribonuclease [Mycobacterium tuberculosis H37Rv] (NP_217027.1)	NP_217027.1 [4]	23 kDa	0	0	0	5	1	0	0	0
diacyltrehalose acyltransferase Chp2 [Mycobacterium tuberculosis]	gnl|extdb|pgaptmp_001272 (+3)	38 kDa	0	0	0	5	0	0	0	0
nonspecific lipid-transfer protein [Mycobacterium tuberculosis H37Rv]	NP_216143.1 (+3)	42 kDa	0	0	0	5	7	0	0	0
bifunctional protein acetyl-/propionyl-CoAcarboxylase subunit epsilon AccE [Mycobacterium tuberculosis H37Rv]	NP_217798.1	19 kDa	0	0	0	5	5	0	0	0
PE family protein [Mycobacterium orygis]	QOY47303.1 (+2)	43 kDa	0	0	0	5	3	0	0	0
oxidoreductase [Mycobacterium tuberculosis H37Rv]	NP_216059.1 (+3)	37 kDa	0	0	2	2	4	0	0	0
Cluster of deoxycytidine triphosphate deaminase [Mycobacterium tuberculosis H37Rv] (NP_214835.1)	NP_214835.1 [4]	21 kDa	0	0	0	2	4	0	0	0
ESX-1 transcriptional regulator EspR [Mycobacterium tuberculosis H37Rv]	NP_218366.1 (+3)	15 kDa	0	0	0	2	4	0	0	2
Cluster of PAC2 family protein [Mycobacterium orygis] (QOY47784.1)	QOY47784.1 [4]	36 kDa	0	0	0	2	11	0	0	2
pilin structural subunit Mtp [Mycobacterium tuberculosis]	gnl|extdb|pgaptmp_003522 (+3)	11 kDa	0	0	0	2	1	0	0	0
glutamine-dependent NAD(+) synthetase [Mycobacterium tuberculosis H37Rv]	NP_216954.2 (+3)	75 kDa	0	0	0	2	11	0	0	0
Cluster of aldehyde dehydrogenase AldC [Mycobacterium tuberculosis H37Rv] (NP_217374.1)	NP_217374.1 [4]	48 kDa	0	0	0	2	8	0	0	0
threonine dehydratase IlvA [Mycobacterium tuberculosis H37Rv]	NP_216075.1 (+3)	45 kDa	0	0	0	2	4	0	0	0
Cluster of glycosyl hydrolase [Mycobacterium tuberculosis H37Rv] (NP_217918.1)	NP_217918.1 [4]	87 kDa	0	0	0	2	7	0	3	4
glutamate synthase large subunit [Mycobacterium tuberculosis H37Rv]	NP_218376.1	166 kDa	0	0	0	2	1	0	0	2
monoacyl phosphatidylinositol tetramannoside-binding protein LpqW [Mycobacterium tuberculosis H37Rv]	NP_215682.1 (+3)	66 kDa	0	0	0	2	0	0	0	0
30S ribosomal protein S19 [Mycobacterium tuberculosis H37Rv]	NP_215219.1 (+3)	11 kDa	0	0	0	2	1	0	0	0
lipoprotein LppO [Mycobacterium tuberculosis H37Rv]	NP_216806.1 (+3)	17 kDa	0	0	0	2	3	0	0	0
PPE family protein [Mycobacterium orygis]	QOY48165.1	39 kDa	0	0	0	2	7	0	0	0
methylmalonate-semialdehyde dehydrogenase [Mycobacterium tuberculosis H37Rv]	NP_215267.1 (+2)	54 kDa	0	0	0	2	5	0	0	0
PROBABLE ACETATE KINASE ACKA (ACETOKINASE) [Mycobacterium tuberculosis variant bovis AF2122/97]	CAB5248123.1 (+3)	41 kDa	0	0	0	2	3	0	0	0
50S ribosomal protein L27 [Mycobacterium tuberculosis H37Rv]	NP_216957.1 (+3)	9 kDa	0	0	0	2	0	0	0	0
succinyl-CoA:3-ketoacid-CoA transferase subunit A [Mycobacterium tuberculosis H37Rv]	NP_217020.1 (+3)	26 kDa	0	0	0	2	3	0	3	0
arylamine N-acetyltransferase [Mycobacterium orygis]	QOY48537.1 (+3)	31 kDa	0	0	0	2	4	0	0	0
Cluster of M18 family aminopeptidase [Mycobacterium tuberculosis H37Rv] (NP_215315.1)	NP_215315.1 [4]	46 kDa	0	0	0	2	4	0	3	0
hypothetical protein Rv0603 [Mycobacterium tuberculosis H37Rv]	NP_215117.1 (+2)	10 kDa	0	0	0	2	3	0	0	0
tyrosine--tRNA ligase [Mycobacterium tuberculosis H37Rv]	NP_216205.1 (+3)	46 kDa	0	0	0	2	4	0	0	0
PE family protein [Mycobacterium tuberculosis]	gnl|extdb|pgaptmp_001261 (+3)	31 kDa	0	0	0	2	1	0	0	0
hypothetical protein Rv1887 [Mycobacterium tuberculosis H37Rv]	NP_216403.1 (+3)	40 kDa	0	0	0	2	1	0	0	0
hypothetical protein RJtmp_001713 [Mycobacterium orygis]	QOY50326.1 (+3)	10 kDa	0	0	0	2	3	0	0	0
ribosome-binding factor RbfA [Mycobacterium tuberculosis H37Rv]	NP_217354.1 (+3)	19 kDa	0	2	2	2	1	0	0	4
RNA polymerase-binding protein RbpA [Mycobacterium tuberculosis H37Rv]	NP_216566.1 (+3)	13 kDa	0	2	4	2	3	0	9	4
bifunctional long-chain acyl-CoA synthase/lipase [Mycobacterium tuberculosis H37Rv]	NP_216199.1 (+3)	107 kDa	0	0	0	2	1	0	0	0
hypothetical protein RJtmp_003300 [Mycobacterium orygis]	QOY48219.1 (+2)	7 kDa	0	0	0	2	0	0	0	0
mycothione reductase [Mycobacterium orygis]	QOY47908.1 (+3)	50 kDa	0	0	2	2	1	0	0	0
PE family protein [Mycobacterium tuberculosis]	gnl|extdb|pgaptmp_002477 (+3)	37 kDa	0	0	0	2	3	0	0	0
ribonuclease VapC46 [Mycobacterium tuberculosis H37Rv]	NP_217901.1 (+3)	14 kDa	0	0	0	2	1	0	0	0
hypothetical protein Rv1117 [Mycobacterium tuberculosis H37Rv]	NP_215633.1 (+3)	12 kDa	0	0	0	2	1	0	0	0
GTP cyclohydrolase I [Mycobacterium tuberculosis H37Rv]	NP_218126.1 (+3)	22 kDa	0	2	0	2	1	0	3	2
histidinol-phosphate aminotransferase [Mycobacterium tuberculosis H37Rv]	NP_218289.1	38 kDa	0	0	0	2	1	0	3	0
type I methionyl aminopeptidase [Mycobacterium orygis]	QOY49523.1 (+3)	27 kDa	0	5	4	2	1	0	0	0
PecA family PE domain-processing aspartic protease [Mycobacterium tuberculosis]	gnl|extdb|pgaptmp_002106 (+3)	54 kDa	0	0	0	2	3	0	0	0
Cluster of PROBABLE CONSERVED MCE ASSOCIATED MEMBRANE PROTEIN [Mycobacterium tuberculosis variant bovis AF2122/97] (CAB5247889.1)	CAB5247889.1 [4]	26 kDa	0	0	2	2	4	0	0	0
hypothetical protein Rv1944c [Mycobacterium tuberculosis H37Rv]	NP_216460.1 (+3)	21 kDa	0	0	0	2	1	0	0	0
Cluster of acyl-CoA dehydrogenase [Mycobacterium orygis] (QOY50180.1)	QOY50180.1 [4]	66 kDa	0	2	0	2	3	0	0	0
Rv0340 family IniB-related protein [Mycobacterium tuberculosis]	gnl|extdb|pgaptmp_000360 (+3)	18 kDa	0	0	0	2	3	0	0	0
Cluster of PROBABLE FATTY-ACID-COA LIGASE FADD7 (FATTY-ACID-COA SYNTHETASE) (FATTY-ACID-COA SYNTHASE) [Mycobacterium tuberculosis variant bovis AF2122/97] (CAB5247825.1)	CAB5247825.1 [4]	55 kDa	0	0	0	2	0	0	0	0
antitoxin VapB10 [Mycobacterium tuberculosis H37Rv]	NP_215914.1 (+3)	9 kDa	0	0	0	2	4	0	0	0
transcriptional regulator EmbR [Mycobacterium tuberculosis H37Rv]	NP_215783.1 (+3)	42 kDa	0	0	0	2	10	0	3	0
succinate-semialdehyde dehydrogenase [Mycobacterium tuberculosis H37Rv]	NP_214748.2 (+3)	55 kDa	0	0	0	2	1	0	0	2
hypothetical protein Rv3528c [Mycobacterium tuberculosis H37Rv]	NP_218045.1 (+2)	27 kDa	0	2	0	2	1	0	0	0
acetyl-CoAcarboxylase carboxyl transferase subunit beta [Mycobacterium tuberculosis H37Rv]	NP_215419.1 (+3)	52 kDa	0	0	0	2	3	0	0	0
hypothetical protein Rv0911 [Mycobacterium tuberculosis H37Rv]	NP_215426.1 (+3)	28 kDa	0	0	0	2	1	0	0	0
Excisionase-like protein SCO3328 [Mycobacterium tuberculosis variant bovis AF2122/97]	CAB5248219.1 (+3)	9 kDa	0	2	2	2	3	0	0	0
fatty acid synthase [Mycobacterium tuberculosis H37Rv]	NP_217040.1 (+2)	326 kDa	0	0	0	2	8	0	3	48
DUF3052 domain-containing protein [Mycobacterium orygis]	QOY47372.1 (+1)	15 kDa	0	0	0	2	1	0	0	0
possible trna/rrna methyltransferase [Mycobacterium tuberculosis variant bovis AF2122/97]	SIU02237.1	34 kDa	0	0	0	2	1	0	0	0
enoyl-CoA hydratase EchA14 [Mycobacterium tuberculosis H37Rv]	NP_217002.1 (+3)	26 kDa	0	0	0	2	4	0	0	0
Cluster of POSSIBLE DEHYDROGENASE/REDUCTASE [Mycobacterium tuberculosis variant bovis AF2122/97] (CAB5248044.1)	CAB5248044.1 [4]	41 kDa	0	0	0	2	7	0	0	0
serine/threonine protein kinase PknF [Mycobacterium orygis]	QOY50425.1	51 kDa	0	0	0	2	1	0	0	0
succinate dehydrogenase flavoprotein subunit [Mycobacterium tuberculosis H37Rv]	NP_217835.1 (+3)	65 kDa	0	2	2	2	1	0	0	2
glucosyl-3-phosphoglycerate phosphatase [Mycobacterium tuberculosis H37Rv]	NP_216935.1 (+3)	24 kDa	0	0	0	2	1	0	0	2
Cluster of bifunctional phosphopantothenoylcysteine decarboxylase/phosphopantothenate--cysteine ligase [Mycobacterium tuberculosis H37Rv] (NP_215907.1)	NP_215907.1 [4]	44 kDa	0	0	0	2	11	0	3	2
possible toxin vapc27. contains pin domain [Mycobacterium tuberculosis variant bovis AF2122/97]	CAB5248323.1 (+3)	15 kDa	0	0	0	2	1	0	0	0
hypothetical protein Rv0822c [Mycobacterium tuberculosis H37Rv]	NP_215337.1 (+3)	73 kDa	0	0	0	2	1	0	0	0
PE family protein [Mycobacterium tuberculosis]	gnl|extdb|pgaptmp_001422 (+3)	50 kDa	0	0	0	2	0	0	0	0
FHA domain-containing protein [Mycobacterium orygis]	QOY48798.1	39 kDa	0	0	0	2	3	0	0	0
membrane protein [Mycobacterium tuberculosis H37Rv]	NP_218041.1 (+3)	36 kDa	0	2	0	2	1	0	0	0
lipase [Mycobacterium tuberculosis H37Rv]	NP_215916.1 (+3)	34 kDa	0	0	0	2	3	0	9	4
hypothetical protein Rv1680 [Mycobacterium tuberculosis H37Rv]	NP_216196.1 (+1)	30 kDa	0	0	0	2	3	0	0	0
bifunctional 2-hydroxyhepta-2,4-diene-1,7-dioate isomerase/cyclase/dehydrase [Mycobacterium tuberculosis H37Rv]	NP_215454.1 (+3)	69 kDa	0	0	0	2	1	0	0	0
hypothetical protein Rv2132 [Mycobacterium tuberculosis H37Rv]	NP_216648.1 (+3)	8 kDa	0	0	0	2	1	0	0	0
CONSERVED HYPOTHETICAL PROTEIN [Mycobacterium tuberculosis variant bovis AF2122/97]	CAB5247919.1 (+3)	26 kDa	0	0	0	2	0	0	0	0
hypothetical protein Rv0034 [Mycobacterium tuberculosis H37Rv]	NP_214548.1 (+3)	14 kDa	0	0	0	2	1	0	0	0
hypothetical protein Rv1462 [Mycobacterium tuberculosis H37Rv]	NP_215978.1	43 kDa	0	0	0	2	3	0	0	0
hypothetical protein Rv1261c [Mycobacterium tuberculosis H37Rv]	NP_215777.1 (+3)	17 kDa	0	0	0	2	1	0	0	0
6,7-dimethyl-8-ribityllumazine synthase [Mycobacterium tuberculosis H37Rv]	NP_215932.2 (+2)	16 kDa	0	0	0	2	5	0	3	0
branched-chain keto acid dehydrogenase E1 component subunit beta [Mycobacterium tuberculosis H37Rv]	NP_217012.1 (+3)	38 kDa	0	0	0	2	3	0	0	0
bifunctional UDP-N-acetylglucosamine pyrophosphorylase/glucosamine-1-phosphate N-acetyltransferase [Mycobacterium tuberculosis H37Rv]	NP_215534.1 (+2)	52 kDa	0	0	0	2	8	0	0	0
CRISPR-associated protein Csm6 [Mycobacterium tuberculosis H37Rv]	NP_217334.1	43 kDa	0	0	0	2	1	0	0	0
hypothetical protein Rv0852 [Mycobacterium tuberculosis H37Rv]	NP_215367.2 (+2)	23 kDa	0	0	0	2	3	0	0	0
hypothetical protein Rv0863 [Mycobacterium tuberculosis H37Rv]	NP_215378.2 (+2)	7 kDa	0	0	0	2	0	0	0	0
enoyl-CoA hydratase/isomerase family protein [Mycobacterium orygis]	QOY48372.1 (+2)	31 kDa	0	0	0	2	1	0	0	0
homoserine kinase [Mycobacterium tuberculosis H37Rv]	NP_215812.1 (+3)	32 kDa	0	0	0	0	3	0	6	0
fatty-acid--CoA ligase FadD9 [Mycobacterium tuberculosis H37Rv]	NP_217106.1 (+2)	127 kDa	0	0	0	0	8	0	0	0
Cluster of glycerol kinase GlpK [Mycobacterium orygis] (QOY48648.1)	QOY48648.1 [3]	56 kDa	0	0	0	0	7	0	0	0
POSSIBLE EXPORTED PROTEIN [Mycobacterium tuberculosis variant bovis AF2122/97]	CAB5247915.1 (+3)	14 kDa	0	0	0	0	3	0	0	0
NADH-quinone oxidoreductase subunit E [Mycobacterium tuberculosis H37Rv]	NP_217665.1 (+3)	27 kDa	0	0	0	0	7	0	0	0
Rhodanese-related sulfurtransferase [Mycobacterium tuberculosis variant bovis AF2122/97]	CAB5248101.1 (+3)	15 kDa	0	0	0	0	4	0	0	2
quinolinate synthetase A [Mycobacterium tuberculosis H37Rv]	NP_216110.1 (+3)	37 kDa	0	0	0	0	4	0	0	2
Cluster of deoxyguanosinetriphosphate triphosphohydrolase [Mycobacterium orygis] (QOY47468.1)	QOY47468.1 [4]	47 kDa	0	0	0	0	1	0	0	0
alkyl hydroperoxide reductase AphD [Mycobacterium tuberculosis H37Rv]	NP_216945.1 (+3)	19 kDa	0	0	0	0	3	0	0	0
ENOYL-COA HYDRATASE ECHA2 (ENOYL HYDRASE) (UNSATURATED ACYL-COA HYDRATASE) (CROTONASE) [Mycobacterium tuberculosis variant bovis AF2122/97]	CAB5248170.1 (+3)	33 kDa	0	2	2	0	1	0	0	0
long-chain-fatty-acid--CoA ligase FadD15 [Mycobacterium tuberculosis H37Rv]	NP_216703.1	64 kDa	0	0	0	0	3	0	0	0
Cluster of lipase LipD [Mycobacterium orygis] (QOY50571.1)	QOY50571.1 [2]	47 kDa	0	0	0	0	0	0	0	0
lipoprotein [Mycobacterium tuberculosis H37Rv]	NP_216438.1 (+3)	39 kDa	0	0	0	0	3	0	0	0
Cluster of NADH-quinone oxidoreductase subunit NuoI [Mycobacterium orygis] (QOY48173.1)	QOY48173.1 [4]	23 kDa	0	0	0	0	1	0	0	0
Cluster of TrkA family potassium uptake protein [Mycobacterium orygis] (QOY47766.1)	QOY47766.1 [4]	24 kDa	0	2	2	0	5	0	3	6
histidine phosphatase family protein [Mycobacterium orygis]	QOY50000.1 (+1)	18 kDa	0	0	0	0	4	0	0	2
Cluster of gamma-glutamyltransferase family protein [Mycobacterium orygis] (QOY47507.1)	QOY47507.1 [3]	66 kDa	0	0	2	0	10	0	3	2
RNA pseudouridine synthase [Mycobacterium tuberculosis H37Rv]	NP_216227.1 (+3)	28 kDa	0	0	0	0	4	0	0	2
PROBABLE UROPORPHYRIN-III C-METHYLTRANSFERASE HEMD (UROPORPHYRINOGEN III METHYLASE) (UROGEN III METHYLASE) (SUMT) (UROGEN III METHYLASE) (UROM) [Mycobacterium tuberculosis variant bovis AF2122/97]	CAB5248231.1 (+3)	59 kDa	0	0	0	0	11	0	0	0
thymidine phosphorylase [Mycobacterium tuberculosis H37Rv]	NP_217831.1 (+3)	44 kDa	0	0	0	0	1	0	0	0
HTH-type transcriptional regulator [Mycobacterium tuberculosis H37Rv]	NP_215803.1 (+3)	17 kDa	0	0	0	0	1	0	0	0
hypothetical protein Rv0810c [Mycobacterium tuberculosis H37Rv]	NP_215325.1 (+3)	7 kDa	0	0	0	0	0	0	0	0
Cluster of signal peptide peptidase SppA [Mycobacterium orygis] (QOY49514.1)	QOY49514.1 [4]	63 kDa	0	0	0	0	1	0	0	6
conserved protein [Mycobacterium tuberculosis variant bovis AF2122/97]	CAB5248027.1 (+3)	14 kDa	0	0	0	0	0	0	0	0
hypothetical protein Rv3094c [Mycobacterium tuberculosis H37Rv]	NP_217610.1 (+3)	40 kDa	0	0	0	0	0	0	0	0
hypothetical protein Rv1531 [Mycobacterium tuberculosis H37Rv]	NP_216047.1 (+3)	21 kDa	0	0	0	0	3	0	0	2
Cluster of probable amidohydrolase amib1 (aminohydrolase) [Mycobacterium tuberculosis variant bovis AF2122/97] (SIU01963.1)	SIU01963.1 [4]	41 kDa	0	0	0	0	0	0	0	2
Thioesterase superfamily protein Rv0356c [Mycobacterium tuberculosis variant bovis AF2122/97]	CAB5248068.1 (+3)	23 kDa	0	0	0	0	1	0	0	2
inorganic polyphosphate/ATP-NAD kinase [Mycobacterium tuberculosis H37Rv]	NP_216211.1 (+3)	33 kDa	0	0	0	0	0	0	3	2
hypothetical protein Rv1738 [Mycobacterium tuberculosis H37Rv]	NP_216254.1 (+3)	11 kDa	0	0	0	0	3	0	0	0
peptidylprolyl isomerase PpiB [Mycobacterium orygis]	QOY47673.1 (+1)	31 kDa	0	2	2	0	4	0	0	0
UPF0336 protein [Mycobacterium tuberculosis variant bovis AF2122/97]	CAB5248224.1 (+3)	18 kDa	0	0	0	0	4	0	0	0
transmembrane protein [Mycobacterium tuberculosis H37Rv]	NP_218186.1 (+3)	19 kDa	0	0	0	0	0	0	0	0
3-OXOACYL-[ACYL-CARRIER-PROTEIN] SYNTHASE III FABH (BETA-KETOACYL-ACP SYNTHASE III) (KAS III) [Mycobacterium tuberculosis variant bovis AF2122/97]	CAB5248255.1 (+2)	35 kDa	0	2	0	0	1	0	0	0
cytochrome P450 monooxygenase Cyp142 [Mycobacterium tuberculosis H37Rv]	NP_218035.1 (+1)	44 kDa	0	0	0	0	1	0	0	0
lipoprotein LprE [Mycobacterium tuberculosis H37Rv]	NP_215768.1 (+3)	20 kDa	0	0	0	0	1	0	0	0
PROBABLE CDP-DIACYLGLYCEROL--SERINE O-PHOSPHATIDYLTRANSFERASE PSSA (PS SYNTHASE) (PHOSPHATIDYLSERINE SYNTHASE) [Mycobacterium tuberculosis variant bovis AF2122/97]	CAB5248150.1 (+3)	31 kDa	0	0	0	0	0	0	0	0
lipid-transfer protein [Mycobacterium tuberculosis H37Rv]	NP_217306.3 (+3)	43 kDa	0	0	0	0	5	0	0	0
COGs COG2343 [Mycobacterium tuberculosis variant bovis AF2122/97]	CAB5247850.1 (+3)	14 kDa	0	0	0	0	0	0	0	0
glutamine synthetase [Mycobacterium tuberculosis H37Rv]	NP_217376.1 (+3)	50 kDa	0	0	0	0	5	0	0	0
Cluster of isoleucine--tRNA ligase [Mycobacterium tuberculosis H37Rv] (NP_216052.1)	NP_216052.1 [4]	117 kDa	0	0	0	0	3	0	0	2
hypothetical protein Rv2844 [Mycobacterium tuberculosis H37Rv]	NP_217360.1 (+3)	17 kDa	0	2	2	0	3	0	0	0
resuscitation-promoting factor RpfA [Mycobacterium tuberculosis H37Rv]	NP_215382.1 (+3)	40 kDa	0	2	2	0	0	0	0	0
lipoprotein LpqT [Mycobacterium tuberculosis H37Rv]	NP_215532.1 (+1)	24 kDa	0	0	0	0	5	0	0	0
Cluster of competence damage-inducible protein CinA [Mycobacterium tuberculosis H37Rv] (NP_216417.1)	NP_216417.1 [4]	46 kDa	0	0	0	0	3	0	0	0
Cluster of PROBABLE TRANSCRIPTIONAL REGULATORY PROTEIN [Mycobacterium tuberculosis variant bovis AF2122/97] (CAB5247782.1)	CAB5247782.1 [4]	22 kDa	0	0	0	0	0	0	0	0
glutamyl-tRNA(GLN) amidotransferase subunit C [Mycobacterium tuberculosis H37Rv]	NP_217528.1 (+3)	11 kDa	0	0	0	0	1	0	0	0
NADH-quinone oxidoreductase subunit B [Mycobacterium tuberculosis H37Rv]	NP_217662.1 (+3)	20 kDa	0	0	0	0	1	0	0	0
thiamine-phosphate pyrophosphorylase thie (tmp pyrophosphorylase) (tmp-ppase) (thiamine-phosphate synthase) [Mycobacterium tuberculosis variant bovis AF2122/97]	CAB5248128.1 (+3)	23 kDa	0	0	2	0	0	0	0	0
PROBABLE TRANSCRIPTIONAL REGULATORY PROTEIN (POSSIBLY TETR-FAMILY) [Mycobacterium tuberculosis variant bovis AF2122/97]	CAB5247869.1 (+3)	24 kDa	0	0	0	0	3	0	0	2
Cluster of hypothetical protein Rv1078 [Mycobacterium tuberculosis H37Rv] (NP_215594.1)	NP_215594.1 [4]	25 kDa	0	0	0	0	1	0	0	0
hypothetical protein Rv2843 [Mycobacterium tuberculosis H37Rv]	NP_217359.1 (+3)	18 kDa	0	0	0	0	0	0	0	0
segregation and condensation protein ScpB [Mycobacterium tuberculosis H37Rv]	NP_216226.1 (+3)	25 kDa	0	0	0	0	0	0	3	2
peroxiredoxin [Mycobacterium tuberculosis H37Rv]	NP_216124.1 (+3)	17 kDa	0	0	2	0	3	0	0	0
ribonuclease VapC10 [Mycobacterium tuberculosis H37Rv]	NP_215913.1 (+3)	15 kDa	0	0	0	0	0	0	0	0
MCE-FAMILY PROTEIN MCE1F [Mycobacterium tuberculosis variant bovis AF2122/97]	CAB5247885.1 (+2)	54 kDa	0	0	0	0	1	0	0	0
antitoxin RelB [Mycobacterium tuberculosis H37Rv]	NP_215763.1 (+3)	10 kDa	0	0	0	0	1	0	0	0
hypothetical protein Rv3672c [Mycobacterium tuberculosis H37Rv]	NP_218189.1 (+3)	29 kDa	0	0	0	0	0	0	0	0
enhanced intracellular survival protein [Mycobacterium tuberculosis H37Rv]	NP_216932.2 (+2)	44 kDa	0	0	0	0	3	0	0	0
PROBABLE PHOSPHATE ACETYLTRANSFERASE PTA (PHOSPHOTRANSACETYLASE) [Mycobacterium tuberculosis variant bovis AF2122/97]	CAB5248122.1 (+3)	73 kDa	0	0	0	0	3	0	0	0
PROBABLE AMINOTRANSFERASE [Mycobacterium tuberculosis variant bovis AF2122/97]	CAB5247779.1 (+3)	43 kDa	0	0	0	0	1	0	0	0
hypothetical protein Rv2738c [Mycobacterium tuberculosis H37Rv]	NP_217254.1 (+3)	8 kDa	0	0	0	0	0	0	0	0
GTP-binding translation elongation factor [Mycobacterium tuberculosis H37Rv]	NP_215681.1 (+3)	68 kDa	0	0	0	0	0	0	0	0
carboxylase [Mycobacterium tuberculosis H37Rv]	NP_216238.1 (+3)	55 kDa	0	0	0	0	1	0	0	0
phosphatase [Mycobacterium tuberculosis H37Rv]	NP_217893.1 (+3)	24 kDa	0	0	0	0	0	0	0	0
glyoxalase II [Mycobacterium tuberculosis H37Rv]	NP_215148.1 (+3)	26 kDa	0	0	0	0	1	0	3	0
hypothetical protein RJtmp_001181 [Mycobacterium orygis]	QOY49858.1 (+1)	8 kDa	0	0	0	0	1	0	0	0
Cluster of trehalose-6-phosphate synthase [Mycobacterium orygis] (QOY48469.1)	QOY48469.1 [4]	56 kDa	0	0	0	0	0	0	0	0
phosphoribosylglycinamide formyltransferase 2 [Mycobacterium orygis]	QOY50609.1 (+1)	44 kDa	0	0	0	0	0	0	3	0
POSSIBLE UDP-GLUCOSE 4-EPIMERASE GALE2 (GALACTOWALDENASE) (UDP-GALACTOSE 4-EPIMERASE) (URIDINE DIPHOSPHATE GALACTOSE 4-EPIMERASE) (URIDINE DIPHOSPHO-GALACTOSE 4-EPIMERASE) [Mycobacterium tuberculosis variant bovis AF2122/97]	CAB5248221.1 (+3)	41 kDa	0	0	0	0	0	0	0	0
fatty-acid-amp ligase fadd30 (fatty-acid-amp synthetase) (fatty-acid-amp synthase) [Mycobacterium tuberculosis variant bovis AF2122/97]	CAB5248117.1 (+3)	64 kDa	0	0	0	0	0	0	0	0
acetolactate synthase large subunit [Mycobacterium orygis]	QOY48043.1 (+3)	66 kDa	0	0	0	0	0	0	0	0
phthiocerol/phthiodiolone dimycocerosyl transferase [Mycobacterium tuberculosis H37Rv]	NP_217455.1 (+3)	45 kDa	0	0	0	0	0	0	6	2
carbamoyl-phosphate synthase large subunit [Mycobacterium orygis]	QOY50106.1 (+2)	119 kDa	0	0	0	0	0	0	0	0
ribonuclease J [Mycobacterium tuberculosis H37Rv]	NP_217268.1 (+3)	60 kDa	0	0	0	0	1	0	0	0
50S ribosomal protein L32 [Mycobacterium orygis]	QOY49739.1 (+3)	7 kDa	0	0	0	0	0	0	0	0
histidine--tRNA ligase [Mycobacterium tuberculosis H37Rv]	NP_217096.1 (+3)	45 kDa	0	0	0	0	0	0	0	0
HTH-type transcriptional regulator [Mycobacterium tuberculosis H37Rv]	NP_216072.1 (+3)	22 kDa	0	0	0	0	1	0	0	0
2-C-methyl-D-erythritol 4-phosphate cytidylyltransferase [Mycobacterium tuberculosis H37Rv]	NP_218099.1 (+2)	24 kDa	0	2	0	0	1	0	0	4
SecB-like chaperone [Mycobacterium tuberculosis H37Rv]	NP_216473.1 (+3)	20 kDa	0	0	0	0	0	0	0	0
hypothetical protein RJtmp_002638 [Mycobacterium orygis]	QOY47644.1 (+3)	14 kDa	0	0	0	0	4	0	0	0
unknown protein [Mycobacterium tuberculosis variant bovis AF2122/97]	CAB5247984.1 (+3)	41 kDa	0	0	0	0	5	0	0	0
peptidoglycan biosynthesis protein [Mycobacterium tuberculosis H37Rv]	NP_218427.1 (+3)	124 kDa	0	0	0	0	0	0	0	4
acetaldehyde dehydrogenase [Mycobacterium tuberculosis H37Rv]	NP_218052.1 (+3)	32 kDa	0	0	0	0	4	0	0	0
hydratase [Mycobacterium tuberculosis H37Rv]	NP_218053.1 (+3)	28 kDa	0	0	2	0	3	0	0	4
sulfur carrier protein CysO [Mycobacterium tuberculosis H37Rv]	NP_215851.1 (+3)	10 kDa	0	0	0	0	4	0	3	2
acyl-CoA dehydrogenase FadE22 [Mycobacterium tuberculosis H37Rv]	NP_217577.1 (+2)	77 kDa	0	0	0	0	5	0	0	2
phthioceranic/hydroxyphthioceranic acid synthase [Mycobacterium tuberculosis H37Rv]	NP_218342.1 (+2)	226 kDa	0	0	0	0	0	0	0	0
PROBABLE PEPTIDE SYNTHETASE NRP (PEPTIDE SYNTHASE) [Mycobacterium tuberculosis variant bovis AF2122/97]	CAB5247807.1 (+3)	269 kDa	0	0	0	0	0	0	0	0
copper transporter MctB [Mycobacterium tuberculosis H37Rv]	NP_216214.1 (+3)	32 kDa	0	0	0	0	4	0	0	0
extradiol dioxygenase [Mycobacterium tuberculosis H37Rv]	NP_218085.1 (+3)	34 kDa	0	0	0	0	0	0	0	0
Cluster of LCP family protein [Mycobacterium orygis] (QOY48464.1)	QOY48464.1 [4]	54 kDa	0	0	0	0	1	0	0	0
Mce family protein Mce1C [Mycobacterium tuberculosis H37Rv]	NP_214685.1 (+1)	54 kDa	0	0	0	0	0	0	0	0
3 beta-hydroxysteroid dehydrogenase/delta 5--_4-isomerase [Mycobacterium tuberculosis H37Rv]	NP_215622.1 (+3)	41 kDa	0	0	0	0	1	0	0	0
AsnC family transcriptional regulator [Mycobacterium tuberculosis H37Rv]	NP_217566.1 (+3)	28 kDa	0	0	0	0	1	0	0	2
hypothetical protein Rv1825 [Mycobacterium tuberculosis H37Rv]	NP_216341.1 (+3)	31 kDa	0	0	0	0	0	0	0	0
hypothetical protein Rv2161c [Mycobacterium tuberculosis H37Rv]	NP_216677.1 (+3)	31 kDa	0	0	0	0	4	0	0	0
Cluster of type I polyketide synthase [Mycobacterium orygis] (QOY50677.1)	QOY50677.1 [3]	220 kDa	0	0	0	0	0	0	0	4
Cluster of Probable Rieske iron-sulfur protein QcrA [Mycobacterium tuberculosis variant bovis AF2122/97] (SIU00826.1)	SIU00826.1 [4]	47 kDa	0	0	0	0	0	0	0	0
Cluster of carbonic anhydrase [Mycobacterium orygis] (QOY48281.1)	QOY48281.1 [4]	80 kDa	0	0	0	0	3	0	0	4
Cluster of type VII secretion system ESX-3 AAA family ATPase EccA3 [Mycobacterium orygis] (QOY50603.1)	QOY50603.1 [4]	66 kDa	0	0	0	0	1	0	0	0
Cluster of ESX-3 secretion system protein EccC3 [Mycobacterium tuberculosis H37Rv] (NP_214798.1)	NP_214798.1 [4]	145 kDa	0	0	0	0	0	0	0	0
Cluster of transmembrane protein [Mycobacterium tuberculosis H37Rv] (NP_217709.1)	NP_217709.1 [4]	108 kDa	0	0	0	0	0	0	0	0
Cluster of PROBABLE CONSERVED MEMBRANE PROTEIN [Mycobacterium tuberculosis variant bovis AF2122/97] (CAB5248196.1)	CAB5248196.1 [4]	37 kDa	0	0	0	0	0	0	0	0
Cluster of cytochrome c oxidase subunit II [Mycobacterium orygis] (QOY47333.1)	QOY47333.1 [4]	40 kDa	0	0	0	0	0	0	0	0
Cluster of HAD-IB family hydrolase [Mycobacterium orygis] (QOY47583.1)	QOY47583.1 [4]	62 kDa	0	0	0	0	0	0	0	2
probable aspartyl-trna synthetase asps (aspartate--trna ligase) (asprs) (aspartic acid translase) [Mycobacterium tuberculosis variant bovis AF2122/97]	SIU01220.1	67 kDa	0	0	0	0	0	0	0	2
Cluster of molybdopterin molybdotransferase MoeA [Mycobacterium orygis] (QOY49752.1)	QOY49752.1 [4]	44 kDa	0	0	0	0	0	0	0	0
Cluster of hypothetical protein Rv0647c [Mycobacterium tuberculosis H37Rv] (NP_215161.1)	NP_215161.1 [4]	55 kDa	0	0	0	0	0	0	0	2
Cluster of fatty-acid-amp ligase fadd29 (fatty-acid-amp synthetase) (fatty-acid-amp synthase) [Mycobacterium tuberculosis variant bovis AF2122/97] (SIU01596.1)	SIU01596.1 [2]	67 kDa	0	0	0	0	0	0	0	2
Cluster of ESX-1 secretion-associated protein EspI [Mycobacterium tuberculosis H37Rv] (NP_218393.1)	NP_218393.1 [4]	71 kDa	0	0	0	0	0	0	0	0
Cluster of daunorubicin ABC transporter permease DrrB [Mycobacterium orygis] (QOY47986.1)	QOY47986.1 [4]	36 kDa	0	0	0	0	0	0	0	0
Cluster of chromosomal replication initiator protein DnaA [Mycobacterium tuberculosis H37Rv] (NP_214515.1)	NP_214515.1 [4]	57 kDa	0	0	0	0	0	0	0	0
Cluster of PHENOLPTHIOCEROL SYNTHESIS TYPE-I POLYKETIDE SYNTHASE PPSA [Mycobacterium tuberculosis variant bovis AF2122/97] (SIU01577.1)	SIU01577.1 [2]	199 kDa	0	0	0	0	0	0	0	4
Cluster of probable iron-sulfur-binding reductase [Mycobacterium tuberculosis variant bovis AF2122/97] (CAB5248051.1)	CAB5248051.1 [4]	95 kDa	0	0	0	0	0	0	0	0
Cluster of membrane protein [Mycobacterium tuberculosis H37Rv] (NP_215200.1)	NP_215200.1 [4]	29 kDa	0	0	0	0	0	0	0	0
Cluster of PROBABLE CONSERVED TRANSMEMBRANE PROTEIN [Mycobacterium tuberculosis variant bovis AF2122/97] (CAB5247891.1)	CAB5247891.1 [4]	48 kDa	0	0	0	0	0	0	0	0
Cluster of ESX-3 secretion system protein EccE [Mycobacterium tuberculosis H37Rv] (NP_214806.1)	NP_214806.1 [4]	36 kDa	0	0	0	0	0	0	0	0
Cluster of phosphotyrosine protein phosphatase [Mycobacterium tuberculosis H37Rv] (NP_214667.1)	NP_214667.1 [4]	30 kDa	0	0	0	0	0	0	0	2
Cluster of adenine phosphoribosyltransferase [Mycobacterium orygis] (QOY47675.1)	QOY47675.1 [4]	23 kDa	0	0	0	0	0	0	0	0
NAD(P)H nitroreductase [Mycobacterium tuberculosis H37Rv]	NP_217647.3 (+3)	36 kDa	0	0	0	0	4	0	0	0
Cluster of type I polyketide synthase [Mycobacterium tuberculosis] (gnl|extdb|pgaptmp_002181)	gnl|extdb|pgaptmp_002181 [2]	432 kDa	0	0	0	0	0	0	0	0
Cluster of FAD-dependent oxidoreductase [Mycobacterium orygis] (QOY50430.1)	QOY50430.1 [3]	45 kDa	0	0	0	0	0	0	0	0
Cluster of hypothetical protein RJtmp_002378 [Mycobacterium orygis] (QOY47428.1)	QOY47428.1 [4]	46 kDa	0	0	0	0	1	0	0	0
Cluster of cell wall synthesis protein CwsA [Mycobacterium orygis] (QOY48861.1)	QOY48861.1 [4]	16 kDa	0	0	0	0	0	0	0	0
Cluster of hypothetical protein Rv1919c [Mycobacterium tuberculosis H37Rv] (NP_216435.1)	NP_216435.1 [4]	17 kDa	0	0	0	0	3	0	0	0
Cluster of hypothetical protein Rv0825c [Mycobacterium tuberculosis H37Rv] (NP_215340.1)	NP_215340.1 [4]	23 kDa	0	0	0	0	0	0	0	0
Cluster of isoniazid-induced protein IniA [Mycobacterium orygis] (QOY49162.1)	QOY49162.1 [2]	67 kDa	0	0	0	0	0	0	0	0
Cluster of acyl-CoA dehydrogenase family protein [Mycobacterium orygis] (QOY49049.1)	QOY49049.1 [3]	42 kDa	0	0	0	0	0	0	0	0
Cluster of aldehyde dehydrogenase family protein [Mycobacterium orygis] (QOY48301.1)	QOY48301.1 [4]	51 kDa	0	0	0	0	3	0	0	2
cholesterol oxidase [Mycobacterium tuberculosis H37Rv]	NP_217926.1 (+3)	63 kDa	0	0	0	0	0	0	0	0
Cluster of chromosome partition protein Smc [Mycobacterium tuberculosis H37Rv] (NP_217438.2)	NP_217438.2 [3]	131 kDa	0	0	0	0	0	0	0	0
Cluster of PROBABLE CONSERVED LIPOPROTEIN LPQO [Mycobacterium tuberculosis variant bovis AF2122/97] (CAB5248329.1)	CAB5248329.1 [4]	33 kDa	0	0	0	0	3	0	0	0
Cluster of POSSIBLE CONSERVED MEMBRANE PROTEIN [Mycobacterium tuberculosis variant bovis AF2122/97] (CAB5248126.1)	CAB5248126.1 [4]	47 kDa	0	0	0	0	0	0	0	0
Cluster of PROBABLE CONSERVED MCE ASSOCIATED TRANSMEMBRANE PROTEIN [Mycobacterium tuberculosis variant bovis AF2122/97] (CAB5247887.1)	CAB5247887.1 [4]	35 kDa	0	0	0	0	0	0	0	0
Cluster of phosphate ABC transporter ATP-binding protein PhoT [Mycobacterium tuberculosis H37Rv] (NP_215335.1)	NP_215335.1 [4]	28 kDa	0	0	0	0	0	0	0	0
Cluster of PROBABLE HELICASE HELZ [Mycobacterium tuberculosis variant bovis AF2122/97] (SIU00734.1)	SIU00734.1 [2]	112 kDa	0	0	0	0	0	0	0	0
Cluster of hypothetical protein Rv3272 [Mycobacterium tuberculosis H37Rv] (NP_217789.1)	NP_217789.1 [4]	42 kDa	0	0	0	0	0	0	0	0
Cluster of redox-regulated ATPase YchF [Mycobacterium orygis] (QOY49850.1)	QOY49850.1 [4]	38 kDa	0	0	0	0	0	0	0	0
Cluster of oxidoreductase [Mycobacterium tuberculosis H37Rv] (NP_214582.1)	NP_214582.1 [3]	32 kDa	0	0	0	0	0	0	0	0
Cluster of UTP--glucose-1-phosphate uridylyltransferase [Mycobacterium orygis] (QOY49751.1)	QOY49751.1 [4]	32 kDa	0	0	0	0	3	0	0	0
Cluster of PROBABLE NAD(P) TRANSHYDROGENASE (SUBUNIT BETA) PNTB [INTEGRAL MEMBRANE PROTEIN] (PYRIDINE NUCLEOTIDE TRANSHYDROGENASE SUBUNIT BETA) (NICOTINAMIDE NUCLEOTIDE TRANSHYDROGENASE SUBUNIT BETA) [Mycobacterium tuberculosis variant bovis AF2122/97] (CAB5247867.1)	CAB5247867.1 [4]	49 kDa	0	0	0	0	0	0	0	0
Cluster of multidrug efflux ABC transporter ATP-binding protein [Mycobacterium orygis] (QOY49943.1)	QOY49943.1 [4]	33 kDa	0	0	0	0	0	0	0	0
Cluster of two-component system sensor histidine kinase DosT [Mycobacterium orygis] (QOY47185.1)	QOY47185.1 [4]	62 kDa	0	0	0	0	0	0	0	0
Cluster of Si-specific NAD(P)(+) transhydrogenase [Mycobacterium orygis] (QOY50779.1)	QOY50779.1 [4]	51 kDa	0	0	0	0	0	0	0	0
Cluster of hypothetical protein Rv2689c [Mycobacterium tuberculosis H37Rv] (NP_217205.1)	NP_217205.1 [4]	43 kDa	0	0	0	0	0	0	0	0
Cluster of penicillin-binding protein PbpA [Mycobacterium tuberculosis H37Rv] (NP_214530.1)	NP_214530.1 [4]	52 kDa	0	0	0	0	0	0	0	0
Cluster of APC family permease [Mycobacterium orygis] (QOY47764.1)	QOY47764.1 [4]	72 kDa	0	0	0	0	0	0	0	0
Cluster of hypothetical protein Rv3683 [Mycobacterium tuberculosis H37Rv] (NP_218200.1)	NP_218200.1 [4]	34 kDa	0	0	0	0	0	0	0	0
Cluster of hypothetical protein Rv2751 [Mycobacterium tuberculosis H37Rv] (NP_217267.1)	NP_217267.1 [4]	34 kDa	0	0	0	0	0	0	0	0
Cluster of PROBABLE FATTY-ACID-CoA LIGASE FADD5 (FATTY-ACID-CoA SYNTHETASE) (FATTY-ACID-CoA SYNTHASE) [Mycobacterium tuberculosis variant bovis AF2122/97] (CAB5247877.1)	CAB5247877.1 [4]	60 kDa	0	0	0	0	0	0	0	0
Cluster of wax ester/triacylglycerol synthase family O-acyltransferase [Mycobacterium orygis] (QOY48123.1)	QOY48123.1 [4]	53 kDa	0	0	0	0	0	0	0	0
Cluster of GNAT family N-acetyltransferase [Mycobacterium orygis] (QOY48240.1)	QOY48240.1 [4]	51 kDa	0	0	0	0	0	0	0	0
Cluster of Carbon monoxide oxidation accessory protein CoxD [Mycobacterium tuberculosis variant bovis AF2122/97] (SIU01065.1)	SIU01065.1 [4]	32 kDa	0	0	0	0	0	0	0	0
alpha-methylacyl-CoA racemase [Mycobacterium tuberculosis H37Rv]	NP_215659.1 (+3)	39 kDa	0	5	0	0	3	0	0	0
Cluster of monooxygenase [Mycobacterium tuberculosis H37Rv] (NP_216049.1)	NP_216049.1 [4]	40 kDa	0	0	0	0	1	0	0	0
ADENYLYL CYCLASE (ATP PYROPHOSPHATE-LYASE) (ADENYLATE CYCLASE) [Mycobacterium tuberculosis variant bovis AF2122/97]	SIT99896.1	42 kDa	0	0	0	0	0	0	0	0
Cluster of neutral/alkaline ceramidase [Mycobacterium orygis] (QOY49463.1)	QOY49463.1 [4]	69 kDa	0	0	0	0	0	0	0	0
Cluster of DNA integrity scanning protein DisA [Mycobacterium tuberculosis variant bovis AF2122/97] (SIU02244.1)	SIU02244.1 [2]	39 kDa	0	0	0	0	0	0	0	0
short-chain type dehydrogenase [Mycobacterium tuberculosis H37Rv]	NP_216381.1 (+3)	30 kDa	0	0	0	0	0	0	0	0
Cluster of lignin peroxidase LipJ [Mycobacterium tuberculosis H37Rv] (NP_216416.1)	NP_216416.1 [3]	50 kDa	0	0	0	0	1	0	0	0
Cluster of MCE-FAMILY PROTEIN MCE1A [Mycobacterium tuberculosis variant bovis AF2122/97] (CAB5247880.1)	CAB5247880.1 [4]	48 kDa	0	0	0	0	0	0	0	0
Cluster of NAD(P)H-hydrate dehydratase [Mycobacterium orygis] (QOY48425.1)	QOY48425.1 [4]	47 kDa	0	0	0	0	0	0	0	0
Cluster of succinate dehydrogenase iron-sulphur protein subunit [Mycobacterium tuberculosis H37Rv] (NP_217836.1)	NP_217836.1 [4]	29 kDa	0	0	0	0	0	0	0	0
Cluster of ATP-binding cassette domain-containing protein [Mycobacterium orygis] (QOY48923.1)	QOY48923.1 [3]	36 kDa	0	0	0	0	0	0	0	0
Cluster of ECF RNA polymerase sigma factor SigJ [Mycobacterium tuberculosis H37Rv] (NP_217845.1)	NP_217845.1 [4]	34 kDa	0	0	0	0	0	0	0	0
Cluster of UDP-N-acetylglucosamine--N-acetylmuramyl-(pentapeptide) pyrophosphoryl-undecaprenol-N-acetylglucosamine transferase [Mycobacterium tuberculosis H37Rv] (NP_216669.1)	NP_216669.1 [4]	42 kDa	0	0	0	0	0	0	0	0
Cluster of vitamin B12 ABC transporter ATP-binding protein BacA [Mycobacterium orygis] (QOY50474.1)	QOY50474.1 [4]	71 kDa	0	0	0	0	0	0	0	0
sulfate ABC transporter ATP-binding protein [Mycobacterium orygis]	QOY47510.1 (+3)	37 kDa	0	0	0	0	0	0	0	0
Cluster of DUF3060 domain-containing protein [Mycobacterium orygis] (QOY49138.1)	QOY49138.1 [3]	21 kDa	0	0	0	0	0	0	0	0
Cluster of succinyldiaminopimelate transaminase [Mycobacterium orygis] (QOY49909.1)	QOY49909.1 [2]	38 kDa	0	0	0	0	1	0	0	0
Cluster of adenylate/guanylate cyclase domain-containing protein [Mycobacterium orygis] (QOY48602.1)	QOY48602.1 [4]	59 kDa	0	0	0	0	0	0	0	0
Cluster of 5'-3' exonuclease [Mycobacterium tuberculosis H37Rv] (NP_216606.1)	NP_216606.1 [2]	42 kDa	0	0	0	0	0	0	0	0
hypothetical protein Rv1097c [Mycobacterium tuberculosis H37Rv]	NP_215613.1 (+3)	30 kDa	0	0	0	0	0	0	0	0
Cluster of alpha/beta fold hydrolase [Mycobacterium orygis] (QOY50604.1)	QOY50604.1 [4]	44 kDa	0	0	0	0	0	0	0	0
Cluster of CaiB/BaiF family protein [Mycobacterium tuberculosis variant bovis AF2122/97] (SIU00501.1)	SIU00501.1 [4]	83 kDa	0	0	0	0	1	0	0	0
Cluster of hypothetical protein RJtmp_004024 [Mycobacterium orygis] (QOY48837.1)	QOY48837.1 [3]	84 kDa	0	0	0	0	0	0	0	0
Cluster of transcriptional regulator LrpA [Mycobacterium tuberculosis H37Rv] (NP_217808.1)	NP_217808.1 [4]	17 kDa	0	0	0	0	0	0	3	2
Cluster of acyl-CoA dehydrogenase FadE27 [Mycobacterium tuberculosis H37Rv] (NP_218022.1)	NP_218022.1 [4]	39 kDa	0	0	0	0	1	0	0	0
Cluster of cytochrome P450 Cyp126 [Mycobacterium tuberculosis H37Rv] (NP_215292.1)	NP_215292.1 [4]	46 kDa	0	0	2	0	0	0	0	4
Cluster of CONSERVED HYPOTHETICAL PROTEIN [Mycobacterium tuberculosis variant bovis AF2122/97] (CAB5248148.1)	CAB5248148.1 [4]	24 kDa	0	0	4	0	0	0	0	0
hypothetical protein Rv1148c [Mycobacterium tuberculosis H37Rv]	NP_215664.1 (+3)	53 kDa	0	0	0	0	1	0	0	0
Cluster of hypothetical protein Rv1842c [Mycobacterium tuberculosis H37Rv] (NP_216358.1)	NP_216358.1 [4]	48 kDa	0	0	0	0	0	0	0	0
Cluster of SDR family oxidoreductase [Mycobacterium orygis] (QOY49557.1)	QOY49557.1 [2]	26 kDa	0	0	0	0	1	0	0	0
pyridoxal-phosphate-dependent protein EgtE [Mycobacterium tuberculosis H37Rv]	NP_218217.1 (+2)	40 kDa	0	0	0	0	0	0	0	0
Cluster of SulP family inorganic anion transporter [Mycobacterium orygis] (QOY50388.1)	QOY50388.1 [3]	51 kDa	0	0	0	0	0	0	0	0
Phosphoribosyl transferase domain protein [Mycobacterium tuberculosis variant bovis AF2122/97]	CAB5248294.1 (+3)	47 kDa	0	0	0	0	1	0	0	0
Cluster of hypothetical protein Rv0493c [Mycobacterium tuberculosis H37Rv] (NP_215007.1)	NP_215007.1 [2]	35 kDa	0	0	0	0	0	0	0	0
Cluster of PROBABLE THIAMIN BIOSYNTHESIS PROTEIN THIG (THIAZOLE BIOSYNTHESIS PROTEIN) [Mycobacterium tuberculosis variant bovis AF2122/97] (CAB5248131.1)	CAB5248131.1 [4]	26 kDa	0	0	0	0	0	0	0	0
serine/threonine-protein kinase PknK [Mycobacterium tuberculosis H37Rv]	NP_217596.1 (+3)	119 kDa	0	0	0	0	0	0	0	0
Cluster of hypothetical protein Rv2001 [Mycobacterium tuberculosis H37Rv] (NP_216517.1)	NP_216517.1 [3]	29 kDa	0	0	0	0	0	0	0	0
PROBABLE OROTATE PHOSPHORIBOSYLTRANSFERASE PYRE (OPRT) (OPRTASE) [Mycobacterium tuberculosis variant bovis AF2122/97]	CAB5248094.1 (+3)	19 kDa	0	0	0	0	0	0	0	0
cation transporter p-type atpase a ctpa [Mycobacterium tuberculosis variant bovis AF2122/97]	CAB5247798.1 (+3)	79 kDa	0	0	0	0	0	0	0	0
Cluster of FAD-containing monooxygenase MymA [Mycobacterium tuberculosis H37Rv] (NP_217599.1)	NP_217599.1 [4]	55 kDa	0	0	0	0	0	0	0	0
hypothetical protein Rv2327 [Mycobacterium tuberculosis H37Rv]	NP_216843.1 (+3)	17 kDa	0	0	0	0	1	0	0	2
Cluster of octanoyltransferase [Mycobacterium tuberculosis H37Rv] (NP_216733.1)	NP_216733.1 [4]	24 kDa	0	0	0	0	0	0	0	0
Cluster of transmembrane protein [Mycobacterium tuberculosis H37Rv] (NP_217795.1)	NP_217795.1 [4]	20 kDa	0	0	0	0	0	0	0	0
Cluster of acetate metabolism transcriptional regulator RamB [Mycobacterium orygis] (QOY49273.1)	QOY49273.1 [3]	53 kDa	0	0	0	0	0	0	0	0
Cluster of imidazole glycerol phosphate synthase subunit HisH [Mycobacterium orygis] (QOY50294.1)	QOY50294.1 [4]	21 kDa	0	2	2	0	0	0	0	0
Cluster of unknown protein [Mycobacterium tuberculosis variant bovis AF2122/97] (CAB5248025.1)	CAB5248025.1 [4]	45 kDa	0	0	0	0	1	0	0	0
TetR family transcriptional regulator [Mycobacterium tuberculosis H37Rv]	NP_217676.1 (+3)	23 kDa	0	0	0	0	1	0	0	0
Cluster of hypothetical protein RJtmp_001569 [Mycobacterium orygis] (QOY50200.1)	QOY50200.1 [4]	30 kDa	0	0	0	0	0	0	0	0
Cluster of acyltransferase family protein [Mycobacterium orygis] (QOY50568.1)	QOY50568.1 [4]	32 kDa	0	0	0	0	0	0	0	0
Cluster of GCN5-like N-acetyltransferase [Mycobacterium tuberculosis H37Rv] (NP_214647.1)	NP_214647.1 [4]	23 kDa	0	0	0	0	0	0	0	0
Cluster of trehalose-2-sulfate acyltransferase [Mycobacterium orygis] (QOY48759.1)	QOY48759.1 [4]	52 kDa	0	0	0	0	0	0	0	0
hypothetical protein Rv2743c [Mycobacterium tuberculosis H37Rv]	NP_217259.1 (+3)	29 kDa	0	0	0	0	0	0	0	0
Cluster of acyl-CoA dehydrogenase FadE13 [Mycobacterium tuberculosis H37Rv] (NP_215490.1)	NP_215490.1 [3]	41 kDa	0	0	0	0	0	0	0	0
Cluster of phage capsid protein [Mycobacterium tuberculosis H37Rv] (NP_216092.1)	NP_216092.1 [3]	50 kDa	0	0	0	0	0	0	0	0
Cluster of ABC transporter ATP-binding protein [Mycobacterium orygis] (QOY49746.1)	QOY49746.1 [4]	27 kDa	0	0	0	0	0	0	0	0
Cluster of vitamin B12-dependent ribonucleoside-diphosphate reductase [Mycobacterium tuberculosis H37Rv] (NP_215084.1)	NP_215084.1 [4]	75 kDa	0	0	0	0	0	0	0	0
precorrin-8X methylmutase [Mycobacterium tuberculosis H37Rv]	NP_216581.1 (+3)	22 kDa	0	0	0	0	0	0	0	0
Cluster of DUF2510 domain-containing protein [Mycobacterium orygis] (QOY48428.1)	QOY48428.1 [2]	18 kDa	0	0	0	0	0	0	0	0
Cluster of Vegetative cell wall protein gp1 precursor [Mycobacterium tuberculosis variant bovis AF2122/97] (SIU00715.1)	SIU00715.1 [2]	74 kDa	0	0	0	0	0	0	0	0
hypothetical protein Rv2297 [Mycobacterium tuberculosis H37Rv]	NP_216813.1 (+3)	16 kDa	0	0	0	0	0	0	0	0
Cluster of DUF501 domain-containing protein [Mycobacterium orygis] (QOY49778.1)	QOY49778.1 [4]	18 kDa	0	0	0	0	0	0	0	0
Cluster of PROBABLE NADH DEHYDROGENASE I (CHAIN M) NUOK (NADH-UBIQUINONE OXIDOREDUCTASE CHAIN M) [Mycobacterium tuberculosis variant bovis AF2122/97] (SIU01808.1)	SIU01808.1 [4]	59 kDa	0	0	0	0	0	0	0	0
Cluster of conserved integral membrane protein yrbe1a [Mycobacterium tuberculosis variant bovis AF2122/97] (CAB5247878.1)	CAB5247878.1 [8]	28 kDa	0	0	0	0	0	0	0	0
Cluster of SDR family oxidoreductase [Mycobacterium orygis] (QOY48530.1)	QOY48530.1 [4]	27 kDa	0	0	0	0	0	0	0	0
Cluster of hypothetical protein Rv3282 [Mycobacterium tuberculosis H37Rv] (NP_217799.1)	NP_217799.1 [4]	23 kDa	0	0	0	0	1	0	0	0
arginine/hypothetical protein [Mycobacterium tuberculosis H37Rv]	NP_217318.1 (+3)	39 kDa	0	0	0	0	0	0	0	0
Cluster of hypothetical protein Rv1592c [Mycobacterium tuberculosis H37Rv] (NP_216108.1)	NP_216108.1 [4]	48 kDa	0	0	0	0	0	0	0	0
Cluster of PPOX class F420-dependent oxidoreductase [Mycobacterium orygis] (QOY48035.1)	QOY48035.1 [4]	18 kDa	0	0	0	0	1	0	0	0
Cluster of PROBABLE ACYL-COA DEHYDROGENASE FADE32 [Mycobacterium tuberculosis variant bovis AF2122/97] (SIU02220.1)	SIU02220.1 [4]	33 kDa	0	0	0	0	1	0	0	0
Cluster of sensor domain-containing protein [Mycobacterium orygis] (QOY48548.1)	QOY48548.1 [4]	25 kDa	0	0	0	0	0	0	0	0
Cluster of glycosyltransferase [Mycobacterium tuberculosis H37Rv] (NP_216040.1)	NP_216040.1 [8]	44 kDa	0	0	0	0	0	0	0	0
Cluster of PROBABLE METHYLTRANSFERASE/METHYLASE [Mycobacterium tuberculosis variant bovis AF2122/97] (CAB5248290.1)	CAB5248290.1 [4]	37 kDa	0	0	0	0	0	0	0	0
Cluster of DUF402 domain-containing protein [Mycobacterium orygis] (QOY50320.1)	QOY50320.1 [4]	17 kDa	0	0	0	0	0	0	0	0
Cluster of lipoprotein LppR [Mycobacterium tuberculosis H37Rv] (NP_216919.1)	NP_216919.1 [4]	26 kDa	0	0	0	0	0	0	0	0
CRISPR type III-associated RAMP protein Csm3 [Mycobacterium tuberculosis H37Rv]	NP_217337.1 (+3)	26 kDa	0	0	0	0	0	0	0	0
Cluster of DUF881 domain-containing protein [Mycobacterium orygis] (QOY48865.1)	QOY48865.1 [2]	27 kDa	0	0	0	0	0	0	0	0
Cluster of hypothetical protein Rv3071 [Mycobacterium tuberculosis H37Rv] (NP_217587.1)	NP_217587.1 [4]	40 kDa	0	0	0	0	0	0	0	0
Cluster of ESX-2 type VII secretion system protein EccC [Mycobacterium tuberculosis H37Rv] (NP_218411.1)	NP_218411.1 [4]	154 kDa	0	0	0	0	0	0	0	0
Cluster of Possible antitoxin VapB1 [Mycobacterium tuberculosis variant bovis AF2122/97] (SIT98441.1)	SIT98441.1 [4]	9 kDa	0	0	0	0	0	0	0	0
Cluster of hypothetical protein RJtmp_002418 [Mycobacterium orygis] (QOY47464.1)	QOY47464.1 [4]	41 kDa	0	0	0	0	0	0	0	0
hypothetical protein Rv2253 [Mycobacterium tuberculosis H37Rv]	NP_216769.1 (+3)	18 kDa	0	2	2	0	4	0	0	0
Cluster of CONSERVED HYPOTHETICAL PROTEIN [Mycobacterium tuberculosis variant bovis AF2122/97] (SIT98377.1)	SIT98377.1 [3]	49 kDa	0	0	0	0	0	0	0	0
Cluster of amino acid permease [Mycobacterium orygis] (QOY47270.1)	QOY47270.1 [4]	53 kDa	0	0	0	0	0	0	0	0
Cluster of membrane protein insertion efficiency factor [Mycobacterium tuberculosis H37Rv] (NP_218439.1)	NP_218439.1 [4]	13 kDa	0	0	0	0	0	0	0	0
SsrA-binding protein [Mycobacterium tuberculosis H37Rv]	NP_217616.1 (+3)	18 kDa	0	0	0	0	0	0	0	0
Cluster of ribonuclease VapC3 [Mycobacterium tuberculosis H37Rv] (NP_215063.1)	NP_215063.1 [3]	15 kDa	0	0	0	0	1	0	0	0
PROBABLE PREPROTEIN TRANSLOCASE SECA1 1 SUBUNIT [Mycobacterium tuberculosis variant bovis AF2122/97]	SIU01897.1 (+2)	106 kDa	0	0	2	0	0	0	0	4
manganese/zinc-exporting P-type ATPase [Mycobacterium tuberculosis H37Rv]	NP_217787.1 (+3)	76 kDa	0	0	0	0	0	0	0	0
30S ribosomal protein S8 [Mycobacterium tuberculosis H37Rv]	NP_215232.1 (+3)	14 kDa	0	0	0	0	1	0	0	0
trans-acting enoyl reductase [Mycobacterium tuberculosis H37Rv]	NP_217469.1 (+3)	45 kDa	0	0	0	0	0	0	0	0
proteasome-associated ATPase [Mycobacterium tuberculosis H37Rv]	NP_216631.1 (+3)	67 kDa	0	0	0	0	0	0	0	2
serine/threonine-protein kinase PknB [Mycobacterium tuberculosis H37Rv]	NP_214528.1 (+3)	67 kDa	0	0	0	0	1	0	0	4
proteasome accessory factor PafA [Mycobacterium tuberculosis H37Rv]	NP_216613.1 (+3)	51 kDa	0	0	0	0	0	0	0	2
probable dehydrogenase/reductase [Mycobacterium tuberculosis variant bovis AF2122/97]	CAB5248153.1 (+3)	34 kDa	0	0	0	0	0	0	0	0
type VII secretion system ESX-5 FtsK/SpoIIIE family ATPase EccC5 [Mycobacterium orygis]	QOY50450.1 (+3)	153 kDa	0	0	0	0	0	0	0	2
phthiocerol synthesis polyketide synthase type I PpsC [Mycobacterium tuberculosis H37Rv]	NP_217449.1 (+3)	231 kDa	0	0	0	0	0	0	0	4
ketoacyl reductase [Mycobacterium tuberculosis H37Rv]	NP_216060.1 (+3)	28 kDa	0	0	0	0	1	0	3	0
phthiodiolone/phenolphthiodiolone dimycocerosates ketoreductase [Mycobacterium tuberculosis H37Rv]	NP_217467.1 (+3)	41 kDa	0	0	0	0	1	0	0	4
excinuclease ABC subunit UvrA [Mycobacterium tuberculosis H37Rv]	NP_216154.1 (+3)	106 kDa	0	0	0	0	0	0	0	2
pyruvate carboxylase [Mycobacterium tuberculosis H37Rv]	NP_217483.1 (+3)	120 kDa	0	0	0	0	0	0	0	6
fatty-acid--CoA ligase FadD21 [Mycobacterium tuberculosis H37Rv]	NP_215701.1 (+3)	63 kDa	0	0	0	0	0	0	0	0
oxidoreductase EphD [Mycobacterium tuberculosis H37Rv]	NP_216730.1 (+3)	64 kDa	0	0	0	0	0	0	0	0
DNA polymerase III subunit gamma/tau [Mycobacterium tuberculosis H37Rv]	NP_218238.1 (+3)	62 kDa	0	0	0	0	0	0	0	0
apolipoprotein N-acyltransferase [Mycobacterium orygis]	QOY50726.1	94 kDa	0	0	0	0	0	0	0	0
short-chain type dehydrogenase/reductase [Mycobacterium tuberculosis H37Rv]	NP_217025.1 (+3)	28 kDa	0	0	0	0	0	0	0	0
ATP-dependent CLP protease ATP-binding subunit ClpX [Mycobacterium tuberculosis H37Rv]	NP_216973.1 (+3)	47 kDa	0	0	0	0	0	0	0	0
ESX-1 secretion system protein EccCb [Mycobacterium tuberculosis H37Rv]	NP_218388.1 (+3)	65 kDa	0	0	0	0	0	0	0	0
hypothetical protein Rv0798c [Mycobacterium tuberculosis H37Rv]	NP_215313.1 (+3)	29 kDa	0	0	0	0	0	0	0	2
type VII secretion system ESX-1 FtsK/SpoIIIE family ATPase EccCa1 [Mycobacterium orygis]	QOY48805.1	81 kDa	0	0	0	0	0	0	0	0
esx conserved component eccb3. esx-3 type vii secretion system protein. possible membrane protein [Mycobacterium tuberculosis variant bovis AF2122/97]	CAB5247997.1 (+3)	56 kDa	0	0	0	0	3	0	0	0
cell division ATP-binding protein FtsE [Mycobacterium tuberculosis H37Rv]	NP_217618.1 (+3)	26 kDa	0	2	0	0	0	0	3	0
ubiquinol-cytochrome C reductase cytochrome subunit B [Mycobacterium tuberculosis H37Rv]	NP_216712.1 (+3)	61 kDa	0	0	0	0	0	0	0	0
trans-acting enoyl reductase [Mycobacterium tuberculosis H37Rv]	NP_216965.1 (+3)	44 kDa	0	0	0	0	0	0	0	0
wax ester/triacylglycerol synthase family O-acyltransferase [Mycobacterium orygis]	QOY48248.1 (+2)	51 kDa	0	0	0	0	0	0	0	0
histone-like protein Hns [Mycobacterium tuberculosis H37Rv]	NP_218369.1 (+3)	14 kDa	0	0	0	0	1	0	0	8
dTDP-glucose 4,6-dehydratase [Mycobacterium tuberculosis H37Rv]	NP_217981.1 (+3)	38 kDa	0	0	0	0	4	0	0	0
glucose-6-phosphate 1-dehydrogenase [Mycobacterium tuberculosis H37Rv]	NP_215963.1 (+3)	57 kDa	0	0	0	0	0	0	0	0
hypothetical protein Rv3038c [Mycobacterium tuberculosis H37Rv]	NP_217554.1 (+3)	36 kDa	0	0	0	0	0	0	0	0
ArsA family ATPase [Mycobacterium tuberculosis]	gnl|extdb|pgaptmp_003900	42 kDa	0	0	0	0	0	0	0	0
Trehalase (EC [Mycobacterium tuberculosis variant bovis AF2122/97]	SIU01040.1 (+1)	78 kDa	0	0	0	0	7	0	0	2
cytochrome P450 Cyp140 [Mycobacterium tuberculosis H37Rv]	NP_216396.3 (+3)	49 kDa	0	0	0	0	0	0	0	0
zinc metalloprotease FtsH [Mycobacterium tuberculosis H37Rv]	NP_218127.1 (+3)	82 kDa	0	0	0	0	1	0	0	0
ATP synthase subunit B [Mycobacterium tuberculosis H37Rv]	NP_215822.1 (+3)	18 kDa	0	0	0	0	0	0	0	2
hypothetical protein Rv1191 [Mycobacterium tuberculosis H37Rv]	NP_215707.1 (+3)	33 kDa	0	0	0	0	0	0	0	0
long-chain fatty acid--CoA ligase [Mycobacterium orygis]	QOY50260.1 (+1)	66 kDa	0	0	0	0	0	0	0	0
multiple resistance/pH adaptation protein [Mycobacterium tuberculosis H37Rv]	NP_215745.1 (+3)	41 kDa	0	0	0	0	0	0	0	2
PROBABLE CONSERVED MEMBRANE PROTEIN [Mycobacterium tuberculosis variant bovis AF2122/97]	CAB5248073.1 (+3)	30 kDa	0	0	2	0	0	0	0	0
hypothetical protein Rv1461 [Mycobacterium tuberculosis H37Rv]	NP_215977.1 (+3)	94 kDa	0	0	0	0	0	0	0	0
acyl-coa dehydrogenase fade7 [Mycobacterium tuberculosis variant bovis AF2122/97]	CAB5248112.1 (+3)	42 kDa	0	0	0	0	3	0	0	0
monooxygenase EthA [Mycobacterium tuberculosis H37Rv]	NP_218371.1 (+3)	55 kDa	0	0	0	0	0	0	0	0
phthiotriol/phenolphthiotriol dimycocerosates methyltransferase [Mycobacterium tuberculosis H37Rv]	NP_217468.1 (+3)	31 kDa	0	0	0	0	0	0	0	0
arabinosyltransferase A [Mycobacterium tuberculosis H37Rv]	NP_218311.1 (+3)	116 kDa	0	0	0	0	0	0	0	0
epimerase family protein [Mycobacterium tuberculosis H37Rv]	NP_216732.1 (+3)	32 kDa	0	0	0	0	1	0	3	2
prephenate dehydratase [Mycobacterium tuberculosis H37Rv]	NP_218355.1 (+3)	34 kDa	0	0	0	0	1	0	0	0
PROBABLE GLYCEROL-3-PHOSPHATE DEHYDROGENASE [NAD(P)+] GPDA1 (NAD(P)H-DEPENDENT GLYCEROL-3-PHOSPHATE DEHYDROGENASE) (NAD(P)H-DEPENDENT DIHYDROXYACETONE-PHOSPHATE REDUCTASE) [Mycobacterium tuberculosis variant bovis AF2122/97]	CAB5248287.1 (+3)	36 kDa	0	0	0	0	0	0	0	0
pyridoxal phosphate-dependent aminotransferase [Mycobacterium orygis]	QOY47420.1	44 kDa	0	0	0	0	1	0	0	2
hypothetical protein Rv1978 [Mycobacterium tuberculosis H37Rv]	NP_216494.1 (+2)	31 kDa	0	0	0	0	0	0	0	0
probable 3-hydroxyacyl-thioester dehydratase htdx [Mycobacterium tuberculosis variant bovis AF2122/97]	CAB5247953.1 (+3)	30 kDa	0	0	4	0	3	0	3	2
hypothetical protein Rv3519 [Mycobacterium tuberculosis H37Rv]	NP_218036.1 (+3)	26 kDa	0	0	0	0	1	0	0	0
short-chain type dehydrogenase/reductase [Mycobacterium tuberculosis H37Rv]	NP_215761.1 (+3)	29 kDa	0	0	0	0	1	0	0	0
lipase LipE [Mycobacterium tuberculosis H37Rv]	NP_218292.1 (+3)	45 kDa	0	0	0	0	1	0	0	0
hypothetical protein Rv2054 [Mycobacterium tuberculosis H37Rv]	NP_216570.1 (+3)	25 kDa	0	0	0	0	1	0	0	2
decaprenylphosphoryl-D-2-keto erythropentose reductase [Mycobacterium tuberculosis H37Rv]	NP_218308.1 (+3)	27 kDa	0	0	0	0	1	0	0	2
protein translocase subunit SecD [Mycobacterium tuberculosis H37Rv]	NP_217103.1 (+3)	60 kDa	0	0	0	0	0	0	0	0
ESX-5 type VII secretion system protein EccA [Mycobacterium tuberculosis H37Rv]	NP_216314.1 (+3)	68 kDa	0	0	0	0	0	0	0	0
glutamine ABC transporter ATP-binding protein [Mycobacterium tuberculosis H37Rv]	NP_217080.1 (+3)	35 kDa	0	0	0	0	1	0	0	0
oxidoreductase FadB [Mycobacterium tuberculosis H37Rv]	NP_216428.1	36 kDa	0	0	0	0	0	0	0	0
PROBABLE CONSERVED TRANSMEMBRANE PROTEIN [Mycobacterium tuberculosis variant bovis AF2122/97]	CAB5248215.1 (+3)	33 kDa	0	0	0	0	0	0	0	0
diacyglycerol O-acyltransferase [Mycobacterium tuberculosis H37Rv]	NP_217000.1 (+3)	52 kDa	0	0	0	0	0	0	0	0
glycerol-3-phosphate dehydrogenase [Mycobacterium tuberculosis H37Rv]	NP_217819.1 (+3)	63 kDa	0	0	0	0	0	0	0	0
ESX-1 secretion system protein EccB [Mycobacterium tuberculosis H37Rv]	NP_218386.1 (+3)	51 kDa	0	0	0	0	5	0	0	0
hypothetical protein Rv3719 [Mycobacterium tuberculosis H37Rv]	NP_218236.1 (+3)	53 kDa	0	0	0	0	0	0	0	0
sulfolipid-1 biosynthesis phthioceranic/hydroxyphthioceranic acid synthase [Mycobacterium tuberculosis]	gnl|extdb|pgaptmp_001634	224 kDa	0	0	0	0	0	0	0	2
p-hydroxybenzoyl--AMP ligase [Mycobacterium tuberculosis H37Rv]	NP_217464.1 (+3)	75 kDa	0	0	0	0	0	0	0	2
decaprenylphosphoryl-beta-D-ribose oxidase [Mycobacterium tuberculosis H37Rv]	NP_218307.1 (+3)	50 kDa	0	0	0	0	0	0	0	0
malate:quinone oxidoreductase [Mycobacterium tuberculosis H37Rv]	NP_217368.1 (+3)	54 kDa	0	0	0	0	0	0	0	0
methylmalonyl-CoA mutase large subunit [Mycobacterium tuberculosis H37Rv]	NP_216009.1 (+3)	81 kDa	0	0	0	0	5	0	0	0
acetylglutamate kinase [Mycobacterium tuberculosis H37Rv]	NP_216170.1 (+3)	31 kDa	0	0	0	0	0	0	0	0
POSSIBLE CONSERVED SECRETED PROTEIN [Mycobacterium tuberculosis variant bovis AF2122/97]	CAB5248095.1 (+3)	32 kDa	0	0	0	0	0	0	0	0
hypothetical protein Rv2567 [Mycobacterium tuberculosis H37Rv]	NP_217083.1 (+3)	95 kDa	0	0	0	0	0	0	0	0
1-deoxy-D-xylulose-5-phosphate synthase [Mycobacterium orygis]	QOY47757.1 (+3)	68 kDa	0	0	0	0	0	0	0	0
protein translocase subunit SecF [Mycobacterium tuberculosis H37Rv]	NP_217102.1 (+3)	47 kDa	0	0	0	0	0	0	0	0
hypothetical protein Rv3365c [Mycobacterium tuberculosis H37Rv]	NP_217882.1 (+3)	93 kDa	0	0	0	0	0	0	0	0
long-chain-fatty-acid--CoA ligase FadD12 [Mycobacterium tuberculosis H37Rv]	NP_215943.1 (+3)	58 kDa	0	0	0	0	3	0	0	0
PHENOLPTHIOCEROL SYNTHESIS TYPE-I POLYKETIDE SYNTHASE PPSD [Mycobacterium tuberculosis variant bovis AF2122/97]	SIU01580.1	193 kDa	0	0	0	0	0	0	0	0
two component sensor histidine kinase PrrB [Mycobacterium tuberculosis H37Rv]	NP_215417.1 (+3)	48 kDa	0	0	0	0	0	0	0	0
glutamine ABC transporter permease [Mycobacterium tuberculosis H37Rv]	NP_217079.1 (+3)	36 kDa	0	0	0	0	0	0	0	0
patatin-like phospholipase family protein [Mycobacterium orygis]	QOY48127.1	62 kDa	0	0	0	0	0	0	0	0
alpha-d-glucose-1-phosphate thymidylyltransferase rmla (dtdp-glucose synthase) (dtdp-glucose pyrophosphorylase) [Mycobacterium tuberculosis variant bovis AF2122/97]	CAB5248047.1 (+3)	31 kDa	0	0	0	0	0	0	3	0
phthiocerol synthesis polyketide synthase type I PpsB [Mycobacterium tuberculosis H37Rv]	NP_217448.1	163 kDa	0	0	0	0	0	0	0	0
glycerol-3-phosphate acyltransferase [Mycobacterium tuberculosis H37Rv]	NP_216998.1	88 kDa	0	0	0	0	0	0	0	0
helicase-associated domain-containing protein [Mycobacterium orygis]	QOY49631.1 (+2)	80 kDa	0	0	0	0	0	0	0	0
transglycosylase/D,D-transpeptidase PonA1 [Mycobacterium orygis]	QOY48901.1 (+2)	86 kDa	0	0	0	0	0	0	0	0
NADH dehydrogenase [Mycobacterium tuberculosis H37Rv]	NP_216370.1 (+2)	50 kDa	0	0	0	0	0	0	0	0
serine--tRNA ligase [Mycobacterium tuberculosis H37Rv]	NP_218351.1 (+3)	45 kDa	0	0	0	0	0	0	0	0
hypothetical protein Rv2061c [Mycobacterium tuberculosis H37Rv]	NP_216577.1 (+3)	15 kDa	0	0	0	0	1	0	0	0
PROBABLE CYTOCHROME P450 138 CYP138 [Mycobacterium tuberculosis variant bovis AF2122/97]	CAB5247846.1 (+3)	49 kDa	0	0	0	0	0	0	0	0
serine/threonine-protein kinase PknA [Mycobacterium tuberculosis H37Rv]	NP_214529.1 (+3)	46 kDa	0	0	0	0	0	0	0	0
transmembrane protein [Mycobacterium tuberculosis H37Rv]	NP_216735.1 (+3)	27 kDa	0	0	0	0	0	0	0	0
diaminopimelate decarboxylase [Mycobacterium tuberculosis H37Rv]	NP_215809.1 (+3)	47 kDa	0	0	0	0	10	0	0	0
Hypothetical, related to broad specificity phosphatases COG0406 [Mycobacterium tuberculosis variant bovis AF2122/97]	CAB5248245.1 (+3)	22 kDa	0	0	0	0	0	0	0	0
glucose 1-dehydrogenase [Mycobacterium orygis]	QOY48465.1 (+1)	29 kDa	0	0	0	0	1	0	0	2
UDP-galactopyranose mutase [Mycobacterium tuberculosis H37Rv]	NP_218326.1 (+3)	46 kDa	0	0	0	0	0	0	0	0
hypothetical protein Rv2955c [Mycobacterium tuberculosis H37Rv]	NP_217471.1 (+3)	36 kDa	0	0	0	0	0	0	0	0
serine/threonine-protein kinase PknE [Mycobacterium tuberculosis H37Rv]	NP_216259.1 (+2)	61 kDa	0	0	0	0	0	0	0	0
NADH dehydrogenase NdhA [Mycobacterium tuberculosis H37Rv]	NP_214906.1 (+2)	50 kDa	0	0	0	0	0	0	0	0
galactofuranosyl transferase GlfT [Mycobacterium tuberculosis H37Rv]	NP_218325.1 (+3)	72 kDa	0	0	0	0	0	0	0	0
amidase [Mycobacterium tuberculosis H37Rv]	NP_216879.1 (+3)	51 kDa	0	0	0	0	0	0	0	0
haloalkane dehalogenase [Mycobacterium tuberculosis H37Rv]	NP_216349.1 (+3)	32 kDa	0	0	0	0	0	0	0	0
ESX-1 secretion system protein EccE1 [Mycobacterium tuberculosis H37Rv]	NP_218399.1 (+3)	50 kDa	0	0	0	0	0	0	0	0
preprotein translocase subunit SecE [Mycobacterium orygis]	QOY49434.1 (+3)	17 kDa	0	0	0	0	0	0	0	0
aminotransferase class I/II-fold pyridoxal phosphate-dependent enzyme [Mycobacterium orygis]	QOY47627.1 (+3)	106 kDa	0	0	0	0	0	0	0	0
probable cyclopropane-fatty-acyl-phospholipid synthase ufaa1 (cyclopropane fatty acid synthase) (cfa synthase) [Mycobacterium tuberculosis variant bovis AF2122/97]	CAB5248161.1 (+3)	48 kDa	0	0	0	0	0	0	0	0
PROBABLE CONSERVED MCE ASSOCIATED MEMBRANE PROTEIN [Mycobacterium tuberculosis variant bovis AF2122/97]	CAB5247886.1 (+3)	22 kDa	0	0	0	0	1	0	0	0
hypothetical protein Rv3090 [Mycobacterium tuberculosis H37Rv]	NP_217606.1 (+3)	32 kDa	0	0	0	0	0	0	0	0
ABC transporter ATP-binding protein [Mycobacterium tuberculosis H37Rv]	NP_217713.1 (+3)	49 kDa	0	0	0	0	0	0	0	0
hypothetical protein Rv3732 [Mycobacterium tuberculosis H37Rv]	NP_218249.1 (+3)	38 kDa	0	0	0	0	0	0	0	0
proteasome accessory factor B [Mycobacterium tuberculosis H37Rv]	NP_216612.1 (+3)	35 kDa	0	0	0	0	4	0	0	0
oligopeptide ABC transporter substrate-binding protein OppA [Mycobacterium orygis]	QOY50004.1	63 kDa	0	0	0	0	0	0	0	0
membrane protein [Mycobacterium tuberculosis H37Rv]	NP_216719.1 (+3)	24 kDa	0	0	0	0	0	0	0	0
methyltransferase [Mycobacterium tuberculosis H37Rv]	NP_216039.1 (+3)	38 kDa	0	0	0	0	0	0	0	0
oligopeptide ABC transporter ATP-binding protein OppD [Mycobacterium tuberculosis H37Rv]	NP_215797.1 (+3)	65 kDa	0	0	0	0	0	0	0	0
PROBABLE CONSERVED TRANSMEMBRANE TRANSPORT PROTEIN MMPL11 [Mycobacterium tuberculosis variant bovis AF2122/97]	CAB5247914.1 (+3)	104 kDa	0	0	0	0	0	0	0	0
serine hydroxymethyltransferase [Mycobacterium orygis]	QOY48920.1 (+1)	45 kDa	0	0	0	0	0	0	0	0
arabinosyltransferase B [Mycobacterium tuberculosis H37Rv]	NP_218312.1 (+3)	118 kDa	0	0	0	0	0	0	0	0
coenzyme F420:L-glutamate ligase [Mycobacterium tuberculosis H37Rv]	NP_217779.1 (+2)	48 kDa	0	0	0	0	1	0	0	0
bifunctional riboflavin biosynthesis GTP cyclohydrolase II/3,4-dihydroxy-2-butanone 4-phosphate synthase [Mycobacterium tuberculosis H37Rv]	NP_215931.1 (+3)	46 kDa	0	0	0	0	1	0	0	0
PROBABLE CATION-TRANSPORTER ATPASE I CTPI [Mycobacterium tuberculosis variant bovis AF2122/97]	CAB5247813.1	168 kDa	0	0	0	0	0	0	0	0
hypothetical protein Rv1179c [Mycobacterium tuberculosis H37Rv]	NP_215695.1 (+3)	101 kDa	0	0	0	0	0	0	0	0
GMC-type oxidoreductase [Mycobacterium tuberculosis H37Rv]	NP_215795.1 (+3)	57 kDa	0	0	0	0	1	0	0	0
ATP-dependent RNA helicase RhlE [Mycobacterium tuberculosis H37Rv]	NP_217727.1 (+3)	57 kDa	0	0	0	0	0	0	0	0
POSSIBLE CYTOCHROME P450 135B1 CYP135B1 [Mycobacterium tuberculosis variant bovis AF2122/97]	CAB5248291.1 (+3)	51 kDa	0	0	0	0	0	0	0	0
mycofactocin system heme/flavin oxidoreductase MftD [Mycobacterium tuberculosis H37Rv]	NP_215208.1 (+3)	42 kDa	0	0	0	0	0	0	0	0
multifunctional RNASE H/alpha-ribazole phosphatase/acid phosphatase [Mycobacterium tuberculosis H37Rv]	NP_216744.1 (+2)	39 kDa	0	0	0	0	1	0	0	0
bifunctional (p)ppGpp synthase/hydrolase RelA [Mycobacterium tuberculosis H37Rv]	NP_217099.1 (+3)	87 kDa	0	0	0	0	0	0	0	0
transmembrane protein [Mycobacterium tuberculosis H37Rv]	NP_217052.1 (+3)	25 kDa	0	0	0	0	1	0	0	0
membrane protein [Mycobacterium tuberculosis H37Rv]	NP_218210.1 (+3)	48 kDa	0	0	0	0	0	0	0	0
exopolyphosphatase Ppx1 [Mycobacterium orygis]	QOY49303.1 (+1)	37 kDa	0	0	0	0	0	0	0	0
cytochrome ubiquinol oxidase subunit I [Mycobacterium orygis]	QOY50311.1 (+3)	54 kDa	0	0	4	0	0	0	0	0
ESX-5 type VII secretion system protein EccD [Mycobacterium tuberculosis H37Rv]	NP_216311.1 (+3)	53 kDa	0	0	0	0	0	0	0	0
hypothetical protein Rv1194c [Mycobacterium tuberculosis H37Rv]	NP_215710.1 (+3)	46 kDa	0	0	0	0	0	0	0	0
DNA primase [Mycobacterium tuberculosis H37Rv]	NP_216859.1 (+3)	70 kDa	0	0	0	0	0	0	0	0
polyphosphate kinase 2 [Mycobacterium orygis]	QOY48247.1 (+1)	33 kDa	0	0	0	0	0	0	0	0
oxidoreductase [Mycobacterium tuberculosis H37Rv]	NP_215773.1 (+2)	47 kDa	0	0	0	0	1	0	0	0
membrane protein [Mycobacterium tuberculosis H37Rv]	NP_214521.1 (+3)	31 kDa	0	0	0	0	0	0	0	0
acyl-CoA dehydrogenase FadE36 [Mycobacterium tuberculosis H37Rv]	NP_218278.1 (+3)	39 kDa	0	2	2	0	0	0	0	0
diacyglycerol O-acyltransferase [Mycobacterium tuberculosis H37Rv]	NP_217997.1 (+2)	53 kDa	0	0	0	0	0	0	0	0
alcohol dehydrogenase D [Mycobacterium tuberculosis H37Rv]	NP_217602.1 (+3)	38 kDa	0	0	0	0	8	0	0	0
cytochrome C oxidase cytochrome 1 [Mycobacterium tuberculosis H37Rv]	NP_217559.1 (+3)	64 kDa	0	0	0	0	0	0	0	0
transmembrane protein [Mycobacterium tuberculosis H37Rv]	NP_215750.1 (+3)	19 kDa	0	0	0	0	0	0	0	0
diacyglycerol O-acyltransferase [Mycobacterium tuberculosis H37Rv]	NP_217646.1 (+3)	51 kDa	0	0	0	0	0	0	0	0
N-acetylglucosaminyl-diphospho-decaprenol L-rhamnosyltransferase [Mycobacterium orygis]	QOY50819.1 (+3)	33 kDa	0	0	0	0	0	0	0	0
HAD-IB family hydrolase [Mycobacterium orygis]	QOY49314.1 (+1)	33 kDa	0	0	0	0	0	0	0	0
polyketide synthase [Mycobacterium tuberculosis H37Rv]	NP_215529.1 (+3)	58 kDa	0	0	0	0	0	0	0	0
acyltransferase PlsB [Mycobacterium tuberculosis H37Rv]	NP_216067.1 (+3)	69 kDa	0	0	0	0	0	0	0	0
excinuclease ABC subunit B [Mycobacterium orygis]	QOY50321.1 (+1)	80 kDa	0	0	0	0	0	0	0	0
POSSIBLE MEMBRANE PROTEIN [Mycobacterium tuberculosis variant bovis AF2122/97]	SIT98410.1	31 kDa	0	0	0	0	0	0	0	2
POSSIBLE OXIDOREDUCTASE [Mycobacterium tuberculosis variant bovis AF2122/97]	CAB5248269.1 (+3)	32 kDa	0	0	0	0	0	0	0	0
zinc metalloprotease [Mycobacterium tuberculosis H37Rv]	NP_217385.1 (+3)	43 kDa	0	0	0	0	0	0	0	0
carotenoid cleavage oxygenase [Mycobacterium tuberculosis H37Rv]	NP_215168.1 (+3)	55 kDa	0	0	0	0	1	0	0	0
PROBABLE BIFUNCTIONAL MENAQUINONE BIOSYNTHESIS PROTEIN MEND : 2-SUCCINYL-6-HYDROXY-2,4-CYCLOHEXADIENE-1-CARBOXYLATE SYNTHASE (SHCHC SYNTHASE) + 2-OXOGLUTARATE DECARBOXYLASE (ALPHA-KETOGLUTARATE DECARBOXYLASE) (KDC) [Mycobacterium tuberculosis variant bovis AF2122/97]	CAB5248278.1 (+3)	58 kDa	0	0	0	0	4	0	0	0
two component sensor histidine kinase DevS [Mycobacterium tuberculosis H37Rv]	NP_217648.1 (+3)	62 kDa	0	0	0	0	1	0	0	0
N-acetylmuramoyl-L-alanine amidase CwlM [Mycobacterium orygis]	QOY48843.1 (+3)	44 kDa	0	0	0	0	0	0	0	0
PROBABLE SIGNAL PEPTIDASE I LEPB (SPASE I) (LEADER PEPTIDASE I) [Mycobacterium tuberculosis variant bovis AF2122/97]	SIU01548.1	32 kDa	0	0	0	0	0	0	0	0
hypothetical protein Rv1339 [Mycobacterium tuberculosis H37Rv]	NP_215855.1 (+3)	29 kDa	0	2	0	0	0	0	0	2
ABC-F family ATP-binding cassette domain-containing protein [Mycobacterium orygis]	QOY50348.1 (+2)	65 kDa	0	0	0	0	0	0	0	0
RNase adapter RapZ [Mycobacterium orygis]	QOY50137.1	33 kDa	0	0	0	0	0	0	0	0
glutamate-ammonia-ligase adenylyltransferase [Mycobacterium tuberculosis H37Rv]	NP_216737.1 (+3)	109 kDa	0	0	0	0	0	0	0	0
cysteine:1D-myo-inosityl 2-amino-2-deoxy--D-glucopyranoside ligase [Mycobacterium tuberculosis H37Rv]	NP_216646.1 (+3)	46 kDa	0	0	2	0	3	0	0	4
Sec-independent protein translocase membrane-bound protein TatA [Mycobacterium tuberculosis H37Rv]	NP_216610.1 (+3)	9 kDa	0	0	0	0	0	0	0	0
antibiotic ABC transporter ATP-binding protein [Mycobacterium tuberculosis H37Rv]	NP_215974.1 (+3)	34 kDa	0	0	0	0	0	0	0	0
cobalamin biosynthesis protein CobN [Mycobacterium tuberculosis H37Rv]	NP_216578.1 (+2)	129 kDa	0	0	0	0	0	0	0	0
hypothetical protein Rv3850 [Mycobacterium tuberculosis H37Rv]	NP_218367.1 (+3)	24 kDa	0	0	0	0	0	0	0	0
heat-inducible transcription repressor HrcA [Mycobacterium tuberculosis H37Rv]	NP_216890.1 (+3)	36 kDa	0	0	0	0	0	0	0	0
acetyl-CoA acetyltransferase FadA [Mycobacterium tuberculosis H37Rv]	NP_218063.1 (+3)	41 kDa	0	0	2	0	4	0	0	0
anti-sigma factor rska (regulator of sigma k) [Mycobacterium tuberculosis variant bovis AF2122/97]	CAB5248158.1	24 kDa	0	0	0	0	1	0	0	0
diacylglycerol acyltransferase [Mycobacterium tuberculosis H37Rv]	NP_216801.1 (+3)	48 kDa	0	0	0	0	0	0	0	0
POSSIBLE PHOSPHATIDYLSERINE DECARBOXYLASE PSD (PS DECARBOXYLASE) [Mycobacterium tuberculosis variant bovis AF2122/97]	CAB5248151.1 (+3)	24 kDa	0	0	0	0	0	0	0	0
DUF427 domain-containing protein [Mycobacterium orygis]	QOY49801.1	29 kDa	0	0	0	0	0	0	0	0
ABC transporter ATP-binding protein [Mycobacterium tuberculosis H37Rv]	NP_217557.1 (+3)	31 kDa	0	0	0	0	0	0	0	0
oxidoreductase [Mycobacterium tuberculosis H37Rv]	NP_215442.1 (+3)	27 kDa	0	0	0	0	3	0	0	0
hypothetical protein Rv0906 [Mycobacterium tuberculosis H37Rv]	NP_215421.1 (+3)	41 kDa	0	0	0	0	0	0	0	0
UDP-N-acetylmuramate--alanine ligase [Mycobacterium tuberculosis H37Rv]	NP_216668.1 (+3)	51 kDa	0	0	0	0	0	0	0	0
RNA polymerase sigma factor SigB [Mycobacterium tuberculosis H37Rv]	NP_217226.1 (+3)	36 kDa	0	0	0	0	0	0	0	0
hypothetical protein Rv1429 [Mycobacterium tuberculosis H37Rv]	NP_215945.1 (+3)	47 kDa	0	0	0	0	7	0	0	0
hypothetical protein Rv1060 [Mycobacterium tuberculosis H37Rv]	NP_215576.1 (+3)	17 kDa	0	0	0	0	1	0	0	0
glycogen debranching protein GlgX [Mycobacterium orygis]	QOY50275.1 (+3)	81 kDa	0	0	0	0	7	0	0	0
acetyl/propionyl-CoA carboxylase subunit alpha [Mycobacterium orygis]	QOY49735.1	71 kDa	0	0	0	0	0	0	0	4
sugar ABC transporter ATP-binding protein SugC [Mycobacterium tuberculosis H37Rv]	NP_215754.1 (+3)	43 kDa	0	0	0	0	1	0	0	0
prolipoprotein diacylglyceryl transferase [Mycobacterium tuberculosis H37Rv]	NP_216130.1 (+3)	50 kDa	0	0	0	0	0	0	0	0
hypothetical protein Rv3661 [Mycobacterium tuberculosis H37Rv]	NP_218178.1 (+2)	31 kDa	0	0	0	0	0	0	0	0
ESX-5 type VII secretion system protein EccE [Mycobacterium tuberculosis H37Rv]	NP_216313.1 (+3)	44 kDa	0	0	0	0	0	0	0	0
NTE family protein [Mycobacterium tuberculosis H37Rv]	NP_217081.1 (+2)	62 kDa	0	0	0	0	0	0	0	0
membrane protein secretion factor YajC [Mycobacterium tuberculosis H37Rv]	NP_217104.1 (+3)	13 kDa	0	0	0	0	0	0	0	0
MBL fold metallo-hydrolase [Mycobacterium orygis]	QOY49220.1 (+1)	27 kDa	0	0	0	0	0	0	0	0
hypothetical protein Rv1118c [Mycobacterium tuberculosis H37Rv]	NP_215634.1 (+1)	32 kDa	0	0	0	0	0	0	0	0
alanine racemase [Mycobacterium orygis]	QOY48414.1 (+1)	41 kDa	0	0	0	0	7	0	0	0
ATP-dependent DNA helicase HelY [Mycobacterium tuberculosis H37Rv]	NP_216608.1 (+3)	100 kDa	0	0	0	0	1	0	0	0
ParA family protein [Mycobacterium orygis]	QOY50389.1 (+2)	31 kDa	0	0	0	0	0	0	0	0
dehydrogenase [Mycobacterium tuberculosis H37Rv]	NP_218243.1 (+1)	42 kDa	0	0	0	0	0	0	0	0
exodeoxyribonuclease VII large subunit [Mycobacterium tuberculosis H37Rv]	NP_215624.1 (+3)	45 kDa	0	0	0	0	0	0	0	0
acyl-CoA dehydrogenase FadE19 [Mycobacterium tuberculosis H37Rv]	NP_217016.1 (+3)	42 kDa	0	0	0	0	1	0	0	0
acyl-CoA dehydrogenase FadE26 [Mycobacterium tuberculosis H37Rv]	NP_218021.1 (+3)	44 kDa	0	0	0	0	0	0	0	0
DNA repair protein RecN [Mycobacterium tuberculosis H37Rv]	NP_216212.1 (+3)	62 kDa	0	0	0	0	1	0	0	0
mycothiol S-conjugate amidase [Mycobacterium tuberculosis H37Rv]	NP_215598.1 (+3)	33 kDa	0	0	0	0	0	0	0	0
glycerophosphoryl diester phosphodiesterase [Mycobacterium tuberculosis H37Rv]	NP_218359.1 (+3)	30 kDa	0	0	0	0	0	0	0	0
arylsulfatase AtsD [Mycobacterium tuberculosis H37Rv]	NP_215177.1 (+3)	86 kDa	0	0	0	0	0	0	3	4
uroporphyrinogen decarboxylase [Mycobacterium tuberculosis H37Rv]	NP_217194.1 (+3)	38 kDa	0	0	0	0	0	0	0	0
ATP-dependent DNA helicase UvrD [Mycobacterium tuberculosis H37Rv]	NP_217714.1 (+3)	76 kDa	0	0	0	0	0	0	0	0
hypothetical protein Rv3438 [Mycobacterium tuberculosis H37Rv]	NP_217955.1 (+3)	29 kDa	0	0	0	0	0	0	0	0
hypothetical protein Rv2559c [Mycobacterium tuberculosis H37Rv]	NP_217075.1 (+3)	47 kDa	0	0	0	0	0	0	0	0
two component system response sensor kinase PhoR [Mycobacterium tuberculosis H37Rv]	NP_215272.1 (+3)	52 kDa	0	0	0	0	0	0	0	0
thiosulfate sulfurtransferase SseB [Mycobacterium tuberculosis H37Rv]	NP_216807.1 (+2)	29 kDa	0	0	0	0	3	0	0	4
Lsr2 family protein [Mycobacterium orygis]	QOY47624.1 (+1)	35 kDa	0	0	0	0	0	0	0	0
NAD(P)/FAD-dependent oxidoreductase [Mycobacterium orygis]	QOY50468.1 (+2)	42 kDa	0	0	0	0	0	0	0	0
POSSIBLE METAL CATION TRANSPORTING P-TYPE ATPASE CTPH [Mycobacterium tuberculosis variant bovis AF2122/97]	CAB5248139.1 (+2)	160 kDa	0	0	0	0	0	0	0	0
nicotinate-nucleotide-dimethylbenzimidazol phosphoribosyltransferase [Mycobacterium tuberculosis H37Rv]	NP_216723.1 (+3)	36 kDa	0	0	0	0	1	0	0	0
membrane protein insertase YidC [Mycobacterium orygis]	QOY48849.1	41 kDa	0	0	0	0	0	0	0	0
dephospho-CoA kinase CoaE [Mycobacterium tuberculosis H37Rv]	NP_216147.1 (+3)	45 kDa	0	0	0	0	0	0	0	0
SRPBCC family protein [Mycobacterium orygis]	QOY50535.1 (+2)	18 kDa	0	0	0	0	0	0	0	0
asparagine synthetase [Mycobacterium tuberculosis H37Rv]	NP_216717.1 (+3)	72 kDa	0	0	0	0	1	0	0	0
UDP-N-acetylglucosamine 1-carboxyvinyltransferase [Mycobacterium tuberculosis H37Rv]	NP_215831.1 (+3)	44 kDa	0	0	0	0	0	0	0	0
magnesium and cobalt transport transmembrane protein CorA [Mycobacterium tuberculosis H37Rv]	NP_215755.1	42 kDa	0	0	0	0	0	0	0	0
acetyl-/propionyl-CoA carboxylase subunit alpha [Mycobacterium tuberculosis H37Rv]	NP_217017.1 (+3)	71 kDa	0	0	0	0	1	0	0	0
alpha-(1-_3)-arabinofuranosyltransferase [Mycobacterium tuberculosis H37Rv]	NP_217189.1 (+3)	49 kDa	0	0	0	0	0	0	0	0
TetR family transcriptional regulator [Mycobacterium tuberculosis H37Rv]	NP_217574.1 (+3)	24 kDa	0	0	0	0	0	0	0	0
esterase LipM [Mycobacterium tuberculosis H37Rv]	NP_216800.1 (+3)	47 kDa	0	0	0	0	0	0	0	0
hypothetical protein Rv1697 [Mycobacterium tuberculosis H37Rv]	NP_216213.1 (+3)	42 kDa	0	0	0	0	0	0	3	0
hypothetical protein Rv1232c [Mycobacterium tuberculosis H37Rv]	NP_215748.1	47 kDa	0	0	0	0	0	0	0	0
hypothetical protein Rv2030c [Mycobacterium tuberculosis H37Rv]	NP_216546.1 (+2)	75 kDa	0	0	0	0	3	0	0	0
N-succinyldiaminopimelate aminotransferase DapC [Mycobacterium tuberculosis H37Rv]	NP_215373.1 (+3)	42 kDa	0	0	0	0	5	0	0	0
chromosome partitioning protein ParA [Mycobacterium tuberculosis H37Rv]	NP_218434.2 (+3)	38 kDa	0	2	2	0	0	0	0	2
possible oxidoreductase [Mycobacterium tuberculosis variant bovis AF2122/97]	CAB5247849.1 (+3)	37 kDa	0	0	0	0	0	0	0	0
acyl-CoA dehydrogenase FadE20 [Mycobacterium tuberculosis H37Rv]	NP_217240.1 (+2)	43 kDa	0	0	0	0	1	0	0	0
glyoxalase II [Mycobacterium tuberculosis H37Rv]	NP_217097.1 (+3)	24 kDa	0	0	0	0	0	0	0	0
lipoprotein LprC [Mycobacterium tuberculosis H37Rv]	NP_215791.1 (+2)	19 kDa	0	0	0	0	0	0	0	0
nitrate reductase subunit alpha [Mycobacterium tuberculosis H37Rv]	NP_215677.1 (+1)	137 kDa	0	0	0	0	0	0	0	0
aspartate carbamoyltransferase [Mycobacterium tuberculosis H37Rv]	NP_215896.1 (+3)	34 kDa	0	0	0	0	4	0	0	0
hypothetical protein Rv2047c [Mycobacterium tuberculosis H37Rv]	NP_216563.1 (+3)	91 kDa	0	0	0	0	0	0	0	0
amidohydrolase [Mycobacterium orygis]	QOY48312.1 (+3)	41 kDa	0	0	0	0	0	0	0	2
dihydroorotate dehydrogenase [Mycobacterium tuberculosis H37Rv]	NP_216655.1 (+3)	38 kDa	0	0	0	0	0	0	0	0
membrane protein [Mycobacterium tuberculosis H37Rv]	NP_215997.1 (+3)	36 kDa	0	0	0	0	0	0	0	0
transmembrane transport protein MmpL7 [Mycobacterium tuberculosis H37Rv]	NP_217458.1 (+3)	95 kDa	0	0	0	0	0	0	0	0
alpha/beta fold hydrolase [Mycobacterium orygis]	QOY49862.1 (+1)	33 kDa	0	0	0	0	0	0	0	0
UDP-N-acetylmuramoyl-L-alanine--D-glutamate ligase [Mycobacterium orygis]	QOY47296.1 (+2)	49 kDa	0	0	0	0	0	0	0	0
two-component system sensor histidine kinase MtrB [Mycobacterium orygis]	QOY48258.1 (+2)	62 kDa	0	0	0	0	0	0	0	0
MCE-FAMILY PROTEIN MCE1D [Mycobacterium tuberculosis variant bovis AF2122/97]	CAB5247883.1 (+3)	57 kDa	0	0	0	0	0	0	0	0
transferase [Mycobacterium tuberculosis H37Rv]	NP_217255.1 (+3)	40 kDa	0	0	0	0	0	0	0	0
diacyglycerol O-acyltransferase [Mycobacterium tuberculosis H37Rv]	NP_217604.1 (+3)	51 kDa	0	0	0	0	0	0	0	0
acetolactate synthase large subunit IlvG [Mycobacterium tuberculosis H37Rv]	NP_216336.1 (+3)	58 kDa	0	0	0	0	0	0	0	2
possible glycerophosphoryl diester phosphodiesterase glpq2 (glycerophosphodiester phosphodiesterase) [Mycobacterium tuberculosis variant bovis AF2122/97]	CAB5248031.1 (+3)	28 kDa	0	0	0	0	0	0	0	0
bifunctional sulfate adenyltransferase subunit 1 CysN/adenylylsulfate kinase CysC [Mycobacterium tuberculosis H37Rv]	NP_215802.1 (+3)	68 kDa	0	0	0	0	0	0	0	0
esx conserved component eccd3. esx-3 type vii secretion system protein. probable transmembrane protein [Mycobacterium tuberculosis variant bovis AF2122/97]	CAB5248004.1 (+3)	48 kDa	0	0	0	0	0	0	0	0
lipid carrier protein or keto acyl-CoA thiolase [Mycobacterium tuberculosis H37Rv]	NP_215429.1 (+3)	44 kDa	0	0	0	0	0	0	0	0
acyltransferase [Mycobacterium tuberculosis H37Rv]	NP_218331.1 (+3)	29 kDa	0	0	0	0	0	0	0	0
glycerol-3-phosphate dehydrogenase [Mycobacterium tuberculosis H37Rv]	NP_217498.1 (+3)	34 kDa	0	0	0	0	1	0	0	0
trehalose ABC transporter substrate-binding lipoprotein LpqY [Mycobacterium tuberculosis H37Rv]	NP_215751.1 (+3)	50 kDa	0	0	0	0	3	0	0	0
large-conductance ion mechanosensitive channel [Mycobacterium tuberculosis H37Rv]	NP_215500.1 (+3)	16 kDa	0	0	0	0	0	0	0	0
hypothetical protein Rv3633 [Mycobacterium tuberculosis H37Rv]	NP_218150.1 (+3)	32 kDa	0	0	0	0	0	0	0	0
dTDP-4-dehydrorhamnose reductase [Mycobacterium tuberculosis H37Rv]	NP_217783.1	32 kDa	0	0	0	0	0	0	0	0
4-hydroxy-3-methylbut-2-enyl diphosphate reductase [Mycobacterium orygis]	QOY49848.1 (+3)	36 kDa	0	2	2	0	1	0	3	2
imidazole glycerol phosphate synthase subunit HisF [Mycobacterium orygis]	QOY50297.1 (+1)	27 kDa	0	0	0	0	0	0	0	4
thymidylate synthase ThyX [Mycobacterium tuberculosis H37Rv]	NP_217270.1 (+2)	28 kDa	0	0	0	0	3	0	0	0
DNA polymerase III subunit alpha [Mycobacterium tuberculosis H37Rv]	NP_216063.1 (+3)	129 kDa	0	0	0	0	0	0	0	0
CONSERVED HYPOTHETICAL PROTEIN [Mycobacterium tuberculosis variant bovis AF2122/97]	CAB5247895.1 (+3)	27 kDa	0	0	2	0	0	0	0	0
type II toxin-antitoxin system PemK/MazF family toxin [Mycobacterium orygis]	QOY47516.1 (+1)	23 kDa	0	0	0	0	0	0	0	0
hypothetical protein Rv0926c [Mycobacterium tuberculosis H37Rv]	NP_215441.1 (+3)	38 kDa	0	0	0	0	0	0	0	0
anthranilate phosphoribosyltransferase [Mycobacterium tuberculosis H37Rv]	NP_216708.1 (+2)	38 kDa	0	0	0	0	0	0	0	0
OXIDATIVE STRESS RESPONSE REGULATORY PROTEIN OXYS [Mycobacterium tuberculosis variant bovis AF2122/97]	CAB5247823.1 (+3)	34 kDa	0	0	0	0	0	0	0	0
beta-glucosidase BglS [Mycobacterium tuberculosis H37Rv]	NP_214700.1 (+2)	74 kDa	0	2	0	0	4	0	0	0
hypothetical protein Rv3241c [Mycobacterium tuberculosis H37Rv]	NP_217758.3 (+3)	25 kDa	0	0	0	0	1	0	0	0
hypothetical protein Rv2000 [Mycobacterium tuberculosis H37Rv]	NP_216516.1 (+3)	60 kDa	0	0	0	0	1	0	0	2
enoyl-CoA hydratase EchA11 [Mycobacterium tuberculosis H37Rv]	NP_215657.1 (+3)	28 kDa	0	0	0	0	0	0	0	0
hypothetical protein Rv2413c [Mycobacterium tuberculosis H37Rv]	NP_216929.3 (+3)	33 kDa	0	0	0	0	0	0	0	0
membrane protein [Mycobacterium tuberculosis H37Rv]	NP_217125.1 (+3)	38 kDa	0	0	0	0	0	0	0	0
hypothetical protein Rv3916c [Mycobacterium tuberculosis H37Rv]	NP_218433.1 (+3)	27 kDa	0	2	2	0	1	0	3	2
POSSIBLE TRANSMEMBRANE PROTEIN [Mycobacterium tuberculosis variant bovis AF2122/97]	CAB5248140.1 (+3)	14 kDa	0	0	0	0	0	0	0	0
universal stress protein [Mycobacterium tuberculosis H37Rv]	NP_216512.1 (+2)	34 kDa	0	0	0	0	0	0	0	0
possible quinone oxidoreductase (nadph:quinone oxidoreductase) (zeta-crystallin) [Mycobacterium tuberculosis variant bovis AF2122/97]	CAB5247859.1 (+3)	33 kDa	0	0	0	0	0	0	0	0
Amine oxidase, flavin-containing [Mycobacterium tuberculosis variant bovis AF2122/97]	CAB5248163.1 (+3)	48 kDa	0	0	0	0	0	0	0	0
NADPH dependent 2,4-dienoyl-CoA reductase FadH [Mycobacterium tuberculosis H37Rv]	NP_215691.1 (+2)	73 kDa	0	0	0	0	0	0	0	0
PUTATIVE TWO COMPONENT SENSOR HISTIDINE KINASE SENX3 [Mycobacterium tuberculosis variant bovis AF2122/97]	CAB5248207.1 (+3)	45 kDa	0	0	0	0	0	0	0	0
PROBABLE CONSERVED TRANSMEMBRANE PROTEIN [Mycobacterium tuberculosis variant bovis AF2122/97]	CAB5248248.1 (+3)	57 kDa	0	0	0	0	0	0	0	0
PROBABLE CONSERVED INTEGRAL MEMBRANE PROTEIN [Mycobacterium tuberculosis variant bovis AF2122/97]	CAB5248022.1 (+3)	26 kDa	0	0	0	0	0	0	0	0
sigma-F factor regulator [Mycobacterium orygis]	QOY50087.1 (+3)	70 kDa	0	0	0	0	0	0	0	0
POSSIBLE MCE-FAMILY LIPOPROTEIN LPRK (MCE-FAMILY LIPOPROTEIN MCE1E) [Mycobacterium tuberculosis variant bovis AF2122/97]	CAB5247884.1 (+2)	42 kDa	0	0	0	0	0	0	0	0
acyl-CoA carboxylase subunit beta [Mycobacterium orygis]	QOY50658.1 (+2)	56 kDa	0	0	0	0	0	0	0	0
amidophosphoribosyltransferase [Mycobacterium orygis]	QOY50643.1 (+1)	54 kDa	0	0	0	0	1	0	0	0
PROBABLE ALTERNATIVE RNA POLYMERASE SIGMA FACTOR SIGG (RNA POLYMERASE ECF TYPE SIGMA FACTOR) [Mycobacterium tuberculosis variant bovis AF2122/97]	CAB5247893.1 (+3)	41 kDa	0	0	0	0	0	0	0	0
monooxygenase [Mycobacterium tuberculosis H37Rv]	NP_217565.1 (+3)	59 kDa	0	0	0	0	0	0	0	0
lipase/esterase LipG [Mycobacterium tuberculosis H37Rv]	NP_215160.1 (+3)	33 kDa	0	0	0	0	0	0	0	0
protoporphyrinogen oxidase [Mycobacterium orygis]	QOY47753.1 (+3)	47 kDa	0	0	0	0	0	0	0	0
GTPase ObgE [Mycobacterium orygis]	QOY50763.1	50 kDa	0	0	0	0	0	0	0	0
PROBABLE 5-OXOPROLINASE OPLA (5-OXO-L-PROLINASE) (PYROGLUTAMASE) (5-OPASE) [Mycobacterium tuberculosis variant bovis AF2122/97]	CAB5247978.1 (+3)	130 kDa	0	0	0	0	0	0	0	0
hypothetical protein Rv3404c [Mycobacterium tuberculosis H37Rv]	NP_217921.1 (+3)	27 kDa	0	0	0	0	0	0	0	0
hypothetical protein Rv0976c [Mycobacterium tuberculosis H37Rv]	NP_215491.1 (+3)	59 kDa	0	0	0	0	0	0	0	0
porphobilinogen synthase [Mycobacterium orygis]	QOY49321.1	35 kDa	0	0	0	0	4	0	0	0
PROBABLE INTEGRAL MEMBRANE PROTEIN [Mycobacterium tuberculosis variant bovis AF2122/97]	CAB5248259.1 (+3)	50 kDa	0	0	0	0	0	0	0	0
esterase LipO [Mycobacterium tuberculosis H37Rv]	NP_215942.1 (+3)	46 kDa	0	0	0	0	0	0	0	0
two component sensor kinase [Mycobacterium tuberculosis H37Rv]	NP_217736.1 (+3)	54 kDa	0	0	0	0	0	0	0	0
Phospholipid/glycerol acyltransferase [Mycobacterium tuberculosis variant bovis AF2122/97]	CAB5248222.1 (+3)	39 kDa	0	0	0	0	0	0	0	0
lipoprotein peptidase LpqM [Mycobacterium tuberculosis H37Rv]	NP_214933.1	53 kDa	0	0	0	0	0	0	0	0
glucose-6-phosphate dehydrogenase [Mycobacterium orygis]	QOY49859.1 (+3)	52 kDa	0	0	0	0	0	0	0	0
hypothetical protein Rv1428c [Mycobacterium tuberculosis H37Rv]	NP_215944.1 (+3)	30 kDa	0	0	0	0	0	0	0	0
MerR family transcriptional regulator [Mycobacterium orygis]	QOY50485.1 (+1)	22 kDa	0	0	0	0	0	0	0	0
histidine-specific methyltransferase EtgD [Mycobacterium tuberculosis H37Rv]	NP_218218.1 (+3)	35 kDa	0	0	0	0	0	0	0	0
glutamate racemase [Mycobacterium tuberculosis H37Rv]	NP_215854.1 (+3)	29 kDa	0	0	0	0	0	0	0	0
DUF1365 domain-containing protein [Mycobacterium orygis]	QOY49256.1 (+1)	28 kDa	0	0	0	0	0	0	0	0
Ribosome hibernation promoting factor Hpf [Mycobacterium tuberculosis variant bovis AF2122/97]	CAB5247785.1 (+3)	30 kDa	0	0	0	0	0	0	0	0
hypothetical protein Rv1507c [Mycobacterium tuberculosis H37Rv]	NP_216023.1 (+2)	27 kDa	0	0	0	0	0	0	3	2
biotin synthetase [Mycobacterium tuberculosis H37Rv]	NP_216105.1 (+3)	38 kDa	0	0	0	0	0	0	0	0
hydrolase [Mycobacterium tuberculosis H37Rv]	NP_218279.1 (+2)	68 kDa	0	0	0	0	0	0	0	0
transferase [Mycobacterium tuberculosis H37Rv]	NP_218148.1 (+3)	26 kDa	0	0	0	0	0	0	0	0
PROBABLE ASPARTATE AMINOTRANSFERASE ASPC (TRANSAMINASE A) (ASPAT) [Mycobacterium tuberculosis variant bovis AF2122/97]	CAB5248050.1 (+3)	47 kDa	0	0	0	0	0	0	0	0
transcription-repair coupling factor [Mycobacterium tuberculosis H37Rv]	NP_215536.1 (+3)	133 kDa	0	0	0	0	0	0	0	0
FHA domain-containing protein FhaB [Mycobacterium tuberculosis H37Rv]	NP_214533.1 (+3)	17 kDa	0	0	0	0	0	0	0	0
DNA helicase PcrA [Mycobacterium orygis]	QOY49714.1 (+3)	85 kDa	0	0	0	0	0	0	0	0
hypothetical protein RJtmp_003711 [Mycobacterium orygis]	QOY48573.1 (+1)	43 kDa	0	0	0	0	0	0	0	0
hypothetical protein Rv1422 [Mycobacterium tuberculosis H37Rv]	NP_215938.1 (+3)	36 kDa	0	0	0	0	0	0	0	0
fatty acid--CoA ligase [Mycobacterium orygis]	QOY48947.1 (+1)	56 kDa	0	0	0	0	0	0	0	0
DAK2 domain-containing protein [Mycobacterium orygis]	QOY48020.1 (+2)	55 kDa	0	0	0	0	0	0	0	0
MCE-FAMILY PROTEIN MCE1B [Mycobacterium tuberculosis variant bovis AF2122/97]	CAB5247881.1 (+3)	38 kDa	0	0	0	0	0	0	0	0
hypothetical protein Rv2778c [Mycobacterium tuberculosis H37Rv]	NP_217294.1 (+2)	17 kDa	0	0	0	0	0	0	0	0
membrane protein [Mycobacterium tuberculosis H37Rv]	NP_217999.1 (+3)	29 kDa	0	0	0	0	0	0	0	0
DEAD/DEAH box helicase [Mycobacterium orygis]	QOY49630.1 (+1)	61 kDa	0	0	0	0	0	0	0	0
transcriptional regulator [Mycobacterium tuberculosis H37Rv]	NP_215848.1 (+3)	24 kDa	0	0	0	0	0	0	0	0
aminodeoxychorismate/anthranilate synthase component II [Mycobacterium orygis]	QOY48866.1 (+3)	25 kDa	0	0	0	0	0	0	0	0
pantothenate synthetase [Mycobacterium tuberculosis H37Rv]	NP_218119.1 (+3)	33 kDa	0	0	0	0	0	0	0	0
hypothetical protein Rv3194c [Mycobacterium tuberculosis H37Rv]	NP_217710.1 (+3)	35 kDa	0	0	0	0	0	0	0	0
integral membrane protein [Mycobacterium tuberculosis H37Rv]	NP_216295.1 (+3)	64 kDa	0	0	0	0	0	0	0	0
hypothetical protein Rv3212 [Mycobacterium tuberculosis H37Rv]	NP_217728.1 (+2)	43 kDa	0	0	0	0	1	0	0	0
acetyl-/propionyl-CoA carboxylase subunit beta [Mycobacterium tuberculosis H37Rv]	NP_217018.1 (+2)	57 kDa	0	0	0	0	3	0	0	0
hypothetical protein Rv2700 [Mycobacterium tuberculosis H37Rv]	NP_217216.1 (+3)	23 kDa	0	0	0	0	1	0	0	0
methionine synthase [Mycobacterium tuberculosis H37Rv]	NP_216640.1 (+3)	130 kDa	0	0	0	0	1	0	0	0
hypothetical protein Rv1867 [Mycobacterium tuberculosis H37Rv]	NP_216383.1 (+3)	54 kDa	0	0	0	0	0	0	0	0
hypothetical protein Rv2237 [Mycobacterium tuberculosis H37Rv]	NP_216753.1 (+3)	29 kDa	0	0	0	0	0	0	0	0
imidazole glycerol-phosphate dehydratase [Mycobacterium tuberculosis H37Rv]	NP_216117.1 (+3)	23 kDa	0	0	0	0	1	0	0	0
urease subunit alpha [Mycobacterium tuberculosis H37Rv]	NP_216366.1 (+3)	61 kDa	0	0	0	0	0	0	0	0
ABC transporter ATP-binding protein [Mycobacterium orygis]	QOY50748.1 (+1)	69 kDa	0	0	0	0	0	0	0	0
cytochrome P450 Cyp136 [Mycobacterium tuberculosis H37Rv]	NP_217575.1 (+3)	56 kDa	0	0	0	0	0	0	0	0
FO synthase [Mycobacterium tuberculosis H37Rv]	NP_215689.1 (+3)	93 kDa	0	0	0	0	0	0	0	0
arabinosyltransferase C [Mycobacterium tuberculosis H37Rv]	NP_218310.1 (+3)	117 kDa	0	0	0	0	0	0	0	0
transcriptional regulator MraZ [Mycobacterium tuberculosis H37Rv]	NP_216682.1 (+3)	16 kDa	0	0	2	0	1	0	3	0
amidase AmiB [Mycobacterium tuberculosis H37Rv]	NP_215779.1 (+3)	49 kDa	0	0	0	0	0	0	0	0
DUF1707 and DUF2154 domain-containing protein [Mycobacterium orygis]	QOY49729.1 (+1)	22 kDa	0	0	0	0	0	0	0	0
DNA polymerase [Mycobacterium tuberculosis H37Rv]	NP_218161.1 (+3)	42 kDa	0	0	0	0	0	0	0	0
hypothetical protein Rv3073c [Mycobacterium tuberculosis H37Rv]	NP_217589.1 (+3)	14 kDa	0	0	0	0	0	0	0	0
AP-4-A phosphorylase [Mycobacterium tuberculosis H37Rv]	NP_217129.1 (+3)	22 kDa	0	0	0	0	0	0	3	0
histidinol-phosphatase [Mycobacterium orygis]	QOY48158.1 (+2)	28 kDa	0	0	0	0	0	0	0	0
phosphoadenosine phosphosulfate reductase [Mycobacterium tuberculosis H37Rv]	NP_216908.1 (+3)	27 kDa	0	0	0	0	0	0	0	0
hypothetical protein Rv1288 [Mycobacterium tuberculosis H37Rv]	NP_215804.1 (+2)	50 kDa	0	0	0	0	0	0	0	0
methyltransferase [Mycobacterium tuberculosis H37Rv]	NP_217859.1 (+3)	27 kDa	0	0	0	0	0	0	0	0
PROBABLE PROTEASE TRANSMEMBRANE PROTEIN HEAT SHOCK PROTEIN HTPX [Mycobacterium tuberculosis variant bovis AF2122/97]	CAB5248286.1 (+3)	31 kDa	0	0	0	0	0	0	0	0
membrane protein [Mycobacterium tuberculosis H37Rv]	NP_217069.1 (+3)	45 kDa	0	0	0	0	0	0	0	0
NADH-quinone oxidoreductase subunit J [Mycobacterium tuberculosis H37Rv]	NP_217670.1 (+3)	28 kDa	0	0	0	0	0	0	0	0
hypothetical protein Rv1597 [Mycobacterium tuberculosis H37Rv]	NP_216113.1 (+3)	28 kDa	0	0	0	0	0	0	0	0
hypothetical protein Rv2923c [Mycobacterium tuberculosis H37Rv]	NP_217439.1 (+3)	15 kDa	0	0	0	0	4	0	0	0
enoyl-CoA hydratase [Mycobacterium orygis]	QOY50185.1 (+2)	31 kDa	0	2	2	0	0	0	3	0
fatty-acid-CoA racemase [Mycobacterium tuberculosis H37Rv]	NP_215370.1 (+3)	38 kDa	0	0	0	0	0	0	0	2
ribosome biogenesis GTPase Der [Mycobacterium orygis]	QOY50394.1	50 kDa	0	0	0	0	0	0	0	0
phosphatase [Mycobacterium tuberculosis H37Rv]	NP_216208.1 (+3)	37 kDa	0	0	0	0	1	0	0	0
membrane protein [Mycobacterium tuberculosis H37Rv]	NP_215992.1 (+3)	20 kDa	0	0	0	0	0	0	0	0
DUF4245 domain-containing protein [Mycobacterium orygis]	QOY49842.1 (+1)	22 kDa	0	0	0	0	0	0	0	0
hydrolase [Mycobacterium tuberculosis H37Rv]	NP_217231.1 (+3)	37 kDa	0	0	0	0	0	0	0	0
hypothetical protein RJtmp_001587 [Mycobacterium orygis]	QOY50216.1 (+1)	33 kDa	0	0	0	0	0	0	0	0
mycobactin non-ribosomal peptide synthetase MbtE [Mycobacterium tuberculosis]	gnl|extdb|pgaptmp_002532	189 kDa	0	0	0	0	0	0	0	0
hypothetical protein Rv0959 [Mycobacterium tuberculosis H37Rv]	NP_215474.1 (+3)	75 kDa	0	0	0	0	0	0	0	0
PROBABLE TRANSCRIPTIONAL REGULATORY PROTEIN [Mycobacterium tuberculosis variant bovis AF2122/97]	CAB5248191.1 (+3)	15 kDa	0	0	0	0	0	0	3	0
hypothetical protein Rv3819 [Mycobacterium tuberculosis H37Rv]	NP_218336.1 (+3)	13 kDa	0	0	0	0	0	0	0	0
glucose-1-phosphate adenylyltransferase [Mycobacterium tuberculosis H37Rv]	NP_215729.1 (+3)	44 kDa	0	0	0	0	1	0	0	0
hypothetical protein Rv1676 [Mycobacterium tuberculosis H37Rv]	NP_216192.1 (+3)	26 kDa	0	0	0	0	0	0	0	0
lipoprotein [Mycobacterium tuberculosis H37Rv]	NP_217101.1 (+3)	59 kDa	0	0	0	0	0	0	0	0
DNA ligase [Mycobacterium tuberculosis H37Rv]	NP_217578.1 (+3)	54 kDa	0	0	0	0	0	0	0	0
alkyldihydroxyacetonephosphate synthase [Mycobacterium tuberculosis H37Rv]	NP_217623.1 (+3)	57 kDa	0	0	0	0	0	0	0	0
transcriptional regulator [Mycobacterium tuberculosis H37Rv]	NP_217505.1 (+3)	24 kDa	0	0	0	0	0	0	0	0
DNA translocase FtsK [Mycobacterium tuberculosis H37Rv]	NP_217264.1 (+3)	94 kDa	0	0	0	0	0	0	0	0
hypothetical protein Rv1084 [Mycobacterium tuberculosis H37Rv]	NP_215600.1 (+3)	71 kDa	0	0	0	0	0	0	0	0
hypothetical protein Rv3691 [Mycobacterium tuberculosis H37Rv]	NP_218208.1 (+3)	35 kDa	0	0	0	0	0	0	0	0
dTDP-4-amino-4,6-dideoxygalactose transaminase (EC [Mycobacterium tuberculosis variant bovis AF2122/97]	SIU00145.1	?	0	0	0	0	0	0	0	0
chalcone synthase [Mycobacterium tuberculosis H37Rv]	NP_216176.1 (+3)	37 kDa	0	0	0	0	1	0	0	0
hypothetical protein Rv3226c [Mycobacterium tuberculosis H37Rv]	NP_217743.1 (+3)	28 kDa	0	0	0	0	0	0	0	0
hypothetical protein Rv0756c [Mycobacterium tuberculosis H37Rv]	NP_215270.1 (+3)	25 kDa	0	0	0	0	0	0	0	0
carbamoyl-phosphate synthase small subunit [Mycobacterium tuberculosis H37Rv]	NP_215899.1 (+3)	40 kDa	0	0	0	0	0	0	0	0
hypothetical protein Rv0877 [Mycobacterium tuberculosis H37Rv]	NP_215392.1 (+3)	27 kDa	0	0	0	0	1	0	0	0
aminoglycoside phosphotransferase [Mycobacterium tuberculosis H37Rv]	NP_217684.1 (+2)	43 kDa	0	0	0	0	0	0	3	2
zinc protease [Mycobacterium tuberculosis H37Rv]	NP_217298.1 (+3)	47 kDa	0	0	0	0	0	0	0	0
cell division protein FtsX [Mycobacterium tuberculosis H37Rv]	NP_217617.1 (+3)	33 kDa	0	0	0	0	0	0	0	0
50S ribosomal protein L30 [Mycobacterium tuberculosis H37Rv]	NP_215236.1 (+3)	7 kDa	0	0	0	0	0	0	0	0
pantothenate kinase [Mycobacterium tuberculosis H37Rv]	NP_215608.1 (+3)	36 kDa	0	0	0	0	1	0	0	0
acyl-CoA dehydrogenase FadE34 [Mycobacterium tuberculosis H37Rv]	NP_218090.1 (+3)	75 kDa	0	0	0	0	0	0	0	0
thymidylate synthase [Mycobacterium orygis]	QOY47831.1 (+1)	30 kDa	0	0	0	0	0	0	0	0
monoxygenase [Mycobacterium tuberculosis H37Rv]	NP_215909.1 (+3)	55 kDa	0	0	0	0	0	0	0	0
arylsulfatase AtsA [Mycobacterium tuberculosis H37Rv]	NP_215225.1 (+2)	86 kDa	0	0	0	0	0	0	0	0
3-hydroxyisobutyrate dehydrogenase [Mycobacterium tuberculosis H37Rv]	NP_215265.1 (+3)	30 kDa	0	0	0	0	0	0	0	2
hypothetical protein Rv2681 [Mycobacterium tuberculosis H37Rv]	NP_217197.1 (+3)	47 kDa	0	0	0	0	0	0	0	0
biotin sulfoxide reductase BisC [Mycobacterium tuberculosis H37Rv]	NP_215958.1 (+3)	83 kDa	0	0	0	0	0	0	0	0
glutamine synthetase GlnA [Mycobacterium tuberculosis H37Rv]	NP_216394.1 (+3)	47 kDa	0	0	0	0	1	0	0	0
hypothetical protein Rv1265 [Mycobacterium tuberculosis H37Rv]	NP_215781.1 (+3)	25 kDa	0	0	0	0	1	0	0	0
membrane protein [Mycobacterium tuberculosis H37Rv]	NP_218207.1 (+3)	24 kDa	0	0	0	0	0	0	0	0
hypothetical protein Rv1513 [Mycobacterium tuberculosis H37Rv]	NP_216029.1 (+2)	27 kDa	0	0	0	0	0	0	0	0
thiamine-monophosphate kinase [Mycobacterium tuberculosis H37Rv]	NP_217493.1 (+3)	34 kDa	0	2	2	0	0	0	0	0
thiamine biosynthesis oxidoreductase ThiO [Mycobacterium tuberculosis H37Rv]	NP_214929.1 (+2)	37 kDa	0	0	0	0	0	0	0	0
membrane protein [Mycobacterium tuberculosis H37Rv]	NP_215416.1 (+3)	19 kDa	0	0	0	0	0	0	0	0
Mce associated protein [Mycobacterium tuberculosis H37Rv]	NP_218010.1 (+3)	26 kDa	0	0	0	0	0	0	0	0
galactofuranosyl transferase GlfT1 [Mycobacterium orygis]	QOY48721.1 (+3)	34 kDa	0	0	0	0	0	0	0	0
MOSC domain-containing protein [Mycobacterium orygis]	QOY50715.1 (+1)	25 kDa	0	0	0	0	0	0	0	0
probable glutamyl-trna reductase hema (glutr) [Mycobacterium tuberculosis variant bovis AF2122/97]	CAB5248229.1 (+3)	49 kDa	0	0	0	0	0	0	0	0
HTH-type transcriptional regulator [Mycobacterium tuberculosis H37Rv]	NP_216344.1 (+3)	26 kDa	0	0	0	0	0	0	0	0
macrolide ABC transporter ATP-binding protein [Mycobacterium tuberculosis H37Rv]	NP_215989.1 (+3)	58 kDa	0	0	0	0	0	0	0	0
recombination protein RecR [Mycobacterium tuberculosis H37Rv]	NP_218232.1 (+3)	22 kDa	0	0	0	0	0	0	0	0
hypothetical protein Rv2795c [Mycobacterium tuberculosis H37Rv]	NP_217311.1 (+3)	38 kDa	0	0	0	0	0	0	0	0
hypothetical protein Rv2569c [Mycobacterium tuberculosis H37Rv]	NP_217085.1 (+3)	34 kDa	0	0	0	0	0	0	0	0
Sulfotransferase [Mycobacterium tuberculosis variant bovis AF2122/97]	CAB5248009.1 (+3)	30 kDa	0	0	0	0	0	0	0	0
long-chain-fatty-acid--ACP ligase MbtM [Mycobacterium tuberculosis H37Rv]	NP_215861.1 (+3)	54 kDa	0	0	0	0	0	0	0	0
NAD(+) diphosphatase [Mycobacterium orygis]	QOY48215.1 (+2)	34 kDa	0	0	0	0	0	0	0	0
bifunctional lysine--tRNA ligase/phosphatidylglycerol lysyltransferase [Mycobacterium tuberculosis H37Rv]	NP_216156.1 (+1)	128 kDa	0	0	0	0	0	0	0	0
trehalose 6-phosphate phosphatase [Mycobacterium tuberculosis H37Rv]	NP_217889.1 (+3)	42 kDa	0	0	0	0	3	0	0	0
O-antigen/lipopolysaccharide ABC transporter ATP-binding protein RfbE [Mycobacterium tuberculosis H37Rv]	NP_218298.1 (+3)	30 kDa	0	0	0	0	0	0	0	0
PROBABLE CONSERVED LIPOPROTEIN LPPY [Mycobacterium tuberculosis variant bovis AF2122/97]	SIU01648.1 (+1)	34 kDa	0	0	0	0	1	0	0	0
two component histidine-protein kinase/phosphatase MprB [Mycobacterium tuberculosis H37Rv]	NP_215497.1 (+3)	54 kDa	0	0	0	0	0	0	0	0
endonuclease III [Mycobacterium tuberculosis H37Rv]	NP_218191.2 (+3)	27 kDa	0	0	0	0	0	0	0	0
8-oxo-dGTP diphosphatase [Mycobacterium tuberculosis H37Rv]	NP_217501.1 (+3)	35 kDa	0	0	0	0	3	0	0	0
50S ribosomal protein L31 [Mycobacterium tuberculosis H37Rv]	NP_215814.1 (+3)	9 kDa	0	0	0	0	0	0	0	0
hypothetical protein Rv0791c [Mycobacterium tuberculosis H37Rv]	NP_215306.1 (+3)	38 kDa	0	0	0	0	0	0	0	0
lipid carrier protein [Mycobacterium tuberculosis H37Rv]	NP_218040.1 (+3)	41 kDa	0	0	0	0	0	0	0	0
phenyloxazoline synthase [Mycobacterium tuberculosis H37Rv]	NP_216899.1 (+2)	152 kDa	0	0	0	0	0	0	0	0
antibiotic ABC transporter ATP-binding protein [Mycobacterium tuberculosis H37Rv]	NP_217204.1 (+3)	33 kDa	0	0	0	0	0	0	0	0
CysO-cysteine peptidase [Mycobacterium tuberculosis H37Rv]	NP_215850.1 (+3)	17 kDa	0	2	0	0	1	0	0	0
type III pantothenate kinase [Mycobacterium tuberculosis H37Rv]	NP_218117.1 (+3)	29 kDa	0	0	0	0	3	0	0	0
hypothetical protein Rv1593c [Mycobacterium tuberculosis H37Rv]	NP_216109.1 (+2)	26 kDa	0	0	0	0	0	0	0	0
hypothetical protein Rv2409c [Mycobacterium tuberculosis H37Rv]	NP_216925.1 (+3)	31 kDa	0	0	0	0	0	0	0	0
fructose-bisphosphate aldolase family protein [Mycobacterium tuberculosis variant bovis AF2122/97]	CAB5248077.1 (+3)	42 kDa	0	0	0	0	0	0	0	0
transmembrane protein [Mycobacterium tuberculosis H37Rv]	NP_215227.1 (+3)	34 kDa	0	0	0	0	0	0	0	0
hypothetical protein Rv0740 [Mycobacterium tuberculosis H37Rv]	NP_215254.1 (+3)	19 kDa	0	2	2	0	4	0	0	2
transcriptional regulator [Mycobacterium tuberculosis H37Rv]	NP_216235.1 (+3)	28 kDa	0	0	0	0	1	0	0	0
nicotinate-nucleotide adenylyltransferase [Mycobacterium tuberculosis H37Rv]	NP_216937.1 (+2)	23 kDa	0	0	0	0	0	0	0	0
1-deoxy-D-xylulose 5-phosphate reductoisomerase [Mycobacterium tuberculosis H37Rv]	NP_217386.2 (+3)	43 kDa	0	0	0	0	0	0	0	0
hypothetical protein Rv2522c [Mycobacterium tuberculosis H37Rv]	NP_217038.1 (+3)	49 kDa	0	0	0	0	0	0	0	0
copper-translocating P-type ATPase [Mycobacterium orygis]	QOY50657.1 (+2)	80 kDa	0	0	0	0	0	0	0	0
homoserine O-acetyltransferase [Mycobacterium tuberculosis H37Rv]	NP_217858.1 (+3)	40 kDa	0	0	0	0	0	0	0	0
POSSIBLE HYDROLASE [Mycobacterium tuberculosis variant bovis AF2122/97]	SIU01729.1 (+2)	67 kDa	0	0	0	0	0	0	0	0
dipeptidase PepE [Mycobacterium tuberculosis H37Rv]	NP_216605.1 (+3)	39 kDa	0	0	0	0	3	0	0	2
hypothetical protein Rv3243c [Mycobacterium tuberculosis H37Rv]	NP_217760.1 (+3)	31 kDa	0	0	0	0	0	0	0	0
hypothetical protein Rv2475c [Mycobacterium tuberculosis H37Rv]	NP_216991.1 (+3)	16 kDa	0	0	0	0	0	0	0	0
hypothetical protein Rv1823 [Mycobacterium tuberculosis H37Rv]	NP_216339.1 (+3)	32 kDa	0	0	0	0	0	0	0	0
transmembrane protein [Mycobacterium tuberculosis H37Rv]	NP_216553.1 (+3)	35 kDa	0	0	0	0	0	0	0	0
PROBABLE MONOOXYGENASE [Mycobacterium tuberculosis variant bovis AF2122/97]	CAB5248288.1 (+3)	55 kDa	0	0	0	0	0	0	0	0
oxidoreductase [Mycobacterium tuberculosis H37Rv]	NP_218047.1 (+3)	28 kDa	0	0	0	0	0	0	0	0
galactose-1-phosphate uridylyltransferase [Mycobacterium orygis]	QOY50631.1 (+1)	40 kDa	0	0	0	0	0	0	0	0
esterase [Mycobacterium tuberculosis H37Rv]	NP_216363.1 (+3)	15 kDa	0	7	2	0	1	0	0	0
aspartate aminotransferase family protein [Mycobacterium orygis]	QOY48337.1 (+1)	50 kDa	0	0	0	0	1	0	0	0
NADH-quinone oxidoreductase subunit N [Mycobacterium tuberculosis H37Rv]	NP_217674.1 (+3)	55 kDa	0	0	0	0	0	0	0	0
ISONIAZID INDUCTIBLE GENE PROTEIN INIC [Mycobacterium tuberculosis variant bovis AF2122/97]	CAB5248056.1 (+3)	53 kDa	0	0	0	0	0	0	0	0
cobyric acid synthase CobQ [Mycobacterium tuberculosis H37Rv]	NP_218230.1 (+3)	24 kDa	0	0	0	0	1	0	0	0
bifunctional diaminohydroxyphosphoribosylaminopyrimidine deaminase/5-amino-6-(5-phosphoribosylamino)uracil reductase [Mycobacterium tuberculosis H37Rv]	NP_217187.1 (+3)	28 kDa	0	0	0	0	0	0	0	0
alpha-(1-2)-phosphatidylinositol mannosyltransferase [Mycobacterium tuberculosis H37Rv]	NP_217126.1 (+3)	40 kDa	0	0	0	0	0	0	0	0
dihydropteroate synthase [Mycobacterium tuberculosis H37Rv]	NP_215723.1 (+3)	33 kDa	0	0	0	0	0	0	0	0
cytochrome P450 [Mycobacterium orygis]	QOY50705.1	48 kDa	0	0	0	0	0	0	0	0
uracil phosphoribosyltransferase [Mycobacterium tuberculosis H37Rv]	NP_217826.1 (+2)	22 kDa	0	0	0	0	0	0	0	0
bifunctional cephalosporin acylase/gamma-glutamyltranspeptidase [Mycobacterium tuberculosis H37Rv]	NP_215287.1 (+3)	55 kDa	0	0	0	0	4	0	0	0
membrane protein [Mycobacterium tuberculosis H37Rv]	NP_218212.1 (+3)	33 kDa	0	0	0	0	0	0	0	0
hypothetical protein Rv2423 [Mycobacterium tuberculosis H37Rv]	NP_216939.1 (+3)	39 kDa	0	0	0	0	0	0	0	0
acyl-CoA dehydrogenase FadE21 [Mycobacterium tuberculosis H37Rv]	NP_217305.1 (+3)	45 kDa	0	0	0	0	0	0	0	0
hypothetical protein Rv2018 [Mycobacterium tuberculosis H37Rv]	NP_216534.1 (+2)	26 kDa	0	0	0	0	0	0	0	0
glutamate 5-kinase protein [Mycobacterium tuberculosis H37Rv]	NP_216955.1 (+3)	39 kDa	0	0	0	0	0	0	0	0
phosphatidylinositol mannoside acyltransferase [Mycobacterium orygis]	QOY47703.1 (+2)	35 kDa	0	0	0	0	0	0	0	0
POSSIBLE OXIDOREDUCTASE [Mycobacterium tuberculosis variant bovis AF2122/97]	CAB5247803.1 (+3)	33 kDa	0	0	0	0	0	0	0	0
lipoprotein LpqU [Mycobacterium tuberculosis H37Rv]	NP_215538.1 (+3)	26 kDa	0	0	0	0	0	0	0	0
hypothetical protein Rv1443c [Mycobacterium tuberculosis H37Rv]	NP_215959.1 (+3)	18 kDa	0	0	0	0	0	0	0	0
bifunctional riboflavin kinase /FMN adenylyltransferase [Mycobacterium tuberculosis H37Rv]	NP_217302.1 (+3)	36 kDa	0	0	0	0	1	0	0	0
PROBABLE UBIQUINONE/MENAQUINONE BIOSYNTHESIS METHYLTRANSFERASE MENH (2-heptaprenyl-1,4-naphthoquinone methyltransferase) [Mycobacterium tuberculosis variant bovis AF2122/97]	CAB5248281.1 (+3)	25 kDa	0	0	0	0	0	0	0	0
PROBABLE PYRROLIDONE-CARBOXYLATE PEPTIDASE PCP (5-OXOPROLYL-PEPTIDASE) (PYROGLUTAMYL-PEPTIDASE I) (PGP-I) (PYRASE) [Mycobacterium tuberculosis variant bovis AF2122/97]	CAB5248033.1 (+3)	23 kDa	0	0	0	0	1	0	0	0
short chain alcohol dehydrogenase/reductase [Mycobacterium tuberculosis H37Rv]	NP_217573.1 (+3)	31 kDa	0	0	0	0	0	0	0	0
hypothetical protein Rv2242 [Mycobacterium tuberculosis H37Rv]	NP_216758.1 (+3)	45 kDa	0	0	0	0	0	0	0	0
hypothetical protein Rv0839 [Mycobacterium tuberculosis H37Rv]	NP_215354.1 (+3)	30 kDa	0	0	0	0	0	0	0	0
hypothetical protein Rv1059 [Mycobacterium tuberculosis H37Rv]	NP_215575.1 (+3)	37 kDa	0	0	0	0	0	0	0	0
patatin-like protein [Mycobacterium orygis]	QOY48459.1 (+1)	116 kDa	0	0	0	0	0	0	0	0
hypothetical protein Rv0991c [Mycobacterium tuberculosis H37Rv]	NP_215506.1 (+3)	11 kDa	0	0	0	0	1	0	0	0
PROBABLE CONSERVED LIPOPROTEIN LPRQ [Mycobacterium tuberculosis variant bovis AF2122/97]	CAB5248200.1 (+3)	48 kDa	0	0	0	0	0	0	0	0
L,D-transpeptidase LdtB [Mycobacterium tuberculosis H37Rv]	NP_217034.1 (+3)	43 kDa	0	0	0	0	0	0	0	0
NTE family protein [Mycobacterium tuberculosis H37Rv]	NP_215579.1 (+3)	38 kDa	0	0	0	0	0	0	0	0
SWIM zinc finger family protein [Mycobacterium orygis]	QOY47248.1 (+2)	30 kDa	0	0	0	0	0	0	0	0
wax ester/triacylglycerol synthase family O-acyltransferase [Mycobacterium orygis]	QOY50141.1 (+2)	50 kDa	0	0	0	0	0	0	0	0
magnesium chelatase [Mycobacterium tuberculosis H37Rv]	NP_217366.1 (+1)	67 kDa	0	0	0	0	0	0	0	0
adenylate/guanylate cyclase domain-containing protein [Mycobacterium orygis]	QOY50043.1 (+2)	62 kDa	0	0	0	0	0	0	0	0
DUF2652 domain-containing protein [Mycobacterium orygis]	QOY47655.1 (+2)	28 kDa	0	0	0	0	0	0	0	0
5-formyltetrahydrofolate cyclo-ligase [Mycobacterium orygis]	QOY49750.1 (+2)	21 kDa	0	0	0	0	0	0	0	0
1-acylglycerol-3-phosphate O-acyltransferase [Mycobacterium tuberculosis H37Rv]	NP_216698.1 (+3)	27 kDa	0	0	0	0	0	0	0	0
aldehyde dehydrogenase AldA [Mycobacterium tuberculosis H37Rv]	NP_215282.1 (+3)	51 kDa	0	0	0	0	0	0	0	0
hypothetical protein Rv2954c [Mycobacterium tuberculosis H37Rv]	NP_217470.1 (+3)	27 kDa	0	0	0	0	0	0	0	0
hypothetical protein Rv1894c [Mycobacterium tuberculosis H37Rv]	NP_216410.1 (+3)	40 kDa	0	0	0	0	0	0	0	0
transmembrane protein [Mycobacterium tuberculosis H37Rv]	NP_215588.1 (+3)	29 kDa	0	0	0	0	0	0	0	0
Mce family protein Mce4C [Mycobacterium tuberculosis H37Rv]	NP_218014.1 (+3)	38 kDa	0	0	0	0	0	0	0	0
esterase/lipase LipP [Mycobacterium tuberculosis H37Rv]	NP_216979.1 (+3)	43 kDa	0	0	0	0	0	0	0	0
alpha/beta hydrolase [Mycobacterium orygis]	QOY50805.1	32 kDa	0	0	0	0	0	0	0	0
hypothetical protein Rv1251c [Mycobacterium tuberculosis H37Rv]	NP_215767.1 (+3)	123 kDa	0	0	0	0	0	0	0	0
transposase fusion protein [Mycobacterium tuberculosis H37Rv]	NP_217844.1 (+3)	63 kDa	0	0	0	0	0	0	0	0
3-dehydroquinate dehydratase [Mycobacterium tuberculosis H37Rv]	NP_217053.1 (+3)	16 kDa	0	0	0	0	0	0	3	0
hypothetical protein Rv3860 [Mycobacterium tuberculosis H37Rv]	NP_218377.1 (+2)	42 kDa	0	0	0	0	0	0	0	0
PROBABLE TRANSCRIPTIONAL REGULATORY PROTEIN (POSSIBLY TETR-FAMILY) [Mycobacterium tuberculosis variant bovis AF2122/97]	CAB5248189.1 (+3)	26 kDa	0	0	0	0	0	0	3	0
hypothetical protein Rv3489 [Mycobacterium tuberculosis H37Rv]	NP_218006.1 (+3)	6 kDa	0	0	0	0	1	0	0	0
endonuclease NucS [Mycobacterium tuberculosis H37Rv]	NP_215837.1	25 kDa	0	0	0	0	0	0	0	0
D-xylulose kinase XylB [Mycobacterium tuberculosis H37Rv]	NP_215243.1 (+3)	47 kDa	0	0	0	0	0	0	0	0
terminal beta-(1-_2)-arabinofuranosyltransferase [Mycobacterium orygis]	QOY48743.1 (+1)	73 kDa	0	0	0	0	0	0	0	0
lipoprotein LpqG [Mycobacterium tuberculosis H37Rv]	NP_218140.1 (+2)	25 kDa	0	0	0	0	0	0	0	0
acyl-CoA dehydrogenase FadE16 [Mycobacterium tuberculosis H37Rv]	NP_216195.1 (+3)	38 kDa	0	0	0	0	0	0	0	0
hypothetical protein Rv2695 [Mycobacterium tuberculosis H37Rv]	NP_217211.1 (+3)	24 kDa	0	0	0	0	0	0	0	0
PROBABLE UDP-N-ACETYLENOLPYRUVOYLGLUCOSAMINE REDUCTASE MURB (UDP-N-ACETYLMURAMATE DEHYDROGENASE) [Mycobacterium tuberculosis variant bovis AF2122/97]	CAB5248199.1 (+3)	39 kDa	0	0	0	0	1	0	0	0
methylmalonyl-CoA epimerase [Mycobacterium orygis]	QOY50046.1 (+3)	17 kDa	0	0	0	0	1	0	0	0
adenylate cyclase [Mycobacterium tuberculosis H37Rv]	NP_216163.1 (+3)	34 kDa	0	0	0	0	0	0	0	0
1,4-alpha-glucan branching protein [Mycobacterium tuberculosis H37Rv]	NP_217547.1 (+3)	58 kDa	0	0	0	0	0	0	0	0
POSSIBLE CONSERVED TRANSMEMBRANE PROTEIN [Mycobacterium tuberculosis variant bovis AF2122/97]	CAB5247912.1 (+3)	24 kDa	0	0	0	0	0	0	0	0
acyl-CoA dehydrogenase FadE35 [Mycobacterium tuberculosis H37Rv]	NP_218314.1 (+3)	65 kDa	0	0	0	0	1	0	0	0
acyltransferase PapA [Mycobacterium tuberculosis H37Rv]	NP_218341.1 (+2)	56 kDa	0	0	0	0	0	0	0	0
cytidylate kinase [Mycobacterium tuberculosis H37Rv]	NP_216228.1 (+3)	24 kDa	0	2	0	0	3	0	0	0
PROBABLE CONSERVED MCE ASSOCIATED PROTEIN [Mycobacterium tuberculosis variant bovis AF2122/97]	CAB5247888.1 (+3)	20 kDa	0	0	0	0	1	0	0	0
TatD family hydrolase [Mycobacterium orygis]	QOY49765.1 (+1)	31 kDa	0	0	0	0	0	0	0	0
hypothetical protein Rv0799c [Mycobacterium tuberculosis H37Rv]	NP_215314.1 (+3)	36 kDa	0	0	0	0	1	0	0	0
PQQ-like beta-propeller repeat protein [Mycobacterium orygis]	QOY50800.1 (+1)	45 kDa	0	0	0	0	0	0	3	0
tRNA pseudouridine synthase A [Mycobacterium tuberculosis H37Rv]	NP_217972.3 (+3)	28 kDa	0	0	0	0	4	0	0	0
rhamnosyl O-methyltransferase [Mycobacterium tuberculosis H37Rv]	NP_217475.1 (+3)	28 kDa	0	0	0	0	0	0	0	0
hypothetical protein Rv2574 [Mycobacterium tuberculosis H37Rv]	NP_217090.1 (+3)	19 kDa	0	0	0	0	0	0	0	0
alpha/beta hydrolase [Mycobacterium orygis]	QOY47720.1 (+2)	46 kDa	0	0	0	0	0	0	0	0
malate oxidoreductase [Mycobacterium tuberculosis H37Rv]	NP_216848.2	59 kDa	0	0	0	0	0	0	0	0
hypothetical protein Rv1841c [Mycobacterium tuberculosis H37Rv]	NP_216357.1 (+3)	37 kDa	0	0	0	0	0	0	0	0
hypothetical protein Rv2004c [Mycobacterium tuberculosis H37Rv]	NP_216520.1 (+3)	54 kDa	0	0	0	0	0	0	0	0
nucleotide-sugar epimerase EpiA [Mycobacterium tuberculosis H37Rv]	NP_216028.1 (+2)	35 kDa	0	0	0	0	0	0	0	0
hypothetical protein Rv1026 [Mycobacterium tuberculosis H37Rv]	NP_215542.1 (+3)	34 kDa	0	0	0	0	0	0	0	0
methylated-DNA--protein-cysteine methyltransferase [Mycobacterium tuberculosis H37Rv]	NP_215832.1 (+3)	18 kDa	0	2	0	0	0	0	0	0
preprotein translocase SecY [Mycobacterium tuberculosis H37Rv]	NP_215246.1 (+3)	48 kDa	0	0	0	0	0	0	0	0
hypothetical protein Rv1192 [Mycobacterium tuberculosis H37Rv]	NP_215708.1 (+3)	30 kDa	0	0	0	0	0	0	0	0
L-serine dehydratase [Mycobacterium tuberculosis H37Rv]	NP_214583.1 (+3)	49 kDa	0	0	0	0	1	0	0	0
dioxygenase [Mycobacterium tuberculosis H37Rv]	NP_215428.1 (+3)	57 kDa	0	0	0	0	1	0	0	0
Holliday junction ATP-dependent DNA helicase RuvB [Mycobacterium tuberculosis H37Rv]	NP_217108.1 (+3)	37 kDa	0	0	0	0	0	0	0	0
aromatic acid exporter family protein [Mycobacterium orygis]	QOY47663.1	37 kDa	0	0	0	0	0	0	0	0
PROBABLE GLUTAMINE-TRANSPORT TRANSMEMBRANE PROTEIN ABC TRANSPORTER [Mycobacterium tuberculosis variant bovis AF2122/97]	CAB5247775.1 (+3)	36 kDa	0	0	0	0	0	0	0	0
transmembrane protein [Mycobacterium tuberculosis H37Rv]	NP_217248.1 (+3)	22 kDa	0	0	0	0	0	0	0	0
hypothetical protein Rv1501 [Mycobacterium tuberculosis H37Rv]	NP_216017.1 (+2)	31 kDa	0	0	0	0	0	0	0	0
hypothetical protein Rv2008c [Mycobacterium tuberculosis H37Rv]	NP_216524.1 (+3)	48 kDa	0	0	0	0	0	0	0	0
hypothetical protein Rv3647c [Mycobacterium tuberculosis H37Rv]	NP_218164.1 (+3)	20 kDa	0	0	0	0	0	0	0	0
universal stress protein [Mycobacterium tuberculosis H37Rv]	NP_217650.1 (+3)	28 kDa	0	0	0	0	0	0	0	0
integral membrane protein [Mycobacterium tuberculosis H37Rv]	NP_216629.1 (+3)	42 kDa	0	0	0	0	0	0	0	0
hypothetical protein Rv3210c [Mycobacterium tuberculosis H37Rv]	NP_217726.1 (+3)	25 kDa	0	0	2	0	0	0	0	0
universal stress protein [Mycobacterium tuberculosis H37Rv]	NP_217140.1 (+3)	29 kDa	0	0	0	0	1	0	0	0
enoyl-CoA hydratase EchA7 [Mycobacterium tuberculosis H37Rv]	NP_215486.1 (+3)	28 kDa	0	0	0	0	1	0	0	0
hypothetical protein Rv3054c [Mycobacterium tuberculosis H37Rv]	NP_217570.1 (+3)	19 kDa	0	0	0	0	0	0	0	0
class I SAM-dependent methyltransferase [Mycobacterium orygis]	QOY48330.1 (+3)	22 kDa	0	0	0	0	0	0	0	0
ATP/GTP-binding protein [Mycobacterium tuberculosis H37Rv]	NP_217879.1 (+3)	21 kDa	0	0	0	0	0	0	0	0
FIG00821990: molecular chaperone [Mycobacterium tuberculosis variant bovis AF2122/97]	CAB5248026.1 (+3)	64 kDa	0	0	0	0	0	0	0	0
hypothetical protein Rv1209 [Mycobacterium tuberculosis H37Rv]	NP_215725.1 (+3)	13 kDa	0	0	0	0	0	0	0	0
ATP-dependent RNA helicase DeaD [Mycobacterium tuberculosis H37Rv]	NP_215769.1 (+3)	61 kDa	0	0	0	0	0	0	0	0
electron transfer protein FdxB [Mycobacterium tuberculosis H37Rv]	NP_218071.1 (+3)	77 kDa	0	0	0	0	0	0	0	0
oxidoreductase [Mycobacterium tuberculosis H37Rv]	NP_215566.1 (+3)	32 kDa	0	0	0	0	0	0	0	0
HTH-type transcriptional repressor EthR [Mycobacterium tuberculosis H37Rv]	NP_218372.1 (+3)	24 kDa	0	0	0	0	3	0	3	0
transcriptional regulator [Mycobacterium tuberculosis H37Rv]	NP_215195.1 (+3)	21 kDa	0	0	0	0	1	0	3	0
lipoprotein LprB [Mycobacterium tuberculosis H37Rv]	NP_215790.1 (+3)	20 kDa	0	0	0	0	0	0	0	0
tRNA pseudouridine synthase B [Mycobacterium tuberculosis H37Rv]	NP_217309.1 (+3)	32 kDa	0	0	0	0	3	0	0	0
isocitrate lyase/phosphoenolpyruvate mutase family protein [Mycobacterium orygis]	QOY47156.1 (+2)	27 kDa	0	0	0	0	0	0	0	0
membrane-anchored mycosin [Mycobacterium tuberculosis H37Rv]	NP_218400.1 (+3)	45 kDa	0	0	0	0	0	0	0	0
hypothetical protein Rv1204c [Mycobacterium tuberculosis H37Rv]	NP_215720.1 (+2)	59 kDa	0	0	0	0	0	0	0	0
alpha-(1-6)-phosphatidylinositol monomannoside mannosyltransferase [Mycobacterium tuberculosis H37Rv]	NP_216704.2 (+3)	41 kDa	0	0	0	0	0	0	0	0
universal stress protein [Mycobacterium tuberculosis H37Rv]	NP_216542.1 (+3)	31 kDa	0	0	0	0	0	0	0	0
polyprenyl-diphosphate synthase GrcC [Mycobacterium orygis]	QOY50661.1 (+2)	35 kDa	0	0	0	0	0	0	0	0
DNA replication/repair protein RecF [Mycobacterium orygis]	QOY48854.1 (+2)	42 kDa	0	0	0	0	0	0	0	0
transcriptional repressor Mce3R [Mycobacterium tuberculosis H37Rv]	NP_216479.1 (+3)	44 kDa	0	0	0	0	0	0	0	0
sulfate ABC transporter substrate-binding lipoprotein SubI [Mycobacterium tuberculosis H37Rv]	NP_216916.1 (+3)	37 kDa	0	0	0	0	3	0	0	0
hypothetical protein Rv0059 [Mycobacterium tuberculosis H37Rv]	NP_214573.1 (+3)	26 kDa	0	0	0	0	0	0	0	0
cytochrome P450 Cyp137 [Mycobacterium tuberculosis H37Rv]	NP_218202.1 (+3)	52 kDa	0	0	0	0	0	0	0	0
diacylglycerol kinase [Mycobacterium tuberculosis H37Rv]	NP_216768.1 (+3)	33 kDa	0	0	0	0	0	0	0	0
NAD-dependent oxidoreductase [Mycobacterium tuberculosis H37Rv]	NP_215201.1 (+3)	29 kDa	0	0	0	0	0	0	0	0
bifunctional S-adenosyl-L-methionine-precorrin-2 methyl transferase/precorrin-3 methylase [Mycobacterium tuberculosis H37Rv]	NP_216582.1 (+3)	54 kDa	0	0	0	0	0	0	0	0
hypothetical protein Rv1762c [Mycobacterium tuberculosis H37Rv]	NP_216278.1 (+2)	29 kDa	0	0	0	0	0	0	0	0
hypothetical protein Rv1748 [Mycobacterium tuberculosis H37Rv]	NP_216264.1 (+3)	27 kDa	0	0	0	0	0	0	0	4
hypothetical protein Rv3483c [Mycobacterium tuberculosis H37Rv]	NP_218000.1 (+3)	23 kDa	0	0	0	0	1	0	0	0
membrane-anchored mycosin [Mycobacterium tuberculosis H37Rv]	NP_218403.1 (+3)	56 kDa	0	0	0	0	1	0	0	0
transcriptional regulator [Mycobacterium tuberculosis H37Rv]	NP_214537.1 (+3)	27 kDa	0	0	0	0	0	0	0	0
hypothetical protein Rv1455 [Mycobacterium tuberculosis H37Rv]	NP_215971.1 (+3)	31 kDa	0	0	0	0	0	0	0	0
50S ribosomal protein L28 [Mycobacterium orygis]	QOY48021.1 (+2)	7 kDa	0	0	0	0	0	0	0	0
PROBABLE TRANSCRIPTIONAL REGULATORY PROTEIN (PROBABLY LUXR/UHPA-FAMILY) [Mycobacterium tuberculosis variant bovis AF2122/97]	CAB5248098.1 (+3)	117 kDa	0	0	0	0	0	0	0	0
purine nucleoside phosphorylase [Mycobacterium tuberculosis H37Rv]	NP_217824.1 (+3)	28 kDa	0	0	0	0	1	0	0	2
multifunctional uroporphyrin-III C-methyltransferase/precorrin-2 oxidase/ferrochelatase [Mycobacterium tuberculosis H37Rv]	NP_215025.2 (+3)	42 kDa	0	0	0	0	0	0	0	0
cysteine desulfurase [Mycobacterium tuberculosis H37Rv]	NP_217541.1 (+3)	41 kDa	0	0	0	0	1	0	0	0
phosphomannomutase PmmB [Mycobacterium tuberculosis H37Rv]	NP_217825.1 (+3)	56 kDa	0	0	0	0	1	0	0	0
ATP synthase subunit A [Mycobacterium tuberculosis H37Rv]	NP_215820.1 (+3)	27 kDa	0	0	0	0	0	0	0	0
alcohol dehydrogenase A [Mycobacterium tuberculosis H37Rv]	NP_216378.1 (+3)	37 kDa	0	0	0	0	0	0	0	0
arabinofuranosyltransferase [Mycobacterium tuberculosis H37Rv]	NP_218309.1 (+3)	70 kDa	0	0	0	0	0	0	0	0
glycine betaine/carnitine/choline/L-proline ABC transporter ATP-binding protein ProV [Mycobacterium tuberculosis H37Rv]	NP_218275.1 (+3)	40 kDa	0	0	0	0	0	0	0	0
aminoglycosides/tetracycline-transport integral membrane protein [Mycobacterium tuberculosis H37Rv]	NP_215926.1 (+3)	55 kDa	0	0	0	0	0	0	0	0
PROBABLE 5'-METHYLTHIOADENOSINE PHOSPHORYLASE PNP (MTA PHOSPHORYLASE) [Mycobacterium tuberculosis variant bovis AF2122/97]	CAB5248257.1 (+3)	28 kDa	0	0	0	0	0	0	0	0
hypothetical protein Rv0029 [Mycobacterium tuberculosis H37Rv]	NP_214543.1 (+3)	40 kDa	0	0	0	0	0	0	0	0
glycosyltransferase [Mycobacterium tuberculosis H37Rv]	NP_216016.1 (+3)	38 kDa	0	0	0	0	0	0	0	0
2-phospho-L-lactate transferase [Mycobacterium tuberculosis H37Rv]	NP_217778.1 (+3)	35 kDa	0	0	0	0	0	0	0	0
alcohol dehydrogenase catalytic domain-containing protein [Mycobacterium orygis]	QOY48998.1 (+1)	38 kDa	0	0	0	0	0	0	0	0
membrane protein [Mycobacterium tuberculosis H37Rv]	NP_218405.1 (+1)	38 kDa	0	0	0	0	0	0	0	0
nitrate reductase subunit beta [Mycobacterium tuberculosis H37Rv]	NP_215678.1 (+3)	62 kDa	0	0	0	0	0	0	0	0
hypothetical protein Rv2566 [Mycobacterium tuberculosis H37Rv]	NP_217082.1	125 kDa	0	0	0	0	0	0	0	0
transmembrane protein [Mycobacterium tuberculosis H37Rv]	NP_218240.1 (+3)	27 kDa	0	0	0	0	0	0	0	0
probable 3-hydroxyl-thioester dehydratase [Mycobacterium tuberculosis variant bovis AF2122/97]	CAB5247837.1 (+3)	16 kDa	0	0	2	0	0	0	0	2
3-ketosteroid-9-alpha-hydroxylase oxygenase subunit [Mycobacterium tuberculosis H37Rv]	NP_218043.1 (+3)	44 kDa	0	0	0	0	3	0	0	0
PGL/p-HBAD biosynthesis rhamnosyltransferase [Mycobacterium tuberculosis H37Rv]	NP_217478.1 (+3)	49 kDa	0	0	0	0	0	0	0	0
succinyl-CoA transferase [Mycobacterium tuberculosis H37Rv]	NP_215317.1 (+3)	25 kDa	0	0	0	0	0	0	0	0
hypothetical protein Rv3626c [Mycobacterium tuberculosis H37Rv]	NP_218143.1 (+3)	38 kDa	0	0	0	0	0	0	0	0
antibiotic-resistance protein [Mycobacterium tuberculosis H37Rv]	NP_216819.1 (+3)	35 kDa	0	0	0	0	0	0	0	0
POSSIBLE MUTATOR PROTEIN MUTT3 (7,8-DIHYDRO-8-OXOGUANINE-TRIPHOSPHATASE) (8-OXO-DGTPASE) (DGTP PYROPHOSPHOHYDROLASE) [Mycobacterium tuberculosis variant bovis AF2122/97]	CAB5248127.1 (+1)	23 kDa	0	0	0	0	0	0	0	0
hypothetical protein Rv0690c [Mycobacterium tuberculosis H37Rv]	NP_215204.1 (+3)	38 kDa	0	0	0	0	0	0	0	0
tyrosine recombinase XerD [Mycobacterium tuberculosis H37Rv]	NP_216217.1 (+3)	34 kDa	0	0	0	0	0	0	0	0
penicillin-binding lipoprotein [Mycobacterium tuberculosis H37Rv]	NP_217380.1 (+3)	63 kDa	0	0	0	0	0	0	0	0
membrane protein [Mycobacterium tuberculosis H37Rv]	NP_217113.1 (+3)	22 kDa	0	0	0	0	0	0	0	0
thiolase domain-containing protein [Mycobacterium orygis]	QOY48495.1 (+2)	38 kDa	0	0	0	0	0	0	0	0
alpha/beta hydrolase [Mycobacterium orygis]	QOY48344.1 (+2)	30 kDa	0	0	0	0	0	0	0	0
HIT family protein [Mycobacterium orygis]	QOY49985.1 (+2)	16 kDa	0	0	0	0	0	0	0	0
hypothetical protein Rv1977 [Mycobacterium tuberculosis H37Rv]	NP_216493.1 (+1)	38 kDa	0	0	0	0	0	0	0	0
aldehyde dehydrogenase [Mycobacterium tuberculosis H37Rv]	NP_214737.1 (+1)	51 kDa	0	0	0	0	4	0	0	0
transmembrane protein [Mycobacterium tuberculosis H37Rv]	NP_215469.1 (+3)	30 kDa	0	0	0	0	0	0	0	0
ribonuclease VapC1 [Mycobacterium tuberculosis H37Rv]	NP_214579.1 (+3)	14 kDa	0	0	2	0	0	0	0	2
conserved protein [Mycobacterium tuberculosis variant bovis AF2122/97]	CAB5247913.1 (+3)	19 kDa	0	0	0	0	0	0	0	0
hypothetical protein RJtmp_001310 [Mycobacterium orygis]	QOY49968.1 (+1)	30 kDa	0	0	0	0	1	0	0	0
POSSIBLE CONSERVED TRANSMEMBRANE PROTEIN [Mycobacterium tuberculosis variant bovis AF2122/97]	CAB5248233.1 (+3)	19 kDa	0	0	0	0	0	0	0	0
glycosyltransferase family 2 protein [Mycobacterium orygis]	QOY49346.1 (+1)	23 kDa	0	0	0	0	0	0	0	0
PROBABLE PHOSPHOMETHYLPYRIMIDINE KINASE THID (HMP-PHOSPHATE KINASE) (HMP-P KINASE) [Mycobacterium tuberculosis variant bovis AF2122/97]	CAB5248136.1 (+3)	28 kDa	0	0	0	0	0	0	0	0
mutator protein MutT [Mycobacterium tuberculosis H37Rv]	NP_218425.1 (+3)	27 kDa	0	0	0	0	0	0	0	0
GNAT family N-acetyltransferase [Mycobacterium orygis]	QOY47841.1 (+1)	21 kDa	0	0	0	0	0	0	0	0
DoxX family protein [Mycobacterium orygis]	QOY50203.1	12 kDa	0	0	0	0	0	0	0	0
transmembrane protein [Mycobacterium tuberculosis H37Rv]	NP_218211.1 (+3)	35 kDa	0	0	0	0	0	0	0	0
HTH-type transcriptional regulator [Mycobacterium tuberculosis H37Rv]	NP_214557.1 (+2)	27 kDa	0	0	0	0	0	0	0	0
O-sialoglycoprotein endopeptidase [Mycobacterium tuberculosis H37Rv]	NP_217936.1 (+3)	35 kDa	0	0	0	0	0	0	0	0
enoyl-CoA hydratase EchA10 [Mycobacterium tuberculosis H37Rv]	NP_215658.1 (+3)	28 kDa	0	0	0	0	0	0	0	0
PROBABLE FATTY-ACID-COA LIGASE FADD8 (FATTY-ACID-COA SYNTHETASE) (FATTY-ACID-COA SYNTHASE) [Mycobacterium tuberculosis variant bovis AF2122/97]	CAB5248274.1 (+3)	61 kDa	0	0	0	0	0	0	0	0
hypothetical protein Rv2854 [Mycobacterium tuberculosis H37Rv]	NP_217370.1 (+3)	38 kDa	0	0	0	0	0	0	0	0
hypothetical protein Rv3813c [Mycobacterium tuberculosis H37Rv]	NP_218330.1 (+3)	29 kDa	0	0	0	0	0	0	0	0
ESX-1 secretion system protein EccD1 [Mycobacterium tuberculosis H37Rv]	NP_218394.1 (+3)	54 kDa	0	0	0	0	0	0	0	0
hypothetical protein Rv3773c [Mycobacterium tuberculosis H37Rv]	NP_218290.1 (+2)	21 kDa	0	0	0	0	1	0	0	2
hypothetical protein Rv3005c [Mycobacterium tuberculosis H37Rv]	NP_217521.1 (+3)	29 kDa	0	0	0	0	0	0	0	0
oxidoreductase [Mycobacterium tuberculosis H37Rv]	NP_216779.1 (+3)	34 kDa	0	0	0	0	0	0	0	0
nitrogen fixation related protein [Mycobacterium tuberculosis H37Rv]	NP_215981.1 (+3)	18 kDa	0	0	0	0	0	0	0	2
short-chain type dehydrogenase/reductase [Mycobacterium tuberculosis H37Rv]	NP_216398.1 (+3)	30 kDa	0	0	0	0	0	0	0	0
POSSIBLE TRANSCRIPTIONAL REGULATORY PROTEIN (POSSIBLY TETR/ACRR-FAMILY) [Mycobacterium tuberculosis variant bovis AF2122/97]	CAB5248041.1 (+3)	21 kDa	0	0	0	0	0	0	0	2
DNA ligase C [Mycobacterium tuberculosis H37Rv]	NP_218248.1 (+3)	40 kDa	0	0	0	0	0	0	0	0
transmembrane protein [Mycobacterium tuberculosis H37Rv]	NP_216882.1 (+3)	47 kDa	0	0	0	0	0	0	0	0
two-component system sensor histidine kinase TcrY [Mycobacterium orygis]	QOY50858.1	50 kDa	0	0	0	0	0	0	0	0
Mce family lipoprotein LprN [Mycobacterium tuberculosis H37Rv]	NP_218012.1 (+3)	41 kDa	0	0	0	0	0	0	0	0
Mce associated protein [Mycobacterium tuberculosis H37Rv]	NP_218009.1 (+3)	18 kDa	0	0	0	0	0	0	0	0
PROBABLE CONSERVED TRANSMEMBRANE PROTEIN [Mycobacterium tuberculosis variant bovis AF2122/97]	CAB5247917.1 (+3)	38 kDa	0	0	0	0	0	0	0	0
FHA domain-containing protein [Mycobacterium orygis]	QOY48334.1 (+1)	42 kDa	0	0	0	0	0	0	0	0
transmembrane protein [Mycobacterium tuberculosis H37Rv]	NP_214565.1 (+3)	61 kDa	0	0	0	0	0	0	0	0
Pirin [Mycobacterium tuberculosis variant bovis AF2122/97]	CAB5247892.1 (+3)	26 kDa	0	0	0	0	0	0	0	0
dipeptide ABC transporter substrate-binding lipoprotein DppA [Mycobacterium tuberculosis H37Rv]	NP_218183.1 (+3)	58 kDa	0	0	0	0	4	0	0	0
esx-3 secretion-associated protein espg3 [Mycobacterium tuberculosis variant bovis AF2122/97]	CAB5248003.1 (+3)	32 kDa	0	0	0	0	0	0	3	0
3-ketosteroid-9-alpha-hydroxylase reductase subunit [Mycobacterium tuberculosis H37Rv]	NP_218088.1 (+3)	38 kDa	0	0	0	0	0	0	0	0
POSSIBLE CONSERVED TRANSMEMBRANE PROTEIN [Mycobacterium tuberculosis variant bovis AF2122/97]	CAB5248190.1 (+3)	51 kDa	0	0	0	0	0	0	0	0
hypothetical protein Rv0941c [Mycobacterium tuberculosis H37Rv]	NP_215456.1 (+3)	27 kDa	0	0	0	0	0	0	0	0
hypothetical protein Rv1111c [Mycobacterium tuberculosis H37Rv]	NP_215627.2 (+3)	37 kDa	0	0	0	0	0	0	0	0
aspartate aminotransferase AspB [Mycobacterium tuberculosis H37Rv]	NP_218082.1 (+3)	41 kDa	0	0	0	0	0	0	0	0
ATP-dependent DNA helicase RecG [Mycobacterium tuberculosis H37Rv]	NP_217489.1 (+3)	80 kDa	0	0	0	0	0	0	0	0
hypothetical protein RJtmp_000484 [Mycobacterium orygis]	QOY49269.1 (+1)	20 kDa	0	0	0	0	0	0	0	2
lipoprotein LppL [Mycobacterium tuberculosis H37Rv]	NP_216654.1 (+3)	37 kDa	0	0	0	0	1	0	0	0
PROBABLE LIPOPROTEIN LPQJ [Mycobacterium tuberculosis variant bovis AF2122/97]	CAB5248057.1 (+3)	19 kDa	0	0	0	0	0	0	0	0
transmembrane protein [Mycobacterium tuberculosis H37Rv]	NP_217620.1 (+3)	33 kDa	0	0	0	0	0	0	0	0
hypothetical protein Rv2418c [Mycobacterium tuberculosis H37Rv]	NP_216934.1 (+3)	27 kDa	0	0	0	0	0	0	0	0
hypothetical protein Rv1069c [Mycobacterium tuberculosis H37Rv]	NP_215585.1 (+3)	64 kDa	0	0	0	0	0	0	0	0
membrane protein [Mycobacterium tuberculosis H37Rv]	NP_215765.1 (+3)	28 kDa	0	0	0	0	0	0	0	0
hypothetical protein Rv1691 [Mycobacterium tuberculosis H37Rv]	NP_216207.1 (+3)	27 kDa	0	0	0	0	0	0	0	0
hypothetical protein Rv1312 [Mycobacterium tuberculosis H37Rv]	NP_215828.1 (+3)	17 kDa	0	0	0	0	0	0	0	0
MCE-FAMILY PROTEIN MCE4F [Mycobacterium tuberculosis variant bovis AF2122/97]	SIU02151.1	60 kDa	0	0	0	0	0	0	0	0
50S ribosomal protein L36 [Mycobacterium tuberculosis H37Rv]	NP_217978.1 (+3)	4 kDa	0	0	0	0	0	0	0	0
NADH-quinone oxidoreductase subunit L [Mycobacterium tuberculosis H37Rv]	NP_217672.1 (+3)	66 kDa	0	0	0	0	0	0	0	0
oxidoreductase [Mycobacterium tuberculosis H37Rv]	NP_215284.1 (+2)	30 kDa	0	0	0	0	0	0	0	0
DEAD/DEAH box helicase [Mycobacterium tuberculosis]	gnl|extdb|pgaptmp_002157	178 kDa	0	0	0	0	0	0	0	0
HYPOTHETICAL PROTEIN BQ2027_MB0491C [Mycobacterium tuberculosis variant bovis AF2122/97]	CAB5248198.1 (+3)	19 kDa	0	0	0	0	0	0	3	0
hypothetical protein RJtmp_000118 [Mycobacterium orygis]	QOY48954.1 (+1)	8 kDa	0	0	0	0	3	0	0	0
MBL fold metallo-hydrolase [Mycobacterium orygis]	QOY48734.1 (+3)	39 kDa	0	0	0	0	1	0	0	0
hypothetical protein Rv2568c [Mycobacterium tuberculosis H37Rv]	NP_217084.1 (+3)	38 kDa	0	0	0	0	1	0	0	0
hypothetical protein Rv3254 [Mycobacterium tuberculosis H37Rv]	NP_217771.1 (+3)	52 kDa	0	0	0	0	0	0	0	0
two component sensor histidine kinase TrcS [Mycobacterium tuberculosis H37Rv]	NP_215548.1 (+3)	55 kDa	0	0	0	0	0	0	0	0
hypothetical protein Rv3218 [Mycobacterium tuberculosis H37Rv]	NP_217734.1 (+3)	34 kDa	0	0	0	0	0	0	0	0
phosphate starvation-inducible protein PsiH [Mycobacterium tuberculosis H37Rv]	NP_215611.1 (+3)	47 kDa	0	0	0	0	0	0	0	0
transcriptional regulator [Mycobacterium tuberculosis H37Rv]	NP_216050.1 (+3)	25 kDa	0	0	0	0	1	0	0	0
ligase [Mycobacterium tuberculosis H37Rv]	NP_218229.1 (+2)	43 kDa	0	0	0	0	0	0	0	0
methyltransferase [Mycobacterium tuberculosis H37Rv]	NP_215923.1 (+3)	48 kDa	0	0	0	0	0	0	0	0
hypothetical protein Rv0968 [Mycobacterium tuberculosis H37Rv]	NP_215483.1 (+3)	10 kDa	0	0	0	0	0	0	0	0
PROBABLE OXIDOREDUCTASE [Mycobacterium tuberculosis variant bovis AF2122/97]	CAB5247781.1 (+2)	30 kDa	0	0	0	0	0	0	0	0
HYPOTHETICAL PROTEIN BQ2027_MB2110 [Mycobacterium tuberculosis variant bovis AF2122/97]	SIU00717.1	36 kDa	0	0	0	0	0	0	0	0
ATP-dependent helicase [Mycobacterium tuberculosis H37Rv]	NP_217813.1	161 kDa	0	0	0	0	0	0	0	0
L-aspartate oxidase [Mycobacterium tuberculosis H37Rv]	NP_216111.1 (+3)	54 kDa	0	0	0	0	0	0	0	0
phosphate ABC transporter ATP-binding protein PstB [Mycobacterium tuberculosis H37Rv]	NP_215448.1 (+1)	30 kDa	0	0	0	0	0	0	0	0
enoyl-CoA hydratase EchA19 [Mycobacterium tuberculosis H37Rv]	NP_218033.1 (+3)	28 kDa	0	0	0	0	0	0	0	0
aminodeoxychorismate lyase [Mycobacterium orygis]	QOY50644.1 (+3)	31 kDa	0	0	0	0	0	0	0	0
orotidine 5'-phosphate decarboxylase [Mycobacterium tuberculosis H37Rv]	NP_215901.1 (+3)	27 kDa	0	0	0	0	0	0	0	0
GCN5-like N-acetyltransferase [Mycobacterium tuberculosis H37Rv]	NP_217367.1 (+3)	18 kDa	0	0	0	0	0	0	0	0
ArsA family ATPase [Mycobacterium orygis]	QOY50735.1 (+1)	45 kDa	0	0	0	0	0	0	0	0
PROBABLE TRANSCRIPTIONAL REGULATORY PROTEIN (PROBABLY TETR/ACRR-FAMILY) [Mycobacterium tuberculosis variant bovis AF2122/97]	CAB5247943.1 (+3)	25 kDa	0	0	0	0	0	0	0	0
fatty acyl-AMP ligase [Mycobacterium orygis]	QOY48887.1 (+3)	61 kDa	0	0	0	0	0	0	0	0
integral membrane protein [Mycobacterium tuberculosis H37Rv]	NP_217608.1 (+3)	32 kDa	0	0	0	0	0	0	0	0
PROBABLE FATTY-ACID-COA LIGASE FADD4 (FATTY-ACID-COA SYNTHETASE) (FATTY-ACID-COA SYNTHASE) [Mycobacterium tuberculosis variant bovis AF2122/97]	CAB5247926.1 (+3)	59 kDa	0	0	0	0	0	0	0	0
NADH-quinone oxidoreductase subunit A [Mycobacterium tuberculosis H37Rv]	NP_217661.1 (+3)	14 kDa	0	0	0	0	0	0	0	0
mycofactocin biosynthesis glycosyltransferase MftF [Mycobacterium tuberculosis H37Rv]	NP_215210.1 (+3)	51 kDa	0	0	0	0	0	0	0	0
DUF4328 domain-containing protein [Mycobacterium orygis]	QOY48778.1 (+1)	37 kDa	0	0	0	0	0	0	0	0
Mce family protein Mce4B [Mycobacterium tuberculosis H37Rv]	NP_218015.1 (+3)	37 kDa	0	0	0	0	0	0	0	0
[truncated: 679 more rows]
